# Supplementary material for: Pan-Genome Analysis of Human Gastric PathogenH. pylori: Comparative Genomics and Pathogenomics Approaches to Identify Regions Associated with Pathogenicity and Prediction of Potential Core Therapeutic Targets
Source: Hindawi journal article supplement (doi:10.1155/2015/139580), 2015-01-01
Supplement: f1 [file 139580.f1.zip]

Homology between proteomes

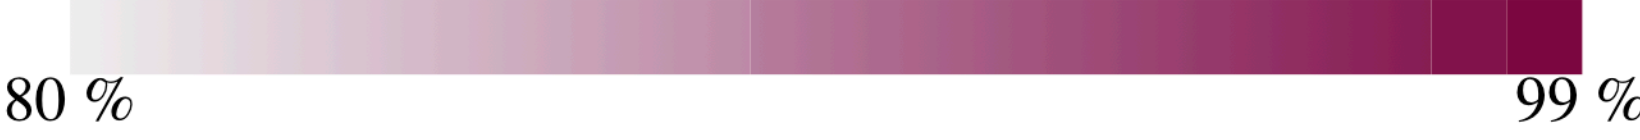

Homology within proteomes

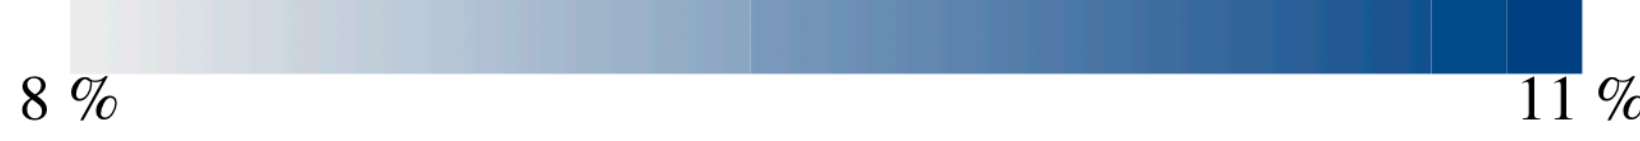

| Helicobacter pylori_2017 | Helicobacter pylori_2018 | Helicobacter pylori_26695 | Helicobacter pylori_35A | Helicobacter pylori_51 | Helicobacter pylori_52 | Helicobacter pylori_83 | Helicobacter pylori_908 | Helicobacter pylori_B38 | Helicobacter pylori_B8p | Helicobacter pylori_Cuz20 | Helicobacter pylori_ELS37p | Helicobacter pylori_F16 | Helicobacter pylori_F30p | Helicobacter pylori_F57 | Helicobacter pylori_G27p | Helicobacter pylori_HPAC1p | Helicobacter pylori_HUP-B14p | Helicobacter pylori_India7 | Helicobacter pylori_J99 | Helicobacter pylori_Lithuania75p | Helicobacter pylori_P12p | Helicobacter pylori_PeCan8 | Helicobacter pylori_PeCan4p | Helicobacter pylori_Puno135 | Helicobacter pylori_PeSim180 | Helicobacter pylori_SNT49p | Helicobacter pylori_Sat464p | Helicobacter pylori_Shi112 | Helicobacter pylori_Shi169 | Helicobacter pylori_Shi417 | Helicobacter pylori_Shi90 | Helicobacter pylori_XZ274p | Helicobacter pylori_XZ240p |                     |                     |                     |
|--------------------------|--------------------------|---------------------------|-------------------------|------------------------|------------------------|------------------------|-------------------------|-------------------------|-------------------------|---------------------------|----------------------------|-------------------------|--------------------------|-------------------------|--------------------------|----------------------------|------------------------------|----------------------------|-------------------------|----------------------------------|--------------------------|----------------------------|-----------------------------|-----------------------------|------------------------------|----------------------------|-----------------------------|----------------------------|----------------------------|----------------------------|---------------------------|----------------------------|----------------------------|---------------------|---------------------|---------------------|
| 89 %<br>1347 / 1510      | 90 %<br>1357 / 1510      | 93 %<br>1400 / 1510       | 91 %<br>1377 / 1510     | 91 %<br>1367 / 1510    | 91 %<br>1377 / 1510    | 92 %<br>1384 / 1510    | 89 %<br>1344 / 1510     | 90 %<br>1357 / 1510     | 91 %<br>1379 / 1510     | 92 %<br>1382 / 1510       | 91 %<br>1375 / 1510        | 92 %<br>1387 / 1510     | 91 %<br>1379 / 1510      | 93 %<br>1369 / 1510     | 91 %<br>1371 / 1510      | 84 %<br>1401 / 1510        | 92 %<br>1372 / 1510          | 91 %<br>1375 / 1510        | 90 %<br>1352 / 1510     | 91 %<br>1372 / 1510              | 90 %<br>1367 / 1510      | 91 %<br>1381 / 1510        | 92 %<br>1376 / 1510         | 92 %<br>1383 / 1510         | 92 %<br>1389 / 1510          | 90 %<br>1373 / 1510        | 91 %<br>1369 / 1510         | 91 %<br>1373 / 1510        | 91 %<br>1371 / 1510        | 91 %<br>1419 / 1701        | 91 %<br>1413 / 1701       | 92 %<br>1425 / 1701        | 91 %<br>1421 / 1701        | 93 %<br>1398 / 1510 | 9 %<br>142 / 1510   |                     |
| 81 %<br>1382 / 1701      | 81 %<br>1386 / 1701      | 84 %<br>1424 / 1701       | 83 %<br>1415 / 1701     | 83 %<br>1387 / 1518    | 82 %<br>1400 / 1701    | 83 %<br>1382 / 1701    | 81 %<br>1408 / 1701     | 81 %<br>1405 / 1545     | 83 %<br>1377 / 1510     | 83 %<br>1387 / 1518       | 83 %<br>1403 / 1701        | 83 %<br>1387 / 1518     | 82 %<br>1400 / 1701      | 85 %<br>1371 / 1510     | 84 %<br>1401 / 1701      | 83 %<br>1417 / 1701        | 82 %<br>1406 / 1701          | 81 %<br>1374 / 1518        | 81 %<br>1372 / 1510     | 82 %<br>1389 / 1518              | 83 %<br>1403 / 1701      | 83 %<br>1376 / 1518        | 83 %<br>1383 / 1518         | 84 %<br>1407 / 1518         | 83 %<br>1401 / 1701          | 83 %<br>1409 / 1701        | 81 %<br>1371 / 1701         | 83 %<br>1419 / 1701        | 83 %<br>1413 / 1701        | 84 %<br>1425 / 1701        | 84 %<br>1421 / 1701       | 10 %<br>162 / 1701         | 82 %<br>1399 / 1701        |                     |                     |                     |
| 90 %<br>1365 / 1518      | 91 %<br>1374 / 1518      | 92 %<br>1395 / 1518       | 91 %<br>1385 / 1518     | 91 %<br>1388 / 1518    | 91 %<br>1387 / 1518    | 91 %<br>1387 / 1518    | 90 %<br>1368 / 1518     | 89 %<br>1348 / 1518     | 92 %<br>1401 / 1518     | 94 %<br>1426 / 1518       | 91 %<br>1382 / 1518        | 92 %<br>1390 / 1518     | 91 %<br>1386 / 1518      | 93 %<br>1379 / 1518     | 91 %<br>1411 / 1518      | 93 %<br>1410 / 1518        | 93 %<br>1405 / 1518          | 90 %<br>1372 / 1518        | 90 %<br>1368 / 1518     | 92 %<br>1389 / 1518              | 92 %<br>1389 / 1518      | 91 %<br>1376 / 1518        | 92 %<br>1384 / 1518         | 92 %<br>1397 / 1518         | 91 %<br>1404 / 1518          | 92 %<br>1397 / 1518        | 92 %<br>1404 / 1518         | 93 %<br>1414 / 1518        | 95 %<br>1435 / 1518        | 94 %<br>1420 / 1518        | 9 %<br>142 / 1518         | 95 %<br>1444 / 1518        | 91 %<br>1384 / 1518        |                     |                     |                     |
| 89 %<br>1368 / 1545      | 89 %<br>1375 / 1545      | 91 %<br>1412 / 1545       | 90 %<br>1386 / 1545     | 91 %<br>1402 / 1545    | 90 %<br>1387 / 1545    | 91 %<br>1378 / 1516    | 88 %<br>1367 / 1545     | 88 %<br>1355 / 1545     | 92 %<br>1395 / 1516     | 93 %<br>1433 / 1545       | 92 %<br>1417 / 1545        | 90 %<br>1392 / 1545     | 90 %<br>1386 / 1545      | 91 %<br>1400 / 1545     | 91 %<br>1411 / 1545      | 91 %<br>1410 / 1545        | 92 %<br>1428 / 1545          | 89 %<br>1374 / 1545        | 89 %<br>1375 / 1545     | 91 %<br>1406 / 1545              | 90 %<br>1384 / 1545      | 90 %<br>1387 / 1545        | 93 %<br>1430 / 1545         | 91 %<br>1412 / 1545         | 92 %<br>1416 / 1545          | 94 %<br>1461 / 1545        | 90 %<br>1394 / 1545         | 90 %<br>1385 / 1545        | 90 %<br>1452 / 1545        | 94 %<br>1435 / 1545        | 10 %<br>151 / 1545        | 92 %<br>1420 / 1545        | 94 %<br>1448 / 1545        | 90 %<br>1388 / 1545 |                     |                     |
| 89 %<br>1352 / 1516      | 90 %<br>1361 / 1516      | 91 %<br>1384 / 1516       | 91 %<br>1377 / 1516     | 91 %<br>1380 / 1516    | 91 %<br>1375 / 1516    | 91 %<br>1378 / 1516    | 89 %<br>1351 / 1516     | 88 %<br>1337 / 1516     | 92 %<br>1395 / 1516     | 96 %<br>1451 / 1516       | 91 %<br>1375 / 1516        | 91 %<br>1379 / 1516     | 91 %<br>1374 / 1516      | 92 %<br>1372 / 1516     | 91 %<br>1400 / 1516      | 92 %<br>1401 / 1516        | 92 %<br>1390 / 1516          | 90 %<br>1361 / 1516        | 90 %<br>1360 / 1516     | 91 %<br>1378 / 1516              | 91 %<br>1378 / 1516      | 90 %<br>1366 / 1516        | 91 %<br>1387 / 1516         | 92 %<br>1380 / 1516         | 92 %<br>1398 / 1516          | 91 %<br>1391 / 1516        | 92 %<br>1414 / 1516         | 93 %<br>1371 / 1516        | 92 %<br>1388 / 1516        | 93 %<br>1416 / 1516        | 10 %<br>147 / 1516        | 95 %<br>1435 / 1516        | 95 %<br>1435 / 1516        | 94 %<br>1429 / 1516 | 91 %<br>1379 / 1516 |                     |
| 88 %<br>1367 / 1561      | 88 %<br>1377 / 1561      | 90 %<br>1398 / 1561       | 89 %<br>1385 / 1561     | 89 %<br>1387 / 1561    | 88 %<br>1376 / 1561    | 89 %<br>1389 / 1561    | 88 %<br>1368 / 1561     | 87 %<br>1353 / 1561     | 92 %<br>1433 / 1561     | 92 %<br>1434 / 1561       | 91 %<br>1408 / 1561        | 89 %<br>1386 / 1561     | 88 %<br>1368 / 1561      | 90 %<br>1398 / 1561     | 90 %<br>1405 / 1561      | 90 %<br>1425 / 1561        | 89 %<br>1402 / 1561          | 88 %<br>1377 / 1561        | 89 %<br>1417 / 1561     | 89 %<br>1387 / 1561              | 89 %<br>1394 / 1561      | 89 %<br>1393 / 1561        | 91 %<br>1407 / 1561         | 90 %<br>1398 / 1561         | 90 %<br>1391 / 1561          | 91 %<br>1428 / 1561        | 89 %<br>1387 / 1561         | 88 %<br>1377 / 1561        | 10 %<br>154 / 1561         | 91 %<br>1419 / 1561        | 93 %<br>1450 / 1561       | 90 %<br>1411 / 1561        | 92 %<br>1436 / 1561        | 88 %<br>1367 / 1561 |                     |                     |
| 91 %<br>1335 / 1464      | 92 %<br>1343 / 1464      | 93 %<br>1367 / 1464       | 93 %<br>1364 / 1464     | 93 %<br>1359 / 1464    | 94 %<br>1375 / 1464    | 93 %<br>1364 / 1464    | 91 %<br>1344 / 1464     | 92 %<br>1340 / 1464     | 94 %<br>1372 / 1464     | 95 %<br>1388 / 1464       | 93 %<br>1364 / 1464        | 94 %<br>1362 / 1464     | 94 %<br>1370 / 1464      | 93 %<br>1367 / 1464     | 93 %<br>1365 / 1464      | 94 %<br>1379 / 1464        | 93 %<br>1367 / 1464          | 93 %<br>1368 / 1464        | 93 %<br>1365 / 1464     | 93 %<br>1367 / 1464              | 93 %<br>1365 / 1464      | 93 %<br>1367 / 1464        | 93 %<br>1368 / 1464         | 94 %<br>1383 / 1464         | 94 %<br>1387 / 1464          | 93 %<br>1387 / 1464        | 93 %<br>1387 / 1464         | 9 %<br>137 / 1464          | 95 %<br>1385 / 1464        | 95 %<br>1396 / 1464        | 95 %<br>1385 / 1464       | 96 %<br>1404 / 1464        | 94 %<br>1376 / 1464        | 94 %<br>1377 / 1464 |                     |                     |
| 91 %<br>1374 / 1514      | 91 %<br>1383 / 1514      | 93 %<br>1406 / 1514       | 91 %<br>1379 / 1514     | 91 %<br>1376 / 1514    | 91 %<br>1374 / 1514    | 92 %<br>1392 / 1514    | 91 %<br>1375 / 1514     | 89 %<br>1349 / 1514     | 94 %<br>1425 / 1514     | 91 %<br>1385 / 1514       | 92 %<br>1391 / 1514        | 91 %<br>1384 / 1514     | 92 %<br>1389 / 1514      | 91 %<br>1374 / 1514     | 93 %<br>1401 / 1514      | 94 %<br>1423 / 1514        | 93 %<br>1414 / 1514          | 92 %<br>1387 / 1514        | 91 %<br>1384 / 1514     | 93 %<br>1404 / 1514              | 92 %<br>1394 / 1514      | 92 %<br>1391 / 1514        | 93 %<br>1414 / 1514         | 92 %<br>1397 / 1514         | 92 %<br>1398 / 1514          | 91 %<br>1381 / 1514        | 92 %<br>1395 / 1514         | 92 %<br>1387 / 1514        | 9 %<br>1361 / 1514         | 90 %<br>1392 / 1514        | 92 %<br>1388 / 1514       | 92 %<br>1391 / 1514        | 92 %<br>1396 / 1514        | 94 %<br>1430 / 1514 | 91 %<br>1371 / 1514 |                     |
| 90 %<br>1368 / 1524      | 90 %<br>1377 / 1524      | 92 %<br>1409 / 1524       | 91 %<br>1383 / 1524     | 91 %<br>1380 / 1524    | 91 %<br>1381 / 1524    | 92 %<br>1397 / 1524    | 91 %<br>1387 / 1524     | 89 %<br>1369 / 1524     | 94 %<br>1428 / 1524     | 90 %<br>1373 / 1524       | 94 %<br>1423 / 1524        | 91 %<br>1381 / 1524     | 91 %<br>1380 / 1524      | 92 %<br>1397 / 1524     | 91 %<br>1394 / 1524      | 92 %<br>1401 / 1524        | 94 %<br>1429 / 1524          | 92 %<br>1395 / 1524        | 93 %<br>1392 / 1524     | 93 %<br>1401 / 1524              | 92 %<br>1399 / 1524      | 92 %<br>1401 / 1524        | 92 %<br>1399 / 1524         | 92 %<br>1402 / 1524         | 93 %<br>1397 / 1524          | 92 %<br>1399 / 1524        | 92 %<br>1402 / 1524         | 10 %<br>150 / 1524         | 92 %<br>1397 / 1524        | 89 %<br>1381 / 1524        | 91 %<br>1392 / 1524       | 90 %<br>1371 / 1524        | 92 %<br>1387 / 1524        | 92 %<br>1407 / 1524 | 91 %<br>1371 / 1524 |                     |
| 86 %<br>1355 / 1573      | 87 %<br>1368 / 1573      | 88 %<br>1377 / 1573       | 87 %<br>1363 / 1573     | 86 %<br>1360 / 1573    | 87 %<br>1361 / 1573    | 87 %<br>1364 / 1573    | 86 %<br>1360 / 1573     | 87 %<br>1366 / 1573     | 90 %<br>1417 / 1573     | 87 %<br>1369 / 1573       | 89 %<br>1397 / 1573        | 87 %<br>1382 / 1573     | 87 %<br>1386 / 1573      | 87 %<br>1382 / 1573     | 89 %<br>1396 / 1573      | 89 %<br>1402 / 1573        | 89 %<br>1398 / 1573          | 87 %<br>1373 / 1573        | 87 %<br>1373 / 1573     | 87 %<br>1376 / 1573              | 88 %<br>1382 / 1573      | 87 %<br>1372 / 1573        | 89 %<br>1389 / 1573         | 88 %<br>1382 / 1573         | 87 %<br>1367 / 1573          | 88 %<br>1376 / 1573        | 88 %<br>1385 / 1573         | 88 %<br>1383 / 1573        | 87 %<br>1367 / 1573        | 88 %<br>1375 / 1573        | 86 %<br>1353 / 1573       | 87 %<br>1375 / 1573        | 90 %<br>1423 / 1573        | 86 %<br>1351 / 1573 |                     |                     |
| 89 %<br>1372 / 1539      | 90 %<br>1379 / 1539      | 92 %<br>1410 / 1539       | 91 %<br>1389 / 1539     | 91 %<br>1390 / 1539    | 90 %<br>1391 / 1539    | 91 %<br>1395 / 1539    | 89 %<br>1371 / 1539     | 88 %<br>1362 / 1539     | 92 %<br>1422 / 1539     | 92 %<br>1420 / 1539       | 91 %<br>1402 / 1539        | 91 %<br>1397 / 1539     | 91 %<br>1399 / 1539      | 91 %<br>1401 / 1539     | 92 %<br>1417 / 1539      | 92 %<br>1412 / 1539        | 92 %<br>1407 / 1539          | 90 %<br>1387 / 1539        | 90 %<br>1382 / 1539     | 91 %<br>1406 / 1539              | 91 %<br>1407 / 1539      | 92 %<br>1413 / 1539        | 92 %<br>1409 / 1539         | 92 %<br>1412 / 1539         | 93 %<br>1423 / 1539          | 93 %<br>1425 / 1539        | 90 %<br>1381 / 1539         | 91 %<br>1403 / 1539        | 91 %<br>1408 / 1539        | 90 %<br>1448 / 1539        | 92 %<br>1422 / 1539       | 94 %<br>1446 / 1539        | 91 %<br>1394 / 1539        |                     |                     |                     |
| 89 %<br>1356 / 1532      | 89 %<br>1363 / 1532      | 91 %<br>1390 / 1532       | 91 %<br>1390 / 1532     | 90 %<br>1385 / 1532    | 90 %<br>1376 / 1532    | 91 %<br>1390 / 1532    | 88 %<br>1353 / 1532     | 89 %<br>1356 / 1532     | 91 %<br>1400 / 1532     | 92 %<br>1383 / 1532       | 91 %<br>1402 / 1532        | 90 %<br>1386 / 1532     | 91 %<br>1395 / 1532      | 91 %<br>1391 / 1532     | 91 %<br>1382 / 1532      | 92 %<br>1402 / 1532        | 92 %<br>1404 / 1532          | 88 %<br>1388 / 1532        | 87 %<br>1387 / 1532     | 91 %<br>1387 / 1532              | 91 %<br>1387 / 1532      | 91 %<br>1387 / 1532        | 92 %<br>1396 / 1532         | 92 %<br>1387 / 1532         | 93 %<br>1428 / 1532          | 10 %<br>152 / 1532         | 93 %<br>1426 / 1532         | 89 %<br>1366 / 1532        | 91 %<br>1398 / 1532        | 90 %<br>1376 / 1532        | 91 %<br>1380 / 1532       | 92 %<br>1397 / 1532        | 94 %<br>1418 / 1532        | 90 %<br>1380 / 1532 |                     |                     |
| 89 %<br>1365 / 1532      | 90 %<br>1375 / 1532      | 92 %<br>1409 / 1532       | 91 %<br>1393 / 1532     | 91 %<br>1382 / 1532    | 91 %<br>1381 / 1532    | 91 %<br>1401 / 1532    | 89 %<br>1364 / 1532     | 89 %<br>1356 / 1532     | 92 %<br>1415 / 1532     | 92 %<br>1407 / 1532       | 91 %<br>1400 / 1532        | 90 %<br>1384 / 1532     | 91 %<br>1390 / 1532      | 91 %<br>1387 / 1532     | 92 %<br>1406 / 1532      | 93 %<br>1426 / 1532        | 92 %<br>1407 / 1532          | 91 %<br>1393 / 1532        | 90 %<br>1387 / 1532     | 91 %<br>1392 / 1532              | 91 %<br>1392 / 1532      | 92 %<br>1401 / 1532        | 92 %<br>1397 / 1532         | 92 %<br>1388 / 1532         | 93 %<br>1399 / 1532          | 91 %<br>1370 / 1532        | 92 %<br>1410 / 1532         | 92 %<br>1404 / 1532        | 92 %<br>1414 / 1532        | 92 %<br>1408 / 1532        | 92 %<br>1427 / 1532       | 93 %<br>1418 / 1532        | 91 %<br>1397 / 1532        |                     |                     |                     |
| 91 %<br>1397 / 1543      | 91 %<br>1404 / 1543      | 92 %<br>1413 / 1543       | 90 %<br>1389 / 1543     | 91 %<br>1402 / 1543    | 90 %<br>1388 / 1543    | 91 %<br>1407 / 1543    | 88 %<br>1395 / 1543     | 88 %<br>1360 / 1543     | 93 %<br>1437 / 1543     | 94 %<br>1383 / 1543       | 90 %<br>1447 / 1543        | 90 %<br>1386 / 1543     | 90 %<br>1388 / 1543      | 90 %<br>1396 / 1543     | 91 %<br>1397 / 1543      | 91 %<br>1409 / 1543        | 95 %<br>1460 / 1543          | 90 %<br>1400 / 1543        | 90 %<br>1395 / 1543     | 92 %<br>1423 / 1543              | 93 %<br>1431 / 1543      | 92 %<br>1415 / 1543        | 92 %<br>1416 / 1543         | 10 %<br>152 / 1543          | 93 %<br>1393 / 1543          | 91 %<br>1401 / 1543        | 91 %<br>1399 / 1543         | 91 %<br>1403 / 1543        | 92 %<br>1423 / 1543        | 91 %<br>1397 / 1543        | 89 %<br>1368 / 1543       | 91 %<br>1409 / 1543        | 91 %<br>1383 / 1543        | 89 %<br>1410 / 1543 | 91 %<br>1398 / 1543 | 89 %<br>1409 / 1543 |
| 86 %<br>1368 / 1587      | 87 %<br>1374 / 1587      | 90 %<br>1427 / 1587       | 88 %<br>1384 / 1587     | 87 %<br>1383 / 1587    | 87 %<br>1378 / 1587    | 88 %<br>1388 / 1587    | 86 %<br>1368 / 1587     | 87 %<br>1376 / 1587     | 91 %<br>1427 / 1587     | 91 %<br>1381 / 1587       | 90 %<br>1423 / 1587        | 87 %<br>1387 / 1587     | 88 %<br>1387 / 1587      | 87 %<br>1385 / 1587     | 89 %<br>1401 / 1587      | 90 %<br>1426 / 1587        | 90 %<br>1420 / 1587          | 87 %<br>1387 / 1587        | 87 %<br>1387 / 1587     | 88 %<br>1407 / 1587              | 89 %<br>1387 / 1587      | 89 %<br>1387 / 1587        | 88 %<br>1387 / 1587         | 88 %<br>1387 / 1587         | 88 %<br>1387 / 1587          | 88 %<br>1387 / 1587        | 85 %<br>1411 / 1587         | 89 %<br>1413 / 1587        | 87 %<br>1383 / 1587        | 90 %<br>1426 / 1587        | 88 %<br>1390 / 1587       | 90 %<br>1430 / 1587        | 87 %<br>1381 / 1587        |                     |                     |                     |
| 88 %<br>1362 / 1555      | 88 %<br>1370 / 1555      | 91 %<br>1411 / 1555       | 89 %<br>1368 / 1555     | 89 %<br>1377 / 1555    | 88 %<br>1373 / 1555    | 90 %<br>1395 / 1555    | 88 %<br>1362 / 1555     | 88 %<br>1363 / 1555     | 91 %<br>1408 / 1555     | 88 %<br>1374 / 1555       | 91 %<br>1408 / 1555        | 89 %<br>1382 / 1555     | 89 %<br>1386 / 1555      | 89 %<br>1391 / 1555     | 89 %<br>1389 / 1555      | 91 %<br>1401 / 1555        | 91 %<br>1417 / 1555          | 90 %<br>1394 / 1555        | 89 %<br>1387 / 1555     | 91 %<br>1410 / 1555              | 90 %<br>1396 / 1555      | 9 %<br>147 / 1555          | 91 %<br>1417 / 1555         | 91 %<br>1415 / 1555         | 89 %<br>13                   |                            |                             |                            |                            |                            |                           |                            |                            |                     |                     |                     |
