# Supplementary material for: Pan-Genome Analysis of Human Gastric Pathogen H. pylori: Comparative Genomics and Pathogenomics Approaches to Identify Regions Associated with Pathogenicity and Prediction of Potential Core Therapeutic Targets
Source: Biomed Res Int. 2015 Jan 29;2015:139580. doi: 10.1155/2015/139580 (PMC4325212; doi:10.1155/2015/139580)
Supplement: Supplementary file 1 — The supplementary data provides insight view to results originally extracted from different tools and databases. Because of availability of large dataset it was not possible to incorporate all of it the article. You can access the additional files having the composition of core genome families of all 1193 genomes (Additional file 1). Additional file 2 contains BLAST data extracted from DEG, number of homologs along with their AC number against all query proteins. Additional file 3 contains BLAST result of gene families against Human genome to find non-human homologs. Protein sequence of all gene families has been provided in Additional file 4. Additional file 5 gives a comprehensive view of all predicted epitopes along with their location and their predictions as antigenic or not. [file 139580.f1.zip]

Archive with 6 entries (5 files):
- supplementary material/
- supplementary material/Additional figure 1.pdf
- supplementary material/Additional file 2.xlsx
- supplementary material/Additional file 3.xlsx
- supplementary material/Additional file 4.txt
- supplementary material/Additional file 5.xlsx
