# Supplementary material for: Pan-Genome Analysis of Human Gastric Pathogen H. pylori: Comparative Genomics and Pathogenomics Approaches to Identify Regions Associated with Pathogenicity and Prediction of Potential Core Therapeutic Targets
Source: Biomed Res Int. 2015 Jan 29;2015:139580. doi: 10.1155/2015/139580 (PMC4325212; doi:10.1155/2015/139580)
Supplement: Supplementary file 1 — The supplementary data provides insight view to results originally extracted from different tools and databases. Because of availability of large dataset it was not possible to incorporate all of it the article. You can access the additional files having the composition of core genome families of all 1193 genomes (Additional file 1). Additional file 2 contains BLAST data extracted from DEG, number of homologs along with their AC number against all query proteins. Additional file 3 contains BLAST result of gene families against Human genome to find non-human homologs. Protein sequence of all gene families has been provided in Additional file 4. Additional file 5 gives a comprehensive view of all predicted epitopes along with their location and their predictions as antigenic or not. [file 139580.f1.zip › supplementary material/Additional file 2.xlsx]

## Sheet: EGFs
Your Query Protein	No. of homologs in DEG	DEG AC Number
/gene_family="566" /family_size="39"	15	DEG10210034; DEG10340079; DEG10290110; DEG10150288; DEG10130341; DEG10200389; DEG10050537;DEG10170032; DEG10220097; DEG10100567; DEG10250702; DEG10120187; DEG10070125; DEG10030131;DEG10230226;
/gene_family="489" /family_size="39"	7	DEG10100483; DEG10240080; DEG10130393; DEG10270541; DEG10200308; DEG10280099; DEG10250588;
/gene_family="1318" /family_size="39"	16	DEG10220052; DEG10120316; DEG10190036; DEG10160041; DEG10240241; DEG10290158; DEG10150100;DEG10110020; DEG10030442; DEG10180046; DEG10230236; DEG10320040; DEG10330042; DEG10200256;DEG10280066; DEG10130201;
/gene_family="213" /family_size="39"	21	DEG10160232; DEG10020231; DEG10340375; DEG10100209; DEG10130110; DEG10080106; DEG10290344;DEG10250246; DEG10190189; DEG10070059; DEG10330235; DEG10010252; DEG10200328; DEG10320254;DEG10120111; DEG10170295; DEG10220236; DEG10270240; DEG10230099; DEG10280119; DEG10030507;
/gene_family="525" /family_size="39"	1	DEG10310090;
/gene_family="1502" /family_size="39"	2	DEG10080119; DEG10310207;
/gene_family="1613" /family_size="39"	1	DEG10080240;
/gene_family="144" /family_size="39"	11	DEG10270492; DEG10130278; DEG10050031; DEG10330347; DEG10180589; DEG10100432; DEG10120240;DEG10280097; DEG10250530; DEG10160342; DEG10290077;
/gene_family="673" /family_size="39"	23	DEG10290154; DEG10330039; DEG10130198; DEG10120045; DEG10100372; DEG10110018; DEG10320038;DEG10250202; DEG10340094; DEG10220051; DEG10190033; DEG10200259; DEG10280063; DEG10240238;DEG10250456; DEG10030446; DEG10210195; DEG10270424; DEG10230237; DEG10160038; DEG10170159;DEG10150097; DEG10180044;
/gene_family="692" /family_size="39"	1	DEG10250505;
/gene_family="250" /family_size="39"	4	DEG10320151; DEG10110116; DEG10180133; DEG10080217;
/gene_family="680" /family_size="48"	1	DEG10080281;
/gene_family="699" /family_size="39"	17	DEG10150301; DEG10080163; DEG10290389; DEG10240167; DEG10050211; DEG10230161; DEG10340493;DEG10330287; DEG10160283; DEG10130471; DEG10110198; DEG10180536; DEG10200043; DEG10030029;DEG10320301; DEG10310091; DEG10190246;
/gene_family="1050" /family_size="39"	1	DEG10080107;
/gene_family="1663" /family_size="39"	4	DEG10280253; DEG10180330; DEG10010079; DEG10280252;
/gene_family="244" /family_size="39"	1	DEG10080181;
/gene_family="1295" /family_size="39"	1	DEG10080184;
/gene_family="1092" /family_size="115"	1	DEG10080140;
/gene_family="1222" /family_size="39"	17	DEG10160288; DEG10130443; DEG10150002; DEG10330292; DEG10280530; DEG10320299; DEG10050335;DEG10110194; DEG10200166; DEG10240047; DEG10180529; DEG10290007; DEG10120174; DEG10030005;DEG10310160; DEG10010180; DEG10210171;
/gene_family="263" /family_size="39"	25	DEG10060162; DEG10290190; DEG10010204; DEG10100278; DEG10050468; DEG10200121; DEG10280242;DEG10190118; DEG10230086; DEG10130383; DEG10340352; DEG10320131; DEG10020101; DEG10170120;DEG10330100; DEG10120202; DEG10160098; DEG10150140; DEG10210098; DEG10220370; DEG10270315;DEG10080066; DEG10250344; DEG10030248; DEG10140134;
/gene_family="1353" /family_size="39"	1	DEG10220144;
/gene_family="282" /family_size="39"	1	DEG10310146;
/gene_family="1072" /family_size="39"	12	DEG10120282; DEG10230081; DEG10170031; DEG10220438; DEG10340189; DEG10020037; DEG10030433;DEG10210005; DEG10010016; DEG10310193; DEG10190043; DEG10180053;
/gene_family="357" /family_size="39"	32	DEG10030594; DEG10060308; DEG10120270; DEG10220196; DEG10100421; DEG10080016; DEG10160049;DEG10340211; DEG10130387; DEG10250516; DEG10210142; DEG10110078; DEG10050493; DEG10180054;DEG10170248; DEG10290210; DEG10160093; DEG10320127; DEG10230015; DEG10140296; DEG10210193;DEG10020192; DEG10190121; DEG10320048; DEG10070202; DEG10270481; DEG10190044; DEG10330095;DEG10180289; DEG10200074; DEG10330050; …
/gene_family="390" /family_size="186"	1	DEG10080080;
/gene_family="1311" /family_size="39"	1	DEG10080004;
/gene_family="1571" /family_size="39"	1	DEG10080243;
/gene_family="276" /family_size="39"	23	DEG10330076; DEG10120230; DEG10240126; DEG10270556; DEG10150228; DEG10280200; DEG10180353;DEG10190133; DEG10050607; DEG10070171; DEG10030257; DEG10020062; DEG10100498; DEG10290230;DEG10200423; DEG10010144; DEG10130119; DEG10160073; DEG10250609; DEG10060196; DEG10270107;DEG10210072; DEG10170065;
/gene_family="1075" /family_size="39"	5	DEG10240265; DEG10200445; DEG10070101; DEG10260042; DEG10310059;
/gene_family="1142" /family_size="39"	4	DEG10340010; DEG10220107; DEG10300065; DEG10230183;
/gene_family="258" /family_size="39"	1	DEG10080166;
/gene_family="248" /family_size="39"	8	DEG10330288; DEG10330289; DEG10160285; DEG10080047; DEG10180535; DEG10160284; DEG10260083;DEG10240166;
/gene_family="1195" /family_size="39"	1	DEG10080141;
/gene_family="198" /family_size="39"	1	DEG10080029;
/gene_family="1447" /family_size="39"	1	DEG10310101;
/gene_family="452" /family_size="39"	2	DEG10310169; DEG10080134;
/gene_family="1309" /family_size="39"	1	DEG10310116;
/gene_family="1452" /family_size="39"	1	DEG10310110;
/gene_family="174" /family_size="39"	50	DEG10240125; DEG10070065; DEG10270524; DEG10100467; DEG10330294; DEG10280268; DEG10060239;DEG10070070; DEG10110193; DEG10320217; DEG10280321; DEG10080130; DEG10020123; DEG10160183;DEG10340351; DEG10020124; DEG10230083; DEG10230049; DEG10210140; DEG10180523; DEG10180407;DEG10330185; DEG10190158; DEG10120191; DEG10030109; DEG10130268; DEG10170147; DEG10170146;DEG10320298; DEG10340288; DEG10120343; …
/gene_family="222" /family_size="39"	100	DEG10030734; DEG10100216; DEG10100215; DEG10340077; DEG10330114; DEG10100381; DEG10280312;DEG10320088; DEG10310171; DEG10220139; DEG10250335; DEG10130324; DEG10320087; DEG10150123;DEG10180246; DEG10300009; DEG10260086; DEG10180475; DEG10050060; DEG10320118; DEG10030320;DEG10330135; DEG10240281; DEG10290200; DEG10110217; DEG10080223; DEG10210103; DEG10200045;DEG10110057; DEG10070110; DEG10250180; …
/gene_family="84" /family_size="39"	7	DEG10220298; DEG10340345; DEG10300083; DEG10170083; DEG10140135; DEG10050343; DEG10020075;
/gene_family="114" /family_size="39"	2	DEG10080183; DEG10080182;
/gene_family="1442" /family_size="39"	13	DEG10030155; DEG10210141; DEG10300096; DEG10080191; DEG10300014; DEG10070064; DEG10250641;DEG10260070; DEG10150219; DEG10200364; DEG10300012; DEG10130462; DEG10270578;
/gene_family="446" /family_size="39"	1	DEG10080195;
/gene_family="1748" /family_size="39"	15	DEG10230272; DEG10170231; DEG10290063; DEG10120273; DEG10070089; DEG10080133; DEG10030492;DEG10130391; DEG10220378; DEG10240178; DEG10250507; DEG10190252; DEG10300025; DEG10060231;DEG10270476;
/gene_family="643" /family_size="39"	21	DEG10220167; DEG10240056; DEG10070123; DEG10020257; DEG10140221; DEG10010056; DEG10290187;DEG10030207; DEG10130162; DEG10210026; DEG10190055; DEG10110036; DEG10170313; DEG10200155;DEG10310077; DEG10120257; DEG10180089; DEG10160162; DEG10340158; DEG10330165; DEG10320059;
/gene_family="202" /family_size="39"	8	DEG10150082; DEG10030162; DEG10290209; DEG10240274; DEG10280006; DEG10200220; DEG10340412;DEG10180383;
/gene_family="1497" /family_size="39"	17	DEG10230131; DEG10180222; DEG10220129; DEG10120019; DEG10320155; DEG10130438; DEG10190109;DEG10030260; DEG10290265; DEG10100229; DEG10330109; DEG10150061; DEG10250270; DEG10050102;DEG10280413; DEG10160107; DEG10270257;
/gene_family="214" /family_size="39"	2	DEG10220038; DEG10340281;
/gene_family="301" /family_size="39"	14	DEG10070087; DEG10080276; DEG10050179; DEG10220096; DEG10130116; DEG10180517; DEG10200023;DEG10070227; DEG10150022; DEG10170139; DEG10280217; DEG10270256; DEG10250268; DEG10290060;
/gene_family="823" /family_size="39"	7	DEG10340398; DEG10080042; DEG10180135; DEG10310048; DEG10220461; DEG10230115; DEG10310129;
/gene_family="1495" /family_size="39"	21	DEG10160254; DEG10140302; DEG10050208; DEG10290379; DEG10010080; DEG10250172; DEG10130149;DEG10100512; DEG10080294; DEG10180549; DEG10330257; DEG10270168; DEG10270571; DEG10020219;DEG10170278; DEG10110204; DEG10260092; DEG10100141; DEG10050427; DEG10250627; DEG10340299;
/gene_family="197" /family_size="39"	8	DEG10330334; DEG10080272; DEG10240152; DEG10160330; DEG10200413; DEG10120104; DEG10290071;DEG10190280;
/gene_family="173" /family_size="39"	4	DEG10220156; DEG10310188; DEG10050314; DEG10270284;
/gene_family="1306" /family_size="39"	32	DEG10340054; DEG10030158; DEG10290203; DEG10250595; DEG10050462; DEG10220155; DEG10020180;DEG10200232; DEG10020079; DEG10200236; DEG10240212; DEG10250285; DEG10100244; DEG10100490;DEG10210119; DEG10010234; DEG10170226; DEG10060277; DEG10270547; DEG10120177; DEG10280316;DEG10320201; DEG10110161; DEG10160058; DEG10230199; DEG10330059; DEG10070166; DEG10170086;DEG10130211; DEG10180388; DEG10140059; …
/gene_family="540" /family_size="39"	10	DEG10130285; DEG10220078; DEG10050529; DEG10280532; DEG10340076; DEG10250628; DEG10200469;DEG10270572; DEG10230223; DEG10220317;
/gene_family="407" /family_size="39"	1	DEG10050571;
/gene_family="604" /family_size="39"	2	DEG10270534; DEG10250581;
/gene_family="748" /family_size="39"	3	DEG10200295; DEG10080061; DEG10280126;
/gene_family="9" /family_size="39"	1	DEG10310041;
/gene_family="639" /family_size="39"	15	DEG10100265; DEG10250633; DEG10100378; DEG10100150; DEG10250185; DEG10130114; DEG10110107;DEG10270181; DEG10280233; DEG10280391; DEG10130045; DEG10050115; DEG10250328; DEG10250463;DEG10270305;
/gene_family="47" /family_size="39"	25	DEG10290199; DEG10230169; DEG10030367; DEG10120129; DEG10330113; DEG10290201; DEG10330115;DEG10050561; DEG10030365; DEG10340199; DEG10320117; DEG10190093; DEG10240218; DEG10190095;DEG10230076; DEG10180186; DEG10150124; DEG10160111; DEG10150122; DEG10050556; DEG10130325;DEG10160113; DEG10320119; DEG10180184; DEG10200266;
/gene_family="594" /family_size="39"	4	DEG10300079; DEG10190180; DEG10050604; DEG10020030;
/gene_family="268" /family_size="39"	15	DEG10270382; DEG10060189; DEG10100332; DEG10220114; DEG10030484; DEG10340067; DEG10240102;DEG10230213; DEG10330010; DEG10290372; DEG10160009; DEG10250415; DEG10140188; DEG10180013;DEG10070013;
/gene_family="99" /family_size="39"	4	DEG10080307; DEG10250577; DEG10260084; DEG10050452;
/gene_family="1150" /family_size="40"	2	DEG10060341; DEG10020067;
/gene_family="541" /family_size="39"	22	DEG10160166; DEG10130437; DEG10240365; DEG10220460; DEG10100424; DEG10010170; DEG10320057;DEG10330169; DEG10110031; DEG10190052; DEG10050524; DEG10290144; DEG10120207; DEG10030185;DEG10340128; DEG10280198; DEG10150062; DEG10230281; DEG10180080; DEG10270486; DEG10250522;DEG10200302;
/gene_family="373" /family_size="39"	2	DEG10080025; DEG10130463;
/gene_family="476" /family_size="39"	8	DEG10050444; DEG10220254; DEG10270327; DEG10100297; DEG10250360; DEG10230257; DEG10180218;DEG10340427;
/gene_family="1472" /family_size="39"	4	DEG10050052; DEG10230223; DEG10340076; DEG10220078;
/gene_family="971" /family_size="39"	1	DEG10200044;
/gene_family="1861" /family_size="39"	9	DEG10230271; DEG10260033; DEG10300077; DEG10340373; DEG10230098; DEG10340112; DEG10290358;DEG10310161; DEG10300022;
/gene_family="1121" /family_size="39"	3	DEG10250234; DEG10100195; DEG10270229;
/gene_family="161" /family_size="39"	1	DEG10310222;
/gene_family="698" /family_size="39"	5	DEG10280114; DEG10270395; DEG10250433; DEG10100346; DEG10130099;
/gene_family="949" /family_size="39"	5	DEG10250271; DEG10060174; DEG10020104; DEG10270258; DEG10100231;
/gene_family="338" /family_size="39"	8	DEG10100041; DEG10130178; DEG10270064; DEG10240279; DEG10250063; DEG10030539; DEG10280506;DEG10220310;
/gene_family="923" /family_size="39"	1	DEG10310186;
/gene_family="1019" /family_size="39"	4	DEG10250428; DEG10100343; DEG10270391; DEG10080311;
/gene_family="956" /family_size="39"	5	DEG10080096; DEG10340206; DEG10270450; DEG10310068; DEG10250480;
/gene_family="335" /family_size="78"	1	DEG10310177;
/gene_family="953" /family_size="39"	21	DEG10190186; DEG10200049; DEG10160229; DEG10220349; DEG10060199; DEG10210107; DEG10080051;DEG10320251; DEG10240121; DEG10150274; DEG10290319; DEG10100392; DEG10280433; DEG10340141;DEG10120166; DEG10330232; DEG10010195; DEG10020184; DEG10030077; DEG10140126; DEG10170236;
/gene_family="495" /family_size="39"	5	DEG10020142; DEG10280079; DEG10160189; DEG10080023; DEG10330191;
/gene_family="1721" /family_size="39"	14	DEG10140194; DEG10290217; DEG10180585; DEG10270470; DEG10200101; DEG10060017; DEG10100408;DEG10070028; DEG10240206; DEG10250496; DEG10120006; DEG10030245; DEG10020167; DEG10170204;
/gene_family="30" /family_size="39"	26	DEG10010038; DEG10280180; DEG10160303; DEG10190226; DEG10180503; DEG10030534; DEG10330307;DEG10240333; DEG10120056; DEG10130429; DEG10050268; DEG10230151; DEG10110187; DEG10220417;DEG10020275; DEG10060125; DEG10270126; DEG10340478; DEG10200138; DEG10100106; DEG10290035;DEG10250137; DEG10210013; DEG10170331; DEG10140238; DEG10320286;
/gene_family="1376" /family_size="39"	4	DEG10180476; DEG10220248; DEG10340510; DEG10230134;
/gene_family="37" /family_size="39"	24	DEG10050631; DEG10330033; DEG10010057; DEG10120124; DEG10270514; DEG10060143; DEG10030451;DEG10220400; DEG10340460; DEG10180038; DEG10320032; DEG10200355; DEG10290149; DEG10140220;DEG10250554; DEG10060264; DEG10020214; DEG10300061; DEG10080251; DEG10160032; DEG10190027;DEG10070164; DEG10210132; DEG10170270;
/gene_family="854" /family_size="39"	24	DEG10030050; DEG10060296; DEG10170043; DEG10120336; DEG10240342; DEG10150032; DEG10220329;DEG10160260; DEG10110211; DEG10330263; DEG10340486; DEG10290025; DEG10140107; DEG10020046;DEG10310055; DEG10200083; DEG10280379; DEG10010027; DEG10210113; DEG10180570; DEG10130051;DEG10190277; DEG10320330; DEG10100091;
/gene_family="964" /family_size="39"	4	DEG10190099; DEG10290241; DEG10180197; DEG10260032;
/gene_family="162" /family_size="39"	18	DEG10200367; DEG10150105; DEG10190042; DEG10320046; DEG10160047; DEG10130379; DEG10110022;DEG10120322; DEG10010212; DEG10020198; DEG10170254; DEG10030434; DEG10280100; DEG10180052;DEG10070026; DEG10050139; DEG10210175; DEG10330048;
/gene_family="32" /family_size="39"	22	DEG10170284; DEG10060323; DEG10010077; DEG10270080; DEG10340356; DEG10320342; DEG10030742;DEG10180584; DEG10100059; DEG10250085; DEG10120323; DEG10110220; DEG10290080; DEG10330342;DEG10100537; DEG10200093; DEG10230091; DEG10210039; DEG10220290; DEG10160337; DEG10070105;DEG10240163;
/gene_family="1240" /family_size="39"	39	DEG10190182; DEG10150286; DEG10230160; DEG10170049; DEG10010137; DEG10060366; DEG10210198;DEG10010033; DEG10100449; DEG10270224; DEG10180508; DEG10180568; DEG10250229; DEG10130160;DEG10280414; DEG10110170; DEG10070012; DEG10160222; DEG10100100; DEG10120342; DEG10100190;DEG10270506; DEG10060071; DEG10220335; DEG10330225; DEG10020099; DEG10050236; DEG10270120;DEG10220276; DEG10180471; DEG10140150; …
/gene_family="371" /family_size="39"	2	DEG10310163; DEG10340001;
/gene_family="1111" /family_size="39"	8	DEG10150078; DEG10290204; DEG10030159; DEG10240213; DEG10180387; DEG10130210; DEG10080035;DEG10310024;
/gene_family="449" /family_size="39"	3	DEG10310035; DEG10300098; DEG10130380;
/gene_family="287" /family_size="39"	100	DEG10030734; DEG10100216; DEG10100215; DEG10340077; DEG10330114; DEG10330295; DEG10100381;DEG10050394; DEG10320088; DEG10050540; DEG10250225; DEG10250335; DEG10130324; DEG10320087;DEG10150123; DEG10300009; DEG10050262; DEG10260086; DEG10050060; DEG10070110; DEG10050464;DEG10030320; DEG10330135; DEG10060049; DEG10110217; DEG10250613; DEG10080223; DEG10200045;DEG10320297; DEG10110057; DEG10320118; …
/gene_family="924" /family_size="39"	8	DEG10290315; DEG10240045; DEG10030080; DEG10130370; DEG10200214; DEG10280045; DEG10340154;DEG10220454;
/gene_family="553" /family_size="39"	23	DEG10170040; DEG10120339; DEG10240345; DEG10060063; DEG10150030; DEG10290022; DEG10280260;DEG10160262; DEG10080221; DEG10100089; DEG10340489; DEG10330265; DEG10020043; DEG10250123;DEG10200088; DEG10130048; DEG10320328; DEG10310053; DEG10140006; DEG10050166; DEG10030047;DEG10220332; DEG10210148;
/gene_family="871" /family_size="39"	1	DEG10310067;
/gene_family="1298" /family_size="39"	12	DEG10240406; DEG10200475; DEG10230274; DEG10340115; DEG10020017; DEG10240364; DEG10250768;DEG10170347; DEG10100611; DEG10270685; DEG10280299; DEG10220036;
/gene_family="1073" /family_size="39"	8	DEG10240095; DEG10280332; DEG10270567; DEG10120373; DEG10310201; DEG10180420; DEG10200275;DEG10080245;
/gene_family="1009" /family_size="39"	1	DEG10080081;
/gene_family="22" /family_size="39"	24	DEG10150052; DEG10290054; DEG10100548; DEG10060147; DEG10130410; DEG10310204; DEG10030514;DEG10210028; DEG10160323; DEG10190207; DEG10110178; DEG10240315; DEG10280160; DEG10330327;DEG10170309; DEG10120076; DEG10050286; DEG10010061; DEG10340457; DEG10020253; DEG10140216;DEG10220396; DEG10320267; DEG10200157;
/gene_family="240" /family_size="39"	1	DEG10310103;
/gene_family="419" /family_size="39"	6	DEG10320151; DEG10110134; DEG10180115; DEG10110116; DEG10180133; DEG10080217;
/gene_family="136" /family_size="41"	20	DEG10170145; DEG10330118; DEG10100359; DEG10080088; DEG10290258; DEG10240201; DEG10150131;DEG10220369; DEG10120299; DEG10030390; DEG10340030; DEG10320114; DEG10130140; DEG10160116;DEG10280022; DEG10190090; DEG10310046; DEG10200211; DEG10250446; DEG10010119;
/gene_family="674" /family_size="39"	14	DEG10130031; DEG10160328; DEG10180488; DEG10330332; DEG10200038; DEG10280464; DEG10150005;DEG10320262; DEG10190202; DEG10140270; DEG10310020; DEG10080137; DEG10120018; DEG10070178;
/gene_family="183" /family_size="39"	15	DEG10330290; DEG10150056; DEG10220105; DEG10060094; DEG10050317; DEG10070219; DEG10200329;DEG10270608; DEG10310150; DEG10160286; DEG10070200; DEG10260045; DEG10230103; DEG10250680;DEG10100550;
/gene_family="298" /family_size="39"	4	DEG10200415; DEG10080205; DEG10070181; DEG10130029;
/gene_family="1436" /family_size="39"	17	DEG10010138; DEG10080177; DEG10150285; DEG10180470; DEG10050538; DEG10240083; DEG10170168;DEG10160220; DEG10200008; DEG10060344; DEG10340521; DEG10290115; DEG10130070; DEG10330223;DEG10030137; DEG10120152; DEG10220366;
/gene_family="1283" /family_size="39"	1	DEG10310130;
/gene_family="803" /family_size="39"	1	DEG10080164;
/gene_family="577" /family_size="39"	4	DEG10030274; DEG10080154; DEG10300037; DEG10280118;
/gene_family="1084" /family_size="39"	7	DEG10200004; DEG10100385; DEG10080009; DEG10280535; DEG10310208; DEG10240055; DEG10130204;
/gene_family="1135" /family_size="39"	15	DEG10130027; DEG10240357; DEG10140096; DEG10250244; DEG10290396; DEG10200417; DEG10100206;DEG10060329; DEG10080207; DEG10270238; DEG10030560; DEG10280103; DEG10070183; DEG10210079;DEG10120358;
/gene_family="81" /family_size="39"	7	DEG10250622; DEG10280327; DEG10270564; DEG10240090; DEG10120378; DEG10200280; DEG10270022;
/gene_family="1029" /family_size="39"	22	DEG10170312; DEG10050175; DEG10010058; DEG10100549; DEG10320086; DEG10250679; DEG10130081;DEG10210027; DEG10030338; DEG10190071; DEG10240318; DEG10120192; DEG10330142; DEG10150146;DEG10340459; DEG10160139; DEG10020256; DEG10080250; DEG10290248; DEG10280500; DEG10200327;DEG10220399;
/gene_family="1080" /family_size="39"	24	DEG10170310; DEG10150051; DEG10290053; DEG10060146; DEG10130411; DEG10230144; DEG10030515;DEG10280161; DEG10160322; DEG10180491; DEG10240316; DEG10190208; DEG10330326; DEG10120075;DEG10340458; DEG10050285; DEG10010060; DEG10270607; DEG10020254; DEG10140217; DEG10220397;DEG10200156; DEG10250678; DEG10320268;
/gene_family="450" /family_size="39"	36	DEG10130313; DEG10170048; DEG10050638; DEG10020086; DEG10020099; DEG10220422; DEG10280185;DEG10010033; DEG10110190; DEG10010032; DEG10270119; DEG10180509; DEG10130146; DEG10340483;DEG10140160; DEG10070012; DEG10330302; DEG10320291; DEG10300067; DEG10060071; DEG10120051;DEG10290087; DEG10230154; DEG10160298; DEG10210198; DEG10100099; DEG10050188; DEG10200381;DEG10220276; DEG10190231; DEG10260053; …
/gene_family="1525" /family_size="39"	24	DEG10290055; DEG10100547; DEG10140283; DEG10230143; DEG10060252; DEG10250677; DEG10030513;DEG10020203; DEG10160324; DEG10190206; DEG10240314; DEG10200336; DEG10130409; DEG10010215;DEG10330328; DEG10120077; DEG10050287; DEG10210213; DEG10340456; DEG10270606; DEG10280132;DEG10220395; DEG10320266; DEG10170258;
/gene_family="710" /family_size="39"	2	DEG10180462; DEG10270020;
/gene_family="111" /family_size="39"	8	DEG10310037; DEG10290301; DEG10150059; DEG10320055; DEG10160168; DEG10180077; DEG10070027;DEG10330171;
/gene_family="1351" /family_size="39"	2	DEG10080032; DEG10310033;
/gene_family="1429" /family_size="39"	1	DEG10030284;
/gene_family="1520" /family_size="39"	14	DEG10120284; DEG10160056; DEG10250204; DEG10060325; DEG10130263; DEG10150275; DEG10280131;DEG10010253; DEG10180392; DEG10270194; DEG10240161; DEG10140131; DEG10330057; DEG10020234;
/gene_family="344" /family_size="39"	11	DEG10250586; DEG10100480; DEG10260017; DEG10330110; DEG10270538; DEG10280489; DEG10240059;DEG10160108; DEG10050347; DEG10130080; DEG10110075;
/gene_family="23" /family_size="39"	20	DEG10170302; DEG10020242; DEG10180545; DEG10270602; DEG10240015; DEG10280494; DEG10210196;DEG10200027; DEG10120122; DEG10290391; DEG10150333; DEG10010067; DEG10190260; DEG10310182;DEG10100542; DEG10070011; DEG10320312; DEG10250670; DEG10130187; DEG10070113;
/gene_family="125" /family_size="39"	1	DEG10290192;
/gene_family="224" /family_size="39"	2	DEG10080183; DEG10080182;
/gene_family="622" /family_size="39"	8	DEG10080191; DEG10150219; DEG10070064; DEG10110115; DEG10300014; DEG10210141; DEG10300012;DEG10010263;
/gene_family="618" /family_size="39"	60	DEG10330352; DEG10320349; DEG10290306; DEG10160148; DEG10200472; DEG10060273; DEG10010110;DEG10060284; DEG10010199; DEG10250186; DEG10050502; DEG10230180; DEG10020186; DEG10160347;DEG10230300; DEG10330151; DEG10020112; DEG10320072; DEG10220171; DEG10050332; DEG10180113;DEG10280125; DEG10290105; DEG10200161; DEG10120199; DEG10140025; DEG10210162; DEG10210040;DEG10150075; DEG10210063; DEG10310102; …
/gene_family="945" /family_size="39"	9	DEG10200007; DEG10020139; DEG10180469; DEG10270500; DEG10250540; DEG10240084; DEG10260064;DEG10130071; DEG10290116;
/gene_family="552" /family_size="39"	1	DEG10020009;
/gene_family="1063" /family_size="39"	1	DEG10080021;
/gene_family="493" /family_size="39"	4	DEG10220300; DEG10300064; DEG10340277; DEG10050107;
/gene_family="1673" /family_size="39"	26	DEG10170008; DEG10330337; DEG10010264; DEG10050567; DEG10230028; DEG10190283; DEG10020007;DEG10130289; DEG10290335; DEG10120221; DEG10180580; DEG10030066; DEG10060076; DEG10270016;DEG10340304; DEG10210214; DEG10140196; DEG10220277; DEG10240260; DEG10160333; DEG10280467;DEG10200206; DEG10250016; DEG10100006; DEG10320337; DEG10070109;
/gene_family="1275" /family_size="39"	1	DEG10280429;
/gene_family="1149" /family_size="39"	100	DEG10030734; DEG10340077; DEG10330114; DEG10330295; DEG10100381; DEG10100446; DEG10050542;DEG10220139; DEG10270222; DEG10250225; DEG10130324; DEG10120209; DEG10150123; DEG10180246;DEG10300009; DEG10180475; DEG10050394; DEG10050060; DEG10320118; DEG10020078; DEG10170084;DEG10290200; DEG10060049; DEG10250613; DEG10270176; DEG10250467; DEG10200045; DEG10140106;DEG10320297; DEG10190094; DEG10200440; …
/gene_family="723" /family_size="39"	1	DEG10080194;
/gene_family="786" /family_size="41"	24	DEG10220278; DEG10340111; DEG10050295; DEG10060236; DEG10160188; DEG10290291; DEG10200338;DEG10030105; DEG10010189; DEG10110153; DEG10170223; DEG10270472; DEG10100415; DEG10230270;DEG10130175; DEG10320224; DEG10140212; DEG10250501; DEG10330190; DEG10210070; DEG10310060;DEG10180418; DEG10020178; DEG10120181;
/gene_family="816" /family_size="39"	23	DEG10100543; DEG10120350; DEG10100520; DEG10210084; DEG10220246; DEG10250671; DEG10320250;DEG10330228; DEG10160225; DEG10200026; DEG10110172; DEG10170303; DEG10240298; DEG10050536;DEG10010066; DEG10250646; DEG10070081; DEG10270603; DEG10270582; DEG10280017; DEG10290111;DEG10240165; DEG10130474;
/gene_family="96" /family_size="39"	10	DEG10250071; DEG10100044; DEG10050311; DEG10110149; DEG10020040; DEG10250696; DEG10100561;DEG10020291; DEG10020082; DEG10270630;
/gene_family="349" /family_size="39"	2	DEG10180160; DEG10290193;
/gene_family="1486" /family_size="39"	21	DEG10190258; DEG10240349; DEG10200106; DEG10330276; DEG10220286; DEG10080290; DEG10230024;DEG10100613; DEG10110202; DEG10270687; DEG10170293; DEG10310124; DEG10120008; DEG10050355;DEG10030001; DEG10340307; DEG10320311; DEG10160272; DEG10070108; DEG10290001; DEG10250770;
/gene_family="1252" /family_size="39"	34	DEG10330155; DEG10080098; DEG10130459; DEG10240104; DEG10310081; DEG10050014; DEG10030196;DEG10220116; DEG10210169; DEG10240391; DEG10320012; DEG10200351; DEG10180015; DEG10270380;DEG10290100; DEG10250413; DEG10170126; DEG10340065; DEG10290370; DEG10160152; DEG10010101;DEG10120151; DEG10330012; DEG10160011; DEG10230212; DEG10180109; DEG10320068; DEG10110005;DEG10190008; DEG10070129; DEG10190062; …
/gene_family="1426" /family_size="39"	22	DEG10310003; DEG10120080; DEG10340306; DEG10230025; DEG10050392; DEG10290298; DEG10270325;DEG10220287; DEG10110159; DEG10180426; DEG10240219; DEG10250358; DEG10170300; DEG10130247;DEG10150107; DEG10010258; DEG10320228; DEG10100294; DEG10160194; DEG10190166; DEG10140257;DEG10330197;
/gene_family="1543" /family_size="39"	1	DEG10050456;
/gene_family="675" /family_size="39"	1	DEG10080302;
/gene_family="117" /family_size="39"	1	DEG10080265;
/gene_family="228" /family_size="39"	2	DEG10080316; DEG10340262;
/gene_family="992" /family_size="39"	26	DEG10290267; DEG10340394; DEG10170001; DEG10270001; DEG10050351; DEG10060380; DEG10280001;DEG10120001; DEG10200005; DEG10180542; DEG10020001; DEG10320309; DEG10250001; DEG10210001;DEG10140001; DEG10290004; DEG10030003; DEG10240351; DEG10150001; DEG10230112; DEG10160275;DEG10010001; DEG10220001; DEG10330279; DEG10100001; DEG10190255;
/gene_family="275" /family_size="39"	1	DEG10080313;
/gene_family="915" /family_size="39"	18	DEG10200385; DEG10330266; DEG10030046; DEG10050240; DEG10270112; DEG10120340; DEG10240346;DEG10230159; DEG10340490; DEG10290021; DEG10250122; DEG10280259; DEG10130047; DEG10190275;DEG10160263; DEG10310052; DEG10080222; DEG10220333;
/gene_family="336" /family_size="39"	5	DEG10310109; DEG10150317; DEG10130322; DEG10080275; DEG10050600;
/gene_family="1282" /family_size="39"	1	DEG10080097;
/gene_family="165" /family_size="39"	27	DEG10240322; DEG10170317; DEG10180494; DEG10130415; DEG10230147; DEG10020261; DEG10250144;DEG10220404; DEG10340464; DEG10210024; DEG10270132; DEG10320272; DEG10140224; DEG10100119;DEG10280166; DEG10060139; DEG10330321; DEG10010052; DEG10290049; DEG10050282; DEG10120070;DEG10030520; DEG10110183; DEG10080254; DEG10160317; DEG10200152; DEG10190212;
/gene_family="45" /family_size="39"	6	DEG10080299; DEG10130142; DEG10240140; DEG10200478; DEG10280296; DEG10150027;
/gene_family="1078" /family_size="39"	2	DEG10050025; DEG10110108;
/gene_family="329" /family_size="39"	26	DEG10130432; DEG10060122; DEG10220420; DEG10280183; DEG10010035; DEG10160300; DEG10190229;DEG10340481; DEG10310224; DEG10180506; DEG10210010; DEG10140241; DEG10330304; DEG10240336;DEG10120053; DEG10230153; DEG10110189; DEG10030537; DEG10200135; DEG10270124; DEG10020278;DEG10320289; DEG10290032; DEG10100103; DEG10250135; DEG10170334;
/gene_family="1027" /family_size="39"	16	DEG10220017; DEG10210185; DEG10120296; DEG10230248; DEG10340441; DEG10290260; DEG10030393;DEG10330121; DEG10050075; DEG10180178; DEG10320111; DEG10280388; DEG10200173; DEG10240198;DEG10160119; DEG10170098;
/gene_family="217" /family_size="78"	1	DEG10020283;
/gene_family="25" /family_size="39"	34	DEG10030559; DEG10200418; DEG10310006; DEG10060328; DEG10150334; DEG10200416; DEG10080206;DEG10120357; DEG10120359; DEG10210080; DEG10130026; DEG10290397; DEG10290395; DEG10130028;DEG10250245; DEG10140165; DEG10280104; DEG10280102; DEG10250243; DEG10100207; DEG10240356;DEG10100205; DEG10240358; DEG10060330; DEG10270239; DEG10030561; DEG10070182; DEG10270237;DEG10070184; DEG10140095; DEG10140097; …
/gene_family="497" /family_size="39"	11	DEG10170175; DEG10070148; DEG10140110; DEG10210124; DEG10060209; DEG10020148; DEG10050110;DEG10240053; DEG10120248; DEG10200332; DEG10010147;
/gene_family="863" /family_size="39"	1	DEG10080101;
/gene_family="1645" /family_size="39"	22	DEG10290361; DEG10030476; DEG10340058; DEG10150249; DEG10310087; DEG10280450; DEG10230204;DEG10190017; DEG10160020; DEG10110012; DEG10020109; DEG10330021; DEG10240114; DEG10050412;DEG10120031; DEG10010108; DEG10200340; DEG10180023; DEG10070205; DEG10130479; DEG10320021;DEG10170130;
/gene_family="948" /family_size="50"	3	DEG10170247; DEG10110119; DEG10080173;
/gene_family="1784" /family_size="39"	9	DEG10130022; DEG10060334; DEG10120362; DEG10030565; DEG10200062; DEG10140101; DEG10250240;DEG10210075; DEG10270234;
/gene_family="1028" /family_size="39"	11	DEG10340390; DEG10230109; DEG10130185; DEG10200018; DEG10030545; DEG10050194; DEG10010161;DEG10220239; DEG10290014; DEG10280215; DEG10190244;
/gene_family="1706" /family_size="39"	1	DEG10080076;
/gene_family="942" /family_size="39"	20	DEG10290304; DEG10340387; DEG10220132; DEG10190003; DEG10150268; DEG10330005; DEG10250208;DEG10310114; DEG10230107; DEG10130450; DEG10050358; DEG10030149; DEG10320007; DEG10280274;DEG10270197; DEG10010177; DEG10160005; DEG10200408; DEG10120094; DEG10180008;
/gene_family="1342" /family_size="39"	2	DEG10180072; DEG10130377;
/gene_family="1271" /family_size="39"	5	DEG10270300; DEG10200363; DEG10250320; DEG10280516; DEG10130010;
/gene_family="713" /family_size="39"	2	DEG10130166; DEG10260014;
/gene_family="609" /family_size="39"	14	DEG10060176; DEG10050080; DEG10050199; DEG10340089; DEG10080162; DEG10260015; DEG10050020;DEG10080123; DEG10050140; DEG10250308; DEG10180402; DEG10270289; DEG10180012; DEG10140111;
/gene_family="585" /family_size="39"	22	DEG10130433; DEG10030538; DEG10060121; DEG10150035; DEG10220421; DEG10010034; DEG10080263;DEG10340482; DEG10180507; DEG10330303; DEG10210009; DEG10140242; DEG10240337; DEG10120052;DEG10280184; DEG10160299; DEG10200134; DEG10190230; DEG10020279; DEG10100102; DEG10320290;DEG10290031;
/gene_family="670" /family_size="39"	24	DEG10190183; DEG10030134; DEG10010136; DEG10080305; DEG10220059; DEG10330226; DEG10160223;DEG10110171; DEG10070137; DEG10250550; DEG10170163; DEG10340048; DEG10270507; DEG10240294;DEG10060112; DEG10100450; DEG10120366; DEG10200010; DEG10230194; DEG10020136; DEG10140070;DEG10290113; DEG10310049; DEG10130058;
/gene_family="1528" /family_size="39"	1	DEG10220228;
/gene_family="1336" /family_size="39"	12	DEG10150280; DEG10250099; DEG10100064; DEG10160088; DEG10120326; DEG10190104; DEG10130354;DEG10320162; DEG10270090; DEG10330090; DEG10290327; DEG10240307;
/gene_family="415" /family_size="39"	18	DEG10160171; DEG10130097; DEG10190048; DEG10270477; DEG10050106; DEG10120245; DEG10250508;DEG10170232; DEG10150077; DEG10140255; DEG10220367; DEG10240149; DEG10320052; DEG10180074;DEG10110030; DEG10330174; DEG10280197; DEG10200291;
/gene_family="1061" /family_size="39"	2	DEG10080233; DEG10310061;
/gene_family="898" /family_size="39"	18	DEG10100067; DEG10250313; DEG10130133; DEG10130169; DEG10190024; DEG10250103; DEG10180034;DEG10330030; DEG10160029; DEG10280191; DEG10280148; DEG10020011; DEG10250347; DEG10100283;DEG10120184; DEG10270094; DEG10290122; DEG10240171;
/gene_family="229" /family_size="39"	13	DEG10250631; DEG10050245; DEG10300046; DEG10030139; DEG10270219; DEG10070145; DEG10060345;DEG10260063; DEG10270573; DEG10050321; DEG10060249; DEG10020228; DEG10030572;
/gene_family="880" /family_size="39"	1	DEG10080049;
/gene_family="131" /family_size="39"	18	DEG10220138; DEG10030711; DEG10180344; DEG10190130; DEG10320185; DEG10230265; DEG10130298;DEG10330080; DEG10070127; DEG10160077; DEG10290375; DEG10280087; DEG10210036; DEG10340407;DEG10080156; DEG10270635; DEG10100568; DEG10250703;
/gene_family="1457" /family_size="39"	1	DEG10050009;
/gene_family="1439" /family_size="39"	1	DEG10050328;
/gene_family="1391" /family_size="39"	26	DEG10120232; DEG10340017; DEG10160102; DEG10310168; DEG10140182; DEG10020205; DEG10060368;DEG10280202; DEG10180273; DEG10230185; DEG10270322; DEG10130004; DEG10200237; DEG10070234;DEG10250355; DEG10030129; DEG10290124; DEG10170260; DEG10010216; DEG10330105; DEG10050579;DEG10320142; DEG10220064; DEG10100291; DEG10210031; DEG10190114;
/gene_family="120" /family_size="39"	1	DEG10080142;
/gene_family="926" /family_size="41"	1	DEG10080087;
/gene_family="1445" /family_size="39"	14	DEG10100274; DEG10340018; DEG10290388; DEG10270313; DEG10330273; DEG10300115; DEG10160269;DEG10060219; DEG10250338; DEG10140287; DEG10020195; DEG10130376; DEG10110207; DEG10210008;
/gene_family="765" /family_size="39"	19	DEG10290160; DEG10340130; DEG10120313; DEG10190038; DEG10240244; DEG10050386; DEG10320042;DEG10160043; DEG10280068; DEG10220444; DEG10150101; DEG10210178; DEG10200253; DEG10170294;DEG10330044; DEG10030439; DEG10180047; DEG10130203; DEG10070023;
/gene_family="1174" /family_size="39"	7	DEG10080053; DEG10270644; DEG10180348; DEG10180255; DEG10070104; DEG10140105; DEG10180213;
/gene_family="579" /family_size="39"	2	DEG10110061; DEG10050085;
/gene_family="914" /family_size="39"	14	DEG10130118; DEG10180354; DEG10200036; DEG10240127; DEG10050608; DEG10190134; DEG10330075;DEG10010145; DEG10120231; DEG10030256; DEG10290231; DEG10310022; DEG10150229; DEG10160072;
/gene_family="745" /family_size="69"	1	DEG10050458;
/gene_family="189" /family_size="39"	1	DEG10080040;
/gene_family="438" /family_size="47"	1	DEG10080147;
/gene_family="588" /family_size="39"	2	DEG10300088; DEG10310083;
/gene_family="383" /family_size="39"	9	DEG10250391; DEG10280445; DEG10100313; DEG10050087; DEG10200297; DEG10270365; DEG10260094;DEG10080188; DEG10130216;
/gene_family="61" /family_size="39"	1	DEG10080309;
/gene_family="200" /family_size="39"	3	DEG10200274; DEG10240096; DEG10280333;
/gene_family="1468" /family_size="39"	25	DEG10240326; DEG10150044; DEG10120065; DEG10050277; DEG10230149; DEG10020266; DEG10210020;DEG10340469; DEG10290044; DEG10100115; DEG10320277; DEG10200147; DEG10140229; DEG10130420;DEG10170322; DEG10060134; DEG10010047; DEG10110185; DEG10030525; DEG10080256; DEG10160312;DEG10190217; DEG10280171; DEG10220409; DEG10330316;
/gene_family="411" /family_size="39"	1	DEG10080187;
/gene_family="682" /family_size="39"	2	DEG10030096; DEG10300013;
/gene_family="261" /family_size="39"	4	DEG10180608; DEG10050036; DEG10020032; DEG10120173;
/gene_family="589" /family_size="39"	3	DEG10300060; DEG10160040; DEG10330041;
/gene_family="1451" /family_size="39"	29	DEG10290172; DEG10250398; DEG10310105; DEG10100319; DEG10180099; DEG10060213; DEG10050034;DEG10150190; DEG10140062; DEG10270372; DEG10020042; DEG10220386; DEG10330162; DEG10190058;DEG10170038; DEG10160159; DEG10120089; DEG10100557; DEG10210190; DEG10340027; DEG10010022;DEG10270624; DEG10320062; DEG10230191; DEG10240223; DEG10200072; DEG10280034; DEG10250689;DEG10130212;
/gene_family="821" /family_size="39"	1	DEG10080182;
/gene_family="1208" /family_size="39"	12	DEG10160174; DEG10250102; DEG10190046; DEG10320050; DEG10270093; DEG10280124; DEG10200167;DEG10180069; DEG10020187; DEG10330177; DEG10120143; DEG10130153;
/gene_family="1505" /family_size="39"	1	DEG10050264;
/gene_family="402" /family_size="39"	1	DEG10080209;
/gene_family="1003" /family_size="39"	50	DEG10230049; DEG10210115; DEG10170147; DEG10240026; DEG10330294; DEG10280268; DEG10060239;DEG10070070; DEG10110193; DEG10200459; DEG10280321; DEG10080130; DEG10020123; DEG10160183;DEG10340351; DEG10020124; DEG10230083; DEG10240125; DEG10210140; DEG10180523; DEG10180407;DEG10320298; DEG10190240; DEG10120191; DEG10140264; DEG10130268; DEG10270524; DEG10170146;DEG10330185; DEG10340288; DEG10120343; …
/gene_family="724" /family_size="40"	1	DEG10140287;
/gene_family="1056" /family_size="39"	9	DEG10280304; DEG10080050; DEG10100192; DEG10250231; DEG10280503; DEG10270226; DEG10340035;DEG10130332; DEG10200058;
/gene_family="1842" /family_size="39"	1	DEG10080201;
/gene_family="1058" /family_size="39"	1	DEG10080034;
/gene_family="852" /family_size="39"	11	DEG10160100; DEG10330102; DEG10130035; DEG10320140; DEG10230067; DEG10150058; DEG10050581;DEG10240169; DEG10190115; DEG10180277; DEG10220153;
/gene_family="583" /family_size="39"	9	DEG10080099; DEG10250011; DEG10280146; DEG10280418; DEG10130134; DEG10030688; DEG10270012;DEG10280438; DEG10200168;
/gene_family="1203" /family_size="39"	53	DEG10230041; DEG10290198; DEG10160082; DEG10230108; DEG10120021; DEG10270474; DEG10160197;DEG10150090; DEG10290095; DEG10060025; DEG10100563; DEG10010153; DEG10060109; DEG10060092;DEG10220240; DEG10020181; DEG10270631; DEG10140128; DEG10140304; DEG10070078; DEG10320174;DEG10320231; DEG10330084; DEG10330200; DEG10240217; DEG10250697; DEG10180315; DEG10030140;DEG10110114; DEG10130100; DEG10030238; …
/gene_family="325" /family_size="39"	5	DEG10120355; DEG10150244; DEG10130191; DEG10250756; DEG10270675;
/gene_family="693" /family_size="39"	2	DEG10310119; DEG10080090;
/gene_family="1800" /family_size="39"	3	DEG10160147; DEG10330150; DEG10320073;
/gene_family="532" /family_size="39"	2	DEG10290266; DEG10180435;
/gene_family="581" /family_size="39"	2	DEG10180159; DEG10290194;
/gene_family="995" /family_size="39"	11	DEG10330271; DEG10240354; DEG10150311; DEG10230163; DEG10180563; DEG10320322; DEG10020115;DEG10010112; DEG10290352; DEG10170136; DEG10160267;
/gene_family="1102" /family_size="39"	3	DEG10120013; DEG10050573; DEG10230318;
/gene_family="1601" /family_size="39"	2	DEG10200065; DEG10080011;
/gene_family="346" /family_size="39"	20	DEG10240378; DEG10190136; DEG10030210; DEG10160069; DEG10120081; DEG10330071; DEG10220086;DEG10320190; DEG10200435; DEG10010213; DEG10130104; DEG10050453; DEG10270587; DEG10150121;DEG10020199; DEG10280283; DEG10070025; DEG10170255; DEG10210176; DEG10250654;
/gene_family="976" /family_size="39"	22	DEG10270168; DEG10250172; DEG10270571; DEG10260092; DEG10050427; DEG10340299; DEG10140302;DEG10130149; DEG10180549; DEG10290379; DEG10010080; DEG10020219; DEG10110204; DEG10100513;DEG10100512; DEG10160254; DEG10050208; DEG10250627; DEG10330257; DEG10080294; DEG10170278;DEG10100141;
/gene_family="46" /family_size="39"	3	DEG10050059; DEG10220217; DEG10110218;
/gene_family="69" /family_size="39"	1	DEG10080269;
/gene_family="230" /family_size="39"	18	DEG10050637; DEG10220274; DEG10130398; DEG10320154; DEG10180225; DEG10200465; DEG10240226;DEG10230239; DEG10190110; DEG10330106; DEG10120274; DEG10020085; DEG10160104; DEG10170104;DEG10110097; DEG10280522; DEG10340452; DEG10250293;
/gene_family="1196" /family_size="39"	2	DEG10080285; DEG10080266;
/gene_family="1480" /family_size="39"	2	DEG10050339; DEG10110065;
/gene_family="714" /family_size="78"	1	DEG10050615;
/gene_family="1417" /family_size="39"	8	DEG10320076; DEG10330146; DEG10050088; DEG10290218; DEG10160143; DEG10080215; DEG10190069;DEG10030402;
/gene_family="216" /family_size="39"	25	DEG10170214; DEG10290207; DEG10220194; DEG10290096; DEG10240157; DEG10160001; DEG10210188;DEG10200006; DEG10270062; DEG10080013; DEG10180385; DEG10240216; DEG10130207; DEG10100038;DEG10280144; DEG10330001; DEG10250060; DEG10060246; DEG10230317; DEG10140074; DEG10050129;DEG10110001; DEG10020173; DEG10320001; DEG10180002;
/gene_family="768" /family_size="39"	24	DEG10290051; DEG10170315; DEG10240320; DEG10130413; DEG10010054; DEG10180493; DEG10060140;DEG10030518; DEG10230146; DEG10340462; DEG10220402; DEG10320270; DEG10140223; DEG10280164;DEG10330323; DEG10150049; DEG10120072; DEG10050284; DEG10110181; DEG10160319; DEG10080253;DEG10020259; DEG10200153; DEG10190210;
/gene_family="24" /family_size="39"	1	DEG10240071;
/gene_family="1671" /family_size="39"	25	DEG10190185; DEG10170235; DEG10240122; DEG10210085; DEG10020183; DEG10200048; DEG10160228;DEG10220166; DEG10250476; DEG10110174; DEG10280434; DEG10070058; DEG10060316; DEG10270446;DEG10290318; DEG10130308; DEG10020018; DEG10180201; DEG10180473; DEG10100391; DEG10140057;DEG10330231; DEG10070001; DEG10010194; DEG10140136;
/gene_family="1043" /family_size="39"	1	DEG10080105;
/gene_family="1189" /family_size="39"	26	DEG10330310; DEG10030531; DEG10150038; DEG10060128; DEG10050271; DEG10080260; DEG10160306;DEG10190223; DEG10200141; DEG10130426; DEG10240331; DEG10120059; DEG10010041; DEG10170328;DEG10230150; DEG10250139; DEG10270127; DEG10340475; DEG10020272; DEG10220414; DEG10140235;DEG10210016; DEG10280177; DEG10320283; DEG10290038; DEG10100109;
/gene_family="1327" /family_size="39"	2	DEG10080314; DEG10310148;
/gene_family="836" /family_size="39"	4	DEG10060271; DEG10290233; DEG10180313; DEG10250512;
/gene_family="137" /family_size="39"	6	DEG10140195; DEG10340195; DEG10220068; DEG10110045; DEG10060118; DEG10180408;
/gene_family="128" /family_size="39"	2	DEG10220038; DEG10340281;
/gene_family="496" /family_size="39"	10	DEG10230056; DEG10270466; DEG10190089; DEG10120298; DEG10150072; DEG10030391; DEG10180180;DEG10290259; DEG10070020; DEG10250492;
/gene_family="303" /family_size="39"	1	DEG10050301;
/gene_family="857" /family_size="39"	3	DEG10080322; DEG10150265; DEG10050013;
/gene_family="1110" /family_size="39"	10	DEG10270454; DEG10250484; DEG10270453; DEG10100398; DEG10250483; DEG10050238; DEG10280090;DEG10200285; DEG10310021; DEG10170075;
/gene_family="342" /family_size="39"	1	DEG10080200;
/gene_family="105" /family_size="39"	1	DEG10080271;
/gene_family="1725" /family_size="39"	38	DEG10330156; DEG10200190; DEG10240005; DEG10330017; DEG10030195; DEG10240109; DEG10270377;DEG10010260; DEG10290099; DEG10340445; DEG10190013; DEG10280456; DEG10290365; DEG10230246;DEG10230208; DEG10130041; DEG10070057; DEG10320017; DEG10100326; DEG10180018; DEG10030480;DEG10170115; DEG10160153; DEG10220186; DEG10150252; DEG10160016; DEG10310172; DEG10180108;DEG10320067; DEG10110008; DEG10220120; …
/gene_family="215" /family_size="39"	1	DEG10050341;
/gene_family="428" /family_size="46"	2	DEG10020055; DEG10050086;
/gene_family="1453" /family_size="39"	1	DEG10050639;
/gene_family="1243" /family_size="39"	19	DEG10270225; DEG10170056; DEG10230168; DEG10220065; DEG10130019; DEG10140084; DEG10240020;DEG10180318; DEG10060311; DEG10250230; DEG10340516; DEG10280448; DEG10100191; DEG10190126;DEG10010259; DEG10210210; DEG10020056; DEG10120144; DEG10290353;
/gene_family="705" /family_size="39"	1	DEG10310183;
/gene_family="267" /family_size="39"	3	DEG10060059; DEG10250714; DEG10140154;
/gene_family="1506" /family_size="39"	14	DEG10100609; DEG10060083; DEG10010230; DEG10130147; DEG10200359; DEG10220259; DEG10270683;DEG10240172; DEG10140281; DEG10010241; DEG10170073; DEG10250766; DEG10070179; DEG10210167;
/gene_family="208" /family_size="39"	28	DEG10030229; DEG10220348; DEG10330138; DEG10100605; DEG10170006; DEG10200296; DEG10270673;DEG10250754; DEG10020005; DEG10190075; DEG10230295; DEG10240174; DEG10280108; DEG10290216;DEG10150149; DEG10320091; DEG10310039; DEG10130362; DEG10340140; DEG10160136; DEG10060004;DEG10010006; DEG10120157; DEG10080295; DEG10180145; DEG10070134; DEG10140016; DEG10210174;
/gene_family="1238" /family_size="39"	4	DEG10110035; DEG10260003; DEG10240285; DEG10300033;
/gene_family="108" /family_size="39"	26	DEG10100160; DEG10170009; DEG10340401; DEG10010263; DEG10310158; DEG10030155; DEG10300096;DEG10250167; DEG10250148; DEG10270578; DEG10280043; DEG10210141; DEG10200371; DEG10130462;DEG10230052; DEG10050626; DEG10230116; DEG10250641; DEG10280376; DEG10270162; DEG10340267;DEG10070064; DEG10260070; DEG10200364; DEG10180164; DEG10030698;
/gene_family="560" /family_size="39"	2	DEG10300031; DEG10310086;
/gene_family="13" /family_size="40"	14	DEG10100378; DEG10100265; DEG10100150; DEG10250185; DEG10130114; DEG10110107; DEG10270181;DEG10280233; DEG10280391; DEG10130045; DEG10050115; DEG10250328; DEG10250463; DEG10270305;
/gene_family="97" /family_size="39"	15	DEG10030053; DEG10270485; DEG10330260; DEG10240355; DEG10150309; DEG10200480; DEG10180574;DEG10290069; DEG10130299; DEG10280295; DEG10160257; DEG10250521; DEG10120367; DEG10110214;DEG10320333;
/gene_family="1359" /family_size="39"	23	DEG10170214; DEG10240007; DEG10150262; DEG10210188; DEG10080013; DEG10160241; DEG10020173;DEG10330244; DEG10340449; DEG10200186; DEG10190198; DEG10290351; DEG10240114; DEG10180486;DEG10060246; DEG10220183; DEG10120031; DEG10140074; DEG10230243; DEG10010198; DEG10030073;DEG10310027; DEG10280075;
/gene_family="742" /family_size="39"	2	DEG10180345; DEG10180347;
/gene_family="1572" /family_size="39"	1	DEG10080103;
/gene_family="833" /family_size="39"	7	DEG10330074; DEG10280334; DEG10310200; DEG10240097; DEG10120371; DEG10080246; DEG10200273;
/gene_family="1130" /family_size="39"	2	DEG10030493; DEG10010071;
/gene_family="204" /family_size="39"	16	DEG10330132; DEG10290239; DEG10030360; DEG10340268; DEG10160130; DEG10320099; DEG10200365;DEG10130275; DEG10150127; DEG10230033; DEG10110058; DEG10190079; DEG10220376; DEG10180150;DEG10240057; DEG10050026;
/gene_family="1147" /family_size="39"	100	DEG10030734; DEG10100216; DEG10320118; DEG10340077; DEG10330114; DEG10330295; DEG10100381;DEG10050394; DEG10050464; DEG10020083; DEG10050542; DEG10270222; DEG10080054; DEG10130324;DEG10150123; DEG10180246; DEG10300009; DEG10050262; DEG10260086; DEG10180475; DEG10100446;DEG10050060; DEG10190094; DEG10030320; DEG10290200; DEG10060049; DEG10250613; DEG10270176;DEG10200045; DEG10320297; DEG10070110; …
/gene_family="365" /family_size="39"	26	DEG10270340; DEG10030473; DEG10270575; DEG10150247; DEG10120164; DEG10230302; DEG10160023;DEG10250638; DEG10200375; DEG10130107; DEG10170070; DEG10140027; DEG10020064; DEG10060054;DEG10330024; DEG10290357; DEG10240117; DEG10100514; DEG10010243; DEG10250368; DEG10220292;DEG10190021; DEG10180026; DEG10020297; DEG10320024; DEG10210052;
/gene_family="188" /family_size="39"	78	DEG10030734; DEG10030366; DEG10150123; DEG10050616; DEG10340077; DEG10330114; DEG10250180;DEG10330295; DEG10180114; DEG10100446; DEG10330160; DEG10270434; DEG10060029; DEG10050540;DEG10250613; DEG10050542; DEG10230224; DEG10050424; DEG10070090; DEG10220139; DEG10050262;DEG10220079; DEG10140305; DEG10270222; DEG10050557; DEG10250225; DEG10140145; DEG10100381;DEG10180522; DEG10070144; DEG10020286; …
/gene_family="1634" /family_size="39"	19	DEG10210204; DEG10340382; DEG10260030; DEG10280303; DEG10250183; DEG10230104; DEG10080104;DEG10150320; DEG10270179; DEG10310197; DEG10100148; DEG10060367; DEG10180334; DEG10250055;DEG10200451; DEG10180210; DEG10220102; DEG10270057; DEG10100033;
/gene_family="697" /family_size="39"	2	DEG10080321; DEG10290345;
/gene_family="177" /family_size="41"	1	DEG10050009;
/gene_family="504" /family_size="39"	28	DEG10230046; DEG10030205; DEG10100488; DEG10290269; DEG10250593; DEG10200184; DEG10050398;DEG10060214; DEG10110138; DEG10140149; DEG10160066; DEG10220280; DEG10190139; DEG10240233;DEG10280518; DEG10330067; DEG10010081; DEG10120301; DEG10340285; DEG10320193; DEG10020218;DEG10150213; DEG10180367; DEG10140148; DEG10130131; DEG10070167; DEG10210131; DEG10170277;
/gene_family="940" /family_size="39"	1	DEG10080059;
/gene_family="382" /family_size="39"	100	DEG10030734; DEG10320118; DEG10340077; DEG10330114; DEG10060061; DEG10060062; DEG10180114;DEG10300009; DEG10020083; DEG10270222; DEG10250225; DEG10080054; DEG10130324; DEG10300045;DEG10330295; DEG10150123; DEG10180246; DEG10280312; DEG10050262; DEG10260086; DEG10050394;DEG10050060; DEG10190094; DEG10330135; DEG10290200; DEG10060049; DEG10250613; DEG10270176;DEG10210103; DEG10230224; DEG10140106; …
/gene_family="1255" /family_size="39"	22	DEG10100276; DEG10150266; DEG10340171; DEG10220306; DEG10320025; DEG10160024; DEG10200002;DEG10210144; DEG10070053; DEG10250340; DEG10240118; DEG10290066; DEG10030488; DEG10010210;DEG10330025; DEG10080143; DEG10230316; DEG10270314; DEG10180027; DEG10170251; DEG10280293;DEG10130055;
/gene_family="255" /family_size="39"	22	DEG10120215; DEG10130353; DEG10240367; DEG10100370; DEG10010179; DEG10210086; DEG10060211;DEG10230266; DEG10320247; DEG10170208; DEG10140167; DEG10200373; DEG10250453; DEG10050169;DEG10270420; DEG10220377; DEG10180456; DEG10160216; DEG10020170; DEG10070161; DEG10290119;DEG10330219;
/gene_family="1100" /family_size="39"	11	DEG10230131; DEG10330213; DEG10220129; DEG10270257; DEG10180454; DEG10190176; DEG10100229;DEG10250270; DEG10160210; DEG10320243; DEG10120019;
/gene_family="1022" /family_size="39"	21	DEG10150020; DEG10130190; DEG10060033; DEG10230050; DEG10200019; DEG10160214; DEG10140035;DEG10120333; DEG10340291; DEG10240366; DEG10020226; DEG10010075; DEG10190178; DEG10320246;DEG10330217; DEG10170287; DEG10030101; DEG10220072; DEG10290120; DEG10070006; DEG10070118;
/gene_family="33" /family_size="39"	1	DEG10120293;
/gene_family="870" /family_size="39"	12	DEG10270597; DEG10020024; DEG10170020; DEG10240249; DEG10130018; DEG10080069; DEG10220125;DEG10280158; DEG10050104; DEG10250666; DEG10120208; DEG10100534;
/gene_family="950" /family_size="39"	6	DEG10030432; DEG10230018; DEG10160175; DEG10150257; DEG10330178; DEG10120015;
/gene_family="82" /family_size="39"	4	DEG10100461; DEG10250563; DEG10050403; DEG10270521;
/gene_family="694" /family_size="39"	11	DEG10330271; DEG10250577; DEG10050452; DEG10180563; DEG10320322; DEG10020115; DEG10010112;DEG10080307; DEG10170136; DEG10260084; DEG10160267;
/gene_family="601" /family_size="39"	24	DEG10170324; DEG10240328; DEG10020268; DEG10120063; DEG10050275; DEG10180500; DEG10100113;DEG10200145; DEG10320279; DEG10130422; DEG10290042; DEG10150042; DEG10060132; DEG10010045;DEG10160310; DEG10030527; DEG10340471; DEG10220411; DEG10080258; DEG10280173; DEG10140231;DEG10330314; DEG10210019; DEG10190219;
/gene_family="286" /family_size="39"	5	DEG10130350; DEG10220038; DEG10240075; DEG10200033; DEG10340281;
/gene_family="1249" /family_size="39"	2	DEG10250725; DEG10250125;
/gene_family="664" /family_size="46"	9	DEG10050366; DEG10020013; DEG10250180; DEG10060049; DEG10270434; DEG10100381; DEG10250467;DEG10050542; DEG10270176;
/gene_family="642" /family_size="39"	14	DEG10140068; DEG10060080; DEG10100487; DEG10010083; DEG10240009; DEG10280092; DEG10250592;DEG10130126; DEG10020217; DEG10200331; DEG10170275; DEG10120383; DEG10210056; DEG10270545;
/gene_family="127" /family_size="39"	6	DEG10280331; DEG10240093; DEG10270566; DEG10120375; DEG10200277; DEG10080244;
/gene_family="866" /family_size="39"	24	DEG10130095; DEG10270475; DEG10060024; DEG10080218; DEG10020182; DEG10340359; DEG10240276;DEG10160060; DEG10140129; DEG10320199; DEG10330061; DEG10170228; DEG10190144; DEG10200424;DEG10120363; DEG10210212; DEG10220456; DEG10100416; DEG10230092; DEG10250504; DEG10180381;DEG10290282; DEG10010193; DEG10110144;
/gene_family="628" /family_size="39"	5	DEG10240046; DEG10030190; DEG10050160; DEG10080150; DEG10200447;
/gene_family="820" /family_size="39"	5	DEG10300026; DEG10070007; DEG10220179; DEG10030355; DEG10170234;
/gene_family="245" /family_size="39"	24	DEG10130434; DEG10060274; DEG10150332; DEG10120239; DEG10160268; DEG10050404; DEG10140082;DEG10220346; DEG10200105; DEG10180560; DEG10340255; DEG10320321; DEG10170242; DEG10310079;DEG10190269; DEG10240311; DEG10080319; DEG10010200; DEG10070082; DEG10330272; DEG10210111;DEG10290387; DEG10280396; DEG10030014;
/gene_family="88" /family_size="39"	1	DEG10080135;
/gene_family="266" /family_size="39"	2	DEG10270653; DEG10250728;
/gene_family="1154" /family_size="39"	1	DEG10310181;
/gene_family="621" /family_size="39"	24	DEG10120236; DEG10240029; DEG10060045; DEG10160085; DEG10170027; DEG10250190; DEG10130356;DEG10010013; DEG10340271; DEG10220013; DEG10330087; DEG10210006; DEG10290330; DEG10100154;DEG10230034; DEG10050578; DEG10270187; DEG10180204; DEG10080122; DEG10190101; DEG10020034;DEG10320165; DEG10200079; DEG10140039;
/gene_family="295" /family_size="39"	3	DEG10020292; DEG10080136; DEG10260074;
/gene_family="1392" /family_size="39"	17	DEG10170215; DEG10340215; DEG10240156; DEG10080014; DEG10200028; DEG10030175; DEG10310100;DEG10160184; DEG10320218; DEG10130499; DEG10150290; DEG10330186; DEG10290143; DEG10190159;DEG10110152; DEG10180409; DEG10280145;
/gene_family="1576" /family_size="39"	8	DEG10260002; DEG10270536; DEG10250584; DEG10290068; DEG10310107; DEG10280512; DEG10050348;DEG10130078;
/gene_family="624" /family_size="39"	5	DEG10100339; DEG10280367; DEG10250424; DEG10050501; DEG10130296;
/gene_family="28" /family_size="39"	18	DEG10240154; DEG10120306; DEG10030174; DEG10100292; DEG10130261; DEG10280205; DEG10160185;DEG10230262; DEG10340416; DEG10250356; DEG10170103; DEG10330187; DEG10190160; DEG10220140;DEG10290142; DEG10310078; DEG10320219; DEG10180410;
/gene_family="445" /family_size="39"	6	DEG10130292; DEG10050320; DEG10270137; DEG10250149; DEG10100125; DEG10310164;
/gene_family="1316" /family_size="39"	27	DEG10340012; DEG10130250; DEG10120331; DEG10290091; DEG10080031; DEG10230184; DEG10320238;DEG10190171; DEG10160205; DEG10250264; DEG10330208; DEG10170266; DEG10220389; DEG10010219;DEG10240011; DEG10100226; DEG10030087; DEG10200012; DEG10060034; DEG10280374; DEG10020211;DEG10270253; DEG10180439; DEG10070146; DEG10210133; DEG10110166; DEG10140274;
/gene_family="1129" /family_size="39"	1	DEG10080064;
/gene_family="1408" /family_size="39"	2	DEG10280250; DEG10200100;
/gene_family="1677" /family_size="39"	83	DEG10130324; DEG10030734; DEG10130213; DEG10140075; DEG10030366; DEG10150123; DEG10270222;DEG10050616; DEG10340077; DEG10330114; DEG10290200; DEG10330295; DEG10180114; DEG10320118;DEG10270434; DEG10250613; DEG10060029; DEG10050542; DEG10230224; DEG10050425; DEG10050424;DEG10050262; DEG10220079; DEG10140305; DEG10070103; DEG10140146; DEG10050426; DEG10250225;DEG10140145; DEG10320256; DEG10100381; …
/gene_family="150" /family_size="39"	15	DEG10150056; DEG10220105; DEG10100550; DEG10050317; DEG10250680; DEG10270608; DEG10250021;DEG10250709; DEG10270638; DEG10260045; DEG10270027; DEG10100573; DEG10230103; DEG10100011;DEG10220229;
/gene_family="429" /family_size="39"	1	DEG10080072;
/gene_family="253" /family_size="39"	4	DEG10080285; DEG10120096; DEG10080266; DEG10030354;
/gene_family="194" /family_size="39"	30	DEG10020135; DEG10120128; DEG10230121; DEG10210088; DEG10010135; DEG10130253; DEG10060218;DEG10030435; DEG10330047; DEG10020201; DEG10140286; DEG10050250; DEG10160046; DEG10180051;DEG10240076; DEG10290164; DEG10010214; DEG10340106; DEG10280230; DEG10150104; DEG10220005;DEG10320045; DEG10190041; DEG10170162; DEG10250309; DEG10200264; DEG10170256; DEG10270290;DEG10100255; DEG10070048;
/gene_family="83" /family_size="39"	2	DEG10080078; DEG10070157;
/gene_family="763" /family_size="39"	11	DEG10170233; DEG10160083; DEG10250510; DEG10340021; DEG10330085; DEG10210007; DEG10070009;DEG10080186; DEG10110113; DEG10300027; DEG10220302;
/gene_family="1623" /family_size="39"	6	DEG10060053; DEG10080136; DEG10070188; DEG10020292; DEG10140053; DEG10260074;
/gene_family="1631" /family_size="39"	3	DEG10180597; DEG10190179; DEG10180167;
/gene_family="652" /family_size="39"	49	DEG10290306; DEG10240062; DEG10220095; DEG10310102; DEG10060273; DEG10010199; DEG10050502;DEG10010110; DEG10020186; DEG10160003; DEG10120108; DEG10230300; DEG10340272; DEG10150075;DEG10140090; DEG10310141; DEG10130006; DEG10280125; DEG10270449; DEG10270288; DEG10200161;DEG10170240; DEG10010218; DEG10140025; DEG10210162; DEG10250479; DEG10030147; DEG10210063;DEG10330003; DEG10060284; DEG10320005; …
/gene_family="998" /family_size="39"	22	DEG10330018; DEG10290364; DEG10030479; DEG10120272; DEG10050408; DEG10230207; DEG10190014;DEG10130483; DEG10320018; DEG10210061; DEG10180019; DEG10240110; DEG10170183; DEG10340061;DEG10010105; DEG10150251; DEG10160017; DEG10110009; DEG10220121; DEG10200345; DEG10070141;DEG10020154;
/gene_family="1598" /family_size="39"	1	DEG10310122;
/gene_family="1197" /family_size="39"	1	DEG10080022;
/gene_family="6" /family_size="39"	4	DEG10190151; DEG10230190; DEG10030495; DEG10180398;
/gene_family="1012" /family_size="39"	6	DEG10220289; DEG10340357; DEG10010076; DEG10280375; DEG10240162; DEG10200094;
/gene_family="728" /family_size="39"	21	DEG10020129; DEG10180221; DEG10050491; DEG10320157; DEG10010128; DEG10190108; DEG10270641;DEG10060097; DEG10130083; DEG10050215; DEG10070067; DEG10210116; DEG10140176; DEG10100575;DEG10240001; DEG10220157; DEG10200333; DEG10250713; DEG10290253; DEG10170154; DEG10110077;
/gene_family="172" /family_size="40"	2	DEG10180554; DEG10100295;
/gene_family="1287" /family_size="39"	6	DEG10030266; DEG10220041; DEG10340155; DEG10230304; DEG10260026; DEG10280038;
/gene_family="1113" /family_size="39"	7	DEG10080069; DEG10130295; DEG10280368; DEG10050500; DEG10250005; DEG10270006; DEG10050421;
/gene_family="1088" /family_size="39"	24	DEG10260038; DEG10120350; DEG10210084; DEG10220246; DEG10250671; DEG10320250; DEG10330228;DEG10160225; DEG10200026; DEG10110172; DEG10020288; DEG10170303; DEG10240298; DEG10050536;DEG10010066; DEG10060039; DEG10070081; DEG10270603; DEG10100543; DEG10280017; DEG10290111;DEG10110121; DEG10240165; DEG10130474;
/gene_family="243" /family_size="39"	23	DEG10210197; DEG10230289; DEG10100232; DEG10270261; DEG10050001; DEG10280266; DEG10220016;DEG10340137; DEG10320124; DEG10170077; DEG10160091; DEG10130309; DEG10060242; DEG10020194;DEG10250274; DEG10180303; DEG10190123; DEG10130176; DEG10140018; DEG10310185; DEG10330093;DEG10020070; DEG10070229;
/gene_family="1688" /family_size="39"	16	DEG10340092; DEG10330270; DEG10270244; DEG10130441; DEG10320323; DEG10160266; DEG10250249;DEG10230235; DEG10010201; DEG10030020; DEG10020105; DEG10070223; DEG10120263; DEG10210156;DEG10170123; DEG10310212;
/gene_family="98" /family_size="39"	11	DEG10200464; DEG10340069; DEG10130150; DEG10150327; DEG10330283; DEG10160279; DEG10100425;DEG10180539; DEG10190250; DEG10320305; DEG10220208;
/gene_family="1450" /family_size="39"	2	DEG10260039; DEG10220459;
/gene_family="51" /family_size="39"	1	DEG10310206;
/gene_family="1219" /family_size="39"	8	DEG10080176; DEG10130223; DEG10240130; DEG10280511; DEG10100409; DEG10200242; DEG10250497;DEG10120146;
/gene_family="326" /family_size="39"	20	DEG10120139; DEG10130040; DEG10190012; DEG10290366; DEG10220119; DEG10240108; DEG10110007;DEG10330016; DEG10340062; DEG10230209; DEG10010104; DEG10180017; DEG10070140; DEG10320016;DEG10170128; DEG10200347; DEG10050407; DEG10160015; DEG10210060; DEG10020108;
/gene_family="564" /family_size="39"	19	DEG10240352; DEG10340327; DEG10200029; DEG10330280; DEG10170002; DEG10190254; DEG10130001;DEG10080082; DEG10320308; DEG10250002; DEG10270002; DEG10210002; DEG10280290; DEG10160276;DEG10050350; DEG10290005; DEG10010002; DEG10230072; DEG10120002;
/gene_family="977" /family_size="39"	17	DEG10130314; DEG10200429; DEG10270047; DEG10260008; DEG10240373; DEG10250042; DEG10290181;DEG10270299; DEG10250319; DEG10200362; DEG10120353; DEG10100257; DEG10310044; DEG10270291;DEG10280213; DEG10280155; DEG10150207;
/gene_family="72" /family_size="40"	11	DEG10120295; DEG10060302; DEG10170142; DEG10200172; DEG10030394; DEG10010116; DEG10140056;DEG10240197; DEG10080033; DEG10020118; DEG10280387;
/gene_family="293" /family_size="39"	18	DEG10080298; DEG10240039; DEG10130069; DEG10150312; DEG10200462; DEG10310032; DEG10180556;DEG10270105; DEG10330251; DEG10290354; DEG10250115; DEG10120116; DEG10010158; DEG10280534;DEG10100080; DEG10160248; DEG10320317; DEG10020160;
/gene_family="556" /family_size="39"	1	DEG10180199;
/gene_family="288" /family_size="39"	1	DEG10080048;
/gene_family="1727" /family_size="39"	6	DEG10120084; DEG10050257; DEG10080086; DEG10100197; DEG10140043; DEG10010256;
/gene_family="1485" /family_size="39"	3	DEG10290292; DEG10340117; DEG10220025;
/gene_family="1312" /family_size="39"	5	DEG10080149; DEG10160211; DEG10200453; DEG10150304; DEG10330214;
/gene_family="163" /family_size="40"	2	DEG10100307; DEG10020282;
/gene_family="354" /family_size="39"	1	DEG10310178;
/gene_family="1209" /family_size="39"	9	DEG10050247; DEG10190006; DEG10290313; DEG10200216; DEG10030082; DEG10080224; DEG10240044;DEG10310166; DEG10180011;
/gene_family="1277" /family_size="39"	39	DEG10050170; DEG10240368; DEG10130359; DEG10120214; DEG10230066; DEG10120244; DEG10330297;DEG10240025; DEG10100429; DEG10010178; DEG10210087; DEG10060210; DEG10150019; DEG10340317;DEG10030098; DEG10330220; DEG10180521; DEG10200376; DEG10020169; DEG10200372; DEG10320295;DEG10140168; DEG10170207; DEG10290383; DEG10130183; DEG10100430; DEG10160293; DEG10280050;DEG10270489; DEG10180457; DEG10220126; …
/gene_family="1097" /family_size="39"	1	DEG10050191;
/gene_family="1224" /family_size="39"	1	DEG10080323;
/gene_family="205" /family_size="39"	3	DEG10080026; DEG10010089; DEG10300031;
/gene_family="1245" /family_size="39"	6	DEG10270227; DEG10130039; DEG10100193; DEG10250232; DEG10240268; DEG10280519;
/gene_family="1487" /family_size="39"	11	DEG10080174; DEG10190195; DEG10270215; DEG10180482; DEG10290342; DEG10290343; DEG10250223;DEG10330241; DEG10100181; DEG10030114; DEG10160238;
/gene_family="1178" /family_size="39"	7	DEG10340398; DEG10230115; DEG10180135; DEG10310048; DEG10220461; DEG10080042; DEG10310129;
/gene_family="984" /family_size="39"	1	DEG10340298;
/gene_family="123" /family_size="39"	3	DEG10050008; DEG10060078; DEG10240306;
/gene_family="686" /family_size="39"	19	DEG10170232; DEG10220367; DEG10160172; DEG10240150; DEG10290273; DEG10250509; DEG10280196;DEG10320051; DEG10190047; DEG10180073; DEG10130098; DEG10120246; DEG10120245; DEG10140255;DEG10080314; DEG10270478; DEG10310147; DEG10330175; DEG10200292;
/gene_family="1021" /family_size="39"	1	DEG10050019;
/gene_family="93" /family_size="39"	25	DEG10290369; DEG10240105; DEG10130458; DEG10230209; DEG10050407; DEG10220117; DEG10280459;DEG10070075; DEG10200350; DEG10180016; DEG10320013; DEG10170105; DEG10250412; DEG10170128;DEG10020108; DEG10120133; DEG10340064; DEG10150255; DEG10330013; DEG10010102; DEG10160012;DEG10230211; DEG10110006; DEG10190009; DEG10210154;
/gene_family="1011" /family_size="39"	5	DEG10130074; DEG10050213; DEG10200001; DEG10280294; DEG10080238;
/gene_family="1467" /family_size="39"	100	DEG10030734; DEG10100216; DEG10340077; DEG10330114; DEG10060061; DEG10060062; DEG10100381;DEG10100446; DEG10020083; DEG10050540; DEG10050542; DEG10200045; DEG10270222; DEG10250225;DEG10080054; DEG10130324; DEG10330295; DEG10150123; DEG10180246; DEG10300009; DEG10050262;DEG10260086; DEG10050394; DEG10050060; DEG10070110; DEG10030320; DEG10290200; DEG10060049;DEG10250613; DEG10270176; DEG10230224; …
/gene_family="611" /family_size="39"	26	DEG10340131; DEG10120312; DEG10120314; DEG10290159; DEG10080030; DEG10220445; DEG10030438;DEG10220443; DEG10190039; DEG10190037; DEG10160044; DEG10050331; DEG10160042; DEG10330045;DEG10130202; DEG10330043; DEG10200254; DEG10290161; DEG10030440; DEG10080273; DEG10240245;DEG10320043; DEG10320041; DEG10240243; DEG10180048; DEG10110021;
/gene_family="307" /family_size="39"	26	DEG10060163; DEG10290191; DEG10010203; DEG10100279; DEG10020209; DEG10230029; DEG10050469;DEG10280241; DEG10320132; DEG10190117; DEG10130382; DEG10070033; DEG10110079; DEG10020102;DEG10170121; DEG10200120; DEG10330101; DEG10120201; DEG10160099; DEG10210099; DEG10340303;DEG10220450; DEG10270316; DEG10030249; DEG10250345; DEG10140133;
/gene_family="1030" /family_size="40"	2	DEG10020280; DEG10020281;
/gene_family="933" /family_size="39"	1	DEG10080041;
/gene_family="1441" /family_size="39"	3	DEG10180361; DEG10290322; DEG10150063;
/gene_family="706" /family_size="39"	1	DEG10080228;
/gene_family="1105" /family_size="39"	74	DEG10190182; DEG10150286; DEG10130313; DEG10340049; DEG10230160; DEG10170048; DEG10170049;DEG10050638; DEG10020086; DEG10160298; DEG10060366; DEG10220422; DEG10280185; DEG10010033;DEG10110190; DEG10010032; DEG10100449; DEG10170166; DEG10100100; DEG10270119; DEG10180509;DEG10180568; DEG10250132; DEG10320249; DEG10340483; DEG10330225; DEG10120342; DEG10110170;DEG10140160; DEG10070012; DEG10330302; …
/gene_family="1627" /family_size="39"	11	DEG10180397; DEG10080111; DEG10320206; DEG10020121; DEG10010120; DEG10190150; DEG10250569;DEG10270525; DEG10100468; DEG10290130; DEG10050006;
/gene_family="721" /family_size="39"	5	DEG10080062; DEG10270097; DEG10250107; DEG10010164; DEG10100072;
/gene_family="341" /family_size="39"	1	DEG10080292;
/gene_family="935" /family_size="39"	19	DEG10130446; DEG10050095; DEG10280270; DEG10240192; DEG10010126; DEG10160179; DEG10140172;DEG10060360; DEG10320213; DEG10200031; DEG10180403; DEG10210125; DEG10330181; DEG10030113;DEG10020127; DEG10290137; DEG10170151; DEG10100463; DEG10190155;
/gene_family="469" /family_size="39"	18	DEG10240379; DEG10190135; DEG10290271; DEG10230069; DEG10340325; DEG10160070; DEG10270448;DEG10170239; DEG10320189; DEG10100395; DEG10210035; DEG10130105; DEG10030211; DEG10250478;DEG10200434; DEG10220311; DEG10070126; DEG10330072;
/gene_family="783" /family_size="39"	2	DEG10290171; DEG10180098;
/gene_family="598" /family_size="39"	21	DEG10240299; DEG10190184; DEG10230277; DEG10340120; DEG10120163; DEG10080192; DEG10130342;DEG10160226; DEG10280402; DEG10220007; DEG10110173; DEG10330229; DEG10140307; DEG10250704;DEG10250396; DEG10200390; DEG10290109; DEG10060369; DEG10100569; DEG10030130; DEG10020038;
/gene_family="1296" /family_size="39"	66	DEG10330352; DEG10290306; DEG10180599; DEG10330151; DEG10240062; DEG10170264; DEG10150075;DEG10310102; DEG10060273; DEG10230038; DEG10050502; DEG10020186; DEG10160347; DEG10160003;DEG10310141; DEG10230300; DEG10200472; DEG10340272; DEG10120199; DEG10220095; DEG10120108;DEG10130006; DEG10160148; DEG10280125; DEG10150271; DEG10270288; DEG10200161; DEG10190066;DEG10170240; DEG10010218; DEG10140025; …
/gene_family="867" /family_size="39"	1	DEG10200177;
/gene_family="64" /family_size="39"	12	DEG10340130; DEG10290359; DEG10160022; DEG10190019; DEG10030474; DEG10330023; DEG10080179;DEG10240116; DEG10320023; DEG10220444; DEG10120033; DEG10200290;
/gene_family="660" /family_size="39"	1	DEG10080242;
/gene_family="1083" /family_size="39"	2	DEG10280137; DEG10200032;
/gene_family="451" /family_size="39"	1	DEG10080320;
/gene_family="1488" /family_size="39"	2	DEG10200392; DEG10030351;
/gene_family="425" /family_size="39"	6	DEG10050027; DEG10030362; DEG10230094; DEG10340361; DEG10120346; DEG10220142;
/gene_family="486" /family_size="39"	11	DEG10340470; DEG10290043; DEG10080257; DEG10220410; DEG10170323; DEG10010046; DEG10280172;DEG10310219; DEG10200146; DEG10140230; DEG10020267;
/gene_family="1314" /family_size="39"	2	DEG10080058; DEG10320221;
/gene_family="597" /family_size="39"	2	DEG10080286; DEG10080267;
/gene_family="1406" /family_size="39"	1	DEG10080308;
/gene_family="518" /family_size="39"	16	DEG10270333; DEG10320089; DEG10270604; DEG10230298; DEG10200461; DEG10270494; DEG10330140;DEG10220084; DEG10130148; DEG10280400; DEG10250365; DEG10030370; DEG10190073; DEG10250533;DEG10340146; DEG10100436;
/gene_family="1215" /family_size="39"	63	DEG10210136; DEG10190182; DEG10150286; DEG10130313; DEG10340049; DEG10230160; DEG10170048;DEG10170049; DEG10050638; DEG10020086; DEG10160298; DEG10060366; DEG10220422; DEG10010032;DEG10010033; DEG10110190; DEG10280185; DEG10170166; DEG10100100; DEG10270119; DEG10180509;DEG10130146; DEG10320249; DEG10340483; DEG10330225; DEG10120342; DEG10110170; DEG10140160;DEG10070012; DEG10330302; DEG10160222; …
/gene_family="152" /family_size="39"	27	DEG10330155; DEG10130459; DEG10240104; DEG10310081; DEG10050014; DEG10340446; DEG10210169;DEG10240391; DEG10230245; DEG10180015; DEG10320012; DEG10290100; DEG10340065; DEG10160152;DEG10200189; DEG10290370; DEG10330012; DEG10010101; DEG10120151; DEG10030196; DEG10160011;DEG10180109; DEG10320068; DEG10110005; DEG10190008; DEG10070129; DEG10190062;
/gene_family="572" /family_size="39"	3	DEG10080268; DEG10310064; DEG10200320;
/gene_family="1622" /family_size="39"	1	DEG10050393;
/gene_family="277" /family_size="39"	2	DEG10050485; DEG10070194;
/gene_family="838" /family_size="39"	10	DEG10130444; DEG10100481; DEG10050037; DEG10030715; DEG10120281; DEG10050155; DEG10050562;DEG10250587; DEG10220111; DEG10020204;
/gene_family="1237" /family_size="39"	1	DEG10080100;
/gene_family="967" /family_size="39"	24	DEG10200195; DEG10030494; DEG10170210; DEG10100373; DEG10150241; DEG10120258; DEG10310082;DEG10130311; DEG10230249; DEG10340440; DEG10140144; DEG10220018; DEG10180396; DEG10010182;DEG10250457; DEG10060319; DEG10270425; DEG10050005; DEG10160053; DEG10320205; DEG10240204;DEG10190149; DEG10330054; DEG10290131;
/gene_family="1386" /family_size="39"	1	DEG10080304;
/gene_family="1371" /family_size="39"	2	DEG10100049; DEG10250075;
/gene_family="616" /family_size="39"	1	DEG10290284;
/gene_family="116" /family_size="39"	12	DEG10200178; DEG10130246; DEG10160090; DEG10190107; DEG10320160; DEG10230296; DEG10220071;DEG10340144; DEG10330092; DEG10290324; DEG10030421; DEG10240220;
/gene_family="554" /family_size="39"	15	DEG10010139; DEG10220113; DEG10330298; DEG10130082; DEG10340074; DEG10050206; DEG10240377;DEG10100582; DEG10160294; DEG10150120; DEG10250719; DEG10230221; DEG10320294; DEG10190236;DEG10180519;
/gene_family="759" /family_size="39"	15	DEG10340026; DEG10190004; DEG10240136; DEG10080085; DEG10200436; DEG10030471; DEG10050467;DEG10280033; DEG10130496; DEG10150289; DEG10330006; DEG10320008; DEG10290098; DEG10180009;DEG10160006;
/gene_family="542" /family_size="39"	26	DEG10290056; DEG10060148; DEG10100546; DEG10230142; DEG10250676; DEG10030512; DEG10210029;DEG10160325; DEG10190205; DEG10110177; DEG10240313; DEG10130408; DEG10120307; DEG10170308;DEG10330329; DEG10010062; DEG10050288; DEG10120078; DEG10340455; DEG10020252; DEG10270605;DEG10140215; DEG10220394; DEG10280159; DEG10320265; DEG10200158;
/gene_family="985" /family_size="39"	24	DEG10170170; DEG10160080; DEG10290176; DEG10120048; DEG10150154; DEG10240207; DEG10270493;DEG10050057; DEG10080172; DEG10320177; DEG10250531; DEG10020141; DEG10130054; DEG10180325;DEG10100434; DEG10010141; DEG10210216; DEG10190127; DEG10330082; DEG10280394; DEG10200360;DEG10140058; DEG10070243; DEG10030246;
/gene_family="1000" /family_size="39"	3	DEG10010265; DEG10020006; DEG10030065;
/gene_family="1143" /family_size="39"	1	DEG10080259;
/gene_family="124" /family_size="39"	22	DEG10130237; DEG10100233; DEG10010240; DEG10290093; DEG10140086; DEG10160203; DEG10190170;DEG10320237; DEG10340353; DEG10170078; DEG10070030; DEG10330206; DEG10210041; DEG10220080;DEG10050168; DEG10060241; DEG10030088; DEG10180437; DEG10270262; DEG10250275; DEG10020071;DEG10230087;
/gene_family="1669" /family_size="39"	4	DEG10110035; DEG10260003; DEG10240285; DEG10300033;
/gene_family="1604" /family_size="39"	4	DEG10170200; DEG10270198; DEG10180311; DEG10210139;
/gene_family="1123" /family_size="39"	4	DEG10180533; DEG10280393; DEG10170037; DEG10050195;
/gene_family="1131" /family_size="39"	2	DEG10080204; DEG10310007;
/gene_family="360" /family_size="39"	4	DEG10070092; DEG10050041; DEG10020111; DEG10080065;
/gene_family="1182" /family_size="39"	2	DEG10170028; DEG10220047;
/gene_family="1119" /family_size="39"	5	DEG10310013; DEG10120241; DEG10170211; DEG10200014; DEG10150070;
/gene_family="612" /family_size="39"	100	DEG10030734; DEG10340077; DEG10330114; DEG10060061; DEG10060062; DEG10180114; DEG10100446;DEG10320088; DEG10020083; DEG10050542; DEG10270222; DEG10250225; DEG10080054; DEG10130324;DEG10330295; DEG10150123; DEG10180246; DEG10300009; DEG10260086; DEG10050394; DEG10050060;DEG10320118; DEG10030320; DEG10330135; DEG10290200; DEG10250613; DEG10270176; DEG10210103;DEG10200045; DEG10140106; DEG10110057; …
/gene_family="663" /family_size="39"	1	DEG10180447;
/gene_family="944" /family_size="39"	2	DEG10100363; DEG10270560;
/gene_family="1010" /family_size="39"	7	DEG10280453; DEG10210106; DEG10200343; DEG10070176; DEG10010106; DEG10310215; DEG10170067;
/gene_family="1465" /family_size="39"	19	DEG10150083; DEG10230133; DEG10130094; DEG10330060; DEG10180382; DEG10320200; DEG10270515;DEG10160059; DEG10200113; DEG10290283; DEG10030163; DEG10340514; DEG10190145; DEG10250555;DEG10240275; DEG10010176; DEG10310085; DEG10120242; DEG10220209;
/gene_family="418" /family_size="39"	28	DEG10290363; DEG10330019; DEG10030478; DEG10020208; DEG10230206; DEG10190015; DEG10050055;DEG10110010; DEG10130482; DEG10320019; DEG10100324; DEG10170261; DEG10240111; DEG10010217;DEG10340060; DEG10310136; DEG10160018; DEG10150250; DEG10280455; DEG10270375; DEG10070186;DEG10180020; DEG10200344; DEG10250406; DEG10220122; DEG10050409; DEG10210157; DEG10290323;
/gene_family="236" /family_size="39"	5	DEG10220004; DEG10110205; DEG10180400; DEG10130381; DEG10150321;
/gene_family="1513" /family_size="39"	1	DEG10310226;
/gene_family="580" /family_size="39"	26	DEG10240124; DEG10030179; DEG10010134; DEG10340293; DEG10220203; DEG10160049; DEG10140065;DEG10130123; DEG10250551; DEG10290274; DEG10170161; DEG10120305; DEG10270508; DEG10230053;DEG10280231; DEG10210193; DEG10100451; DEG10150236; DEG10050246; DEG10320048; DEG10180054;DEG10020134; DEG10190044; DEG10200267; DEG10330050; DEG10070124;
/gene_family="112" /family_size="39"	6	DEG10020107; DEG10010244; DEG10210168; DEG10170069; DEG10170127; DEG10070014;
/gene_family="1045" /family_size="39"	2	DEG10310073; DEG10050324;
/gene_family="970" /family_size="39"	2	DEG10180316; DEG10080071;
/gene_family="797" /family_size="39"	22	DEG10010224; DEG10010227; DEG10240100; DEG10120370; DEG10270021; DEG10130066; DEG10130064;DEG10200271; DEG10240098; DEG10310198; DEG10200272; DEG10270568; DEG10270569; DEG10120369;DEG10280335; DEG10280336; DEG10250624; DEG10240099; DEG10200270; DEG10100009; DEG10310199;DEG10260050;
/gene_family="930" /family_size="39"	1	DEG10080190;
/gene_family="257" /family_size="39"	2	DEG10080284; DEG10310149;
/gene_family="233" /family_size="39"	3	DEG10050625; DEG10060322; DEG10140290;
/gene_family="739" /family_size="39"	11	DEG10320109; DEG10200017; DEG10190085; DEG10290308; DEG10150272; DEG10160121; DEG10330123;DEG10130011; DEG10110070; DEG10180175; DEG10030145;
/gene_family="1595" /family_size="39"	10	DEG10170188; DEG10340270; DEG10050632; DEG10080098; DEG10240391; DEG10250014; DEG10230032;DEG10310062; DEG10050303; DEG10220170;
/gene_family="645" /family_size="39"	13	DEG10070209; DEG10030067; DEG10010072; DEG10080161; DEG10270600; DEG10330338; DEG10230282;DEG10100540; DEG10290334; DEG10250669; DEG10050568; DEG10210054; DEG10220247;
/gene_family="760" /family_size="39"	1	DEG10080180;
/gene_family="455" /family_size="39"	1	DEG10050541;
/gene_family="201" /family_size="39"	2	DEG10030708; DEG10080118;
/gene_family="903" /family_size="39"	3	DEG10100219; DEG10250257; DEG10020113;
/gene_family="1395" /family_size="39"	2	DEG10080212; DEG10310094;
/gene_family="1122" /family_size="39"	25	DEG10110186; DEG10290039; DEG10120060; DEG10150039; DEG10030530; DEG10050272; DEG10160307;DEG10250140; DEG10100110; DEG10060129; DEG10190222; DEG10200142; DEG10170327; DEG10240330;DEG10130425; DEG10010042; DEG10340474; DEG10220413; DEG10020271; DEG10270128; DEG10140234;DEG10210017; DEG10280176; DEG10320282; DEG10330311;
/gene_family="1223" /family_size="39"	19	DEG10330002; DEG10250541; DEG10290307; DEG10170167; DEG10230136; DEG10190001; DEG10060117;DEG10130007; DEG10080197; DEG10210100; DEG10340505; DEG10100439; DEG10180005; DEG10220205;DEG10270501; DEG10320004; DEG10160002; DEG10030146; DEG10120109;
/gene_family="809" /family_size="39"	1	DEG10080057;
/gene_family="1066" /family_size="39"	27	DEG10230126; DEG10130197; DEG10290153; DEG10270518; DEG10010131; DEG10330037; DEG10120044;DEG10050292; DEG10340098; DEG10150096; DEG10320036; DEG10170158; DEG10190031; DEG10240237;DEG10250559; DEG10070051; DEG10210145; DEG10280062; DEG10060354; DEG10030447; DEG10100457;DEG10310023; DEG10160036; DEG10140072; DEG10200260; DEG10220391; DEG10180042;
/gene_family="1324" /family_size="39"	3	DEG10250216; DEG10080108; DEG10270206;
/gene_family="506" /family_size="39"	12	DEG10290348; DEG10270457; DEG10050483; DEG10100399; DEG10250613; DEG10120209; DEG10050464;DEG10020097; DEG10020061; DEG10250487; DEG10140271; DEG10020225;
/gene_family="1433" /family_size="39"	28	DEG10270537; DEG10230162; DEG10220100; DEG10050111; DEG10150119; DEG10280365; DEG10210203;DEG10160067; DEG10190138; DEG10020041; DEG10070232; DEG10140266; DEG10130461; DEG10100479;DEG10170036; DEG10330068; DEG10320192; DEG10120039; DEG10250585; DEG10030428; DEG10010021;DEG10310173; DEG10180366; DEG10280246; DEG10340494; DEG10240227; DEG10200249; DEG10060373;
/gene_family="864" /family_size="39"	1	DEG10080189;
/gene_family="17" /family_size="39"	4	DEG10060059; DEG10250714; DEG10140154; DEG10140104;
/gene_family="740" /family_size="39"	1	DEG10080318;
/gene_family="361" /family_size="39"	19	DEG10180546; DEG10100155; DEG10270188; DEG10170026; DEG10330274; DEG10130492; DEG10250191;DEG10240016; DEG10290393; DEG10030557; DEG10120121; DEG10010012; DEG10070055; DEG10190261;DEG10020033; DEG10320313; DEG10210149; DEG10200326; DEG10160270;
/gene_family="708" /family_size="39"	18	DEG10010237; DEG10100156; DEG10130245; DEG10320227; DEG10060336; DEG10140199; DEG10290297;DEG10250192; DEG10110158; DEG10170081; DEG10330196; DEG10020073; DEG10270189; DEG10160193;DEG10210097; DEG10070168; DEG10190165; DEG10120154;
/gene_family="772" /family_size="39"	7	DEG10270216; DEG10100182; DEG10250224; DEG10110125; DEG10120200; DEG10280234; DEG10200304;
/gene_family="509" /family_size="39"	7	DEG10290311; DEG10260101; DEG10200034; DEG10060091; DEG10250171; DEG10120162; DEG10100140;
/gene_family="135" /family_size="39"	56	DEG10290348; DEG10270457; DEG10180596; DEG10250487; DEG10050394; DEG10190094; DEG10020222;DEG10060029; DEG10230224; DEG10050424; DEG10070090; DEG10220139; DEG10220079; DEG10020061;DEG10050047; DEG10140145; DEG10320256; DEG10180114; DEG10020286; DEG10310192; DEG10210094;DEG10330160; DEG10070110; DEG10200440; DEG10150163; DEG10340077; DEG10150164; DEG10120209;DEG10160157; DEG10120130; DEG10060150; …
/gene_family="625" /family_size="39"	20	DEG10060015; DEG10130236; DEG10320236; DEG10250065; DEG10230088; DEG10160202; DEG10210186;DEG10180436; DEG10290094; DEG10140030; DEG10070138; DEG10170299; DEG10330205; DEG10010257;DEG10020239; DEG10240050; DEG10310075; DEG10190169; DEG10150018; DEG10030089;
/gene_family="296" /family_size="39"	1	DEG10280407;
/gene_family="1140" /family_size="39"	25	DEG10130456; DEG10290367; DEG10330015; DEG10240107; DEG10010244; DEG10190011; DEG10020107;DEG10280457; DEG10220118; DEG10210168; DEG10250410; DEG10320015; DEG10100328; DEG10170127;DEG10070014; DEG10120138; DEG10030481; DEG10340063; DEG10150253; DEG10270379; DEG10010103;DEG10160014; DEG10200348; DEG10230210; DEG10170069;
/gene_family="494" /family_size="39"	5	DEG10260012; DEG10130186; DEG10270373; DEG10250401; DEG10300053;
/gene_family="110" /family_size="39"	1	DEG10310176;
/gene_family="1048" /family_size="39"	1	DEG10080020;
/gene_family="873" /family_size="39"	21	DEG10050078; DEG10130171; DEG10220066; DEG10010190; DEG10320121; DEG10330111; DEG10150145;DEG10030233; DEG10340188; DEG10140213; DEG10170224; DEG10240148; DEG10180190; DEG10170225;DEG10250594; DEG10200115; DEG10160109; DEG10060237; DEG10020179; DEG10290250; DEG10210215;
/gene_family="789" /family_size="39"	1	DEG10050065;
/gene_family="195" /family_size="39"	5	DEG10030463; DEG10100177; DEG10270212; DEG10150093; DEG10250219;
/gene_family="629" /family_size="39"	2	DEG10020103; DEG10050235;
/gene_family="859" /family_size="39"	8	DEG10310004; DEG10170034; DEG10340011; DEG10130390; DEG10180033; DEG10190023; DEG10290090;DEG10240160;
/gene_family="225" /family_size="39"	2	DEG10080178; DEG10310015;
/gene_family="1650" /family_size="39"	11	DEG10220405; DEG10340465; DEG10170318; DEG10210023; DEG10010051; DEG10200151; DEG10140225;DEG10020262; DEG10100118; DEG10280167; DEG10310216;
/gene_family="1025" /family_size="39"	12	DEG10290238; DEG10330064; DEG10180376; DEG10200039; DEG10160063; DEG10320196; DEG10190141;DEG10240231; DEG10280397; DEG10130124; DEG10110140; DEG10030414;
/gene_family="130" /family_size="39"	99	DEG10030734; DEG10100216; DEG10320118; DEG10340077; DEG10330114; DEG10330295; DEG10180114;DEG10050394; DEG10020083; DEG10220139; DEG10270222; DEG10080054; DEG10130324; DEG10120209;DEG10060062; DEG10150123; DEG10180246; DEG10280312; DEG10050262; DEG10260086; DEG10100446;DEG10050060; DEG10190094; DEG10030320; DEG10290200; DEG10060049; DEG10250613; DEG10270176;DEG10210103; DEG10250467; DEG10050426; …
/gene_family="1413" /family_size="39"	16	DEG10340546; DEG10120279; DEG10160196; DEG10230179; DEG10320230; DEG10130089; DEG10220176;DEG10240069; DEG10050325; DEG10030142; DEG10330199; DEG10290126; DEG10280140; DEG10180429;DEG10190168; DEG10200081;
/gene_family="1183" /family_size="39"	1	DEG10120176;
/gene_family="1360" /family_size="39"	13	DEG10100612; DEG10200476; DEG10270326; DEG10340116; DEG10100296; DEG10080211; DEG10290241;DEG10250769; DEG10250359; DEG10270686; DEG10060381; DEG10220037; DEG10280298;
/gene_family="1637" /family_size="39"	2	DEG10250302; DEG10220230;
/gene_family="584" /family_size="39"	16	DEG10290065; DEG10200477; DEG10240272; DEG10220347; DEG10310006; DEG10160253; DEG10330256;DEG10100196; DEG10340350; DEG10120308; DEG10230082; DEG10250235; DEG10020238; DEG10270230;DEG10030039; DEG10320314;
/gene_family="720" /family_size="39"	8	DEG10080089; DEG10030222; DEG10290185; DEG10050439; DEG10310120; DEG10180087; DEG10140122;DEG10060229;
/gene_family="1016" /family_size="39"	6	DEG10300089; DEG10270452; DEG10070192; DEG10100397; DEG10110034; DEG10250482;
/gene_family="832" /family_size="39"	2	DEG10300049; DEG10170015;
/gene_family="1070" /family_size="39"	22	DEG10240060; DEG10160280; DEG10120254; DEG10110199; DEG10280533; DEG10250263; DEG10190249;DEG10030025; DEG10220381; DEG10070173; DEG10320304; DEG10200463; DEG10130400; DEG10150326;DEG10230070; DEG10100225; DEG10330284; DEG10270252; DEG10340326; DEG10020114; DEG10170135;DEG10180538;
/gene_family="987" /family_size="39"	16	DEG10330030; DEG10130169; DEG10250347; DEG10020011; DEG10180034; DEG10130133; DEG10160029;DEG10120184; DEG10050560; DEG10280148; DEG10100283; DEG10250313; DEG10190024; DEG10280191;DEG10290122; DEG10240171;
/gene_family="770" /family_size="39"	47	DEG10050637; DEG10100217; DEG10330119; DEG10190110; DEG10150130; DEG10120274; DEG10120252;DEG10020085; DEG10160104; DEG10110097; DEG10210181; DEG10010118; DEG10340259; DEG10320154;DEG10270613; DEG10020120; DEG10050073; DEG10120298; DEG10030391; DEG10170104; DEG10320113;DEG10290259; DEG10110073; DEG10280021; DEG10170144; DEG10280498; DEG10120206; DEG10280522;DEG10330106; DEG10270276; DEG10160117; …
/gene_family="986" /family_size="39"	1	DEG10080117;
/gene_family="709" /family_size="39"	2	DEG10020025; DEG10020076;
/gene_family="48" /family_size="64"	1	DEG10080247;
/gene_family="792" /family_size="39"	1	DEG10080059;
/gene_family="461" /family_size="39"	3	DEG10080315; DEG10280214; DEG10310214;
/gene_family="715" /family_size="39"	1	DEG10080115;
/gene_family="758" /family_size="39"	1	DEG10080044;
/gene_family="1459" /family_size="39"	1	DEG10080210;
/gene_family="996" /family_size="39"	6	DEG10310117; DEG10070062; DEG10170193; DEG10010160; DEG10210064; DEG10080144;
/gene_family="1518" /family_size="39"	26	DEG10290052; DEG10170314; DEG10130412; DEG10180492; DEG10010055; DEG10060141; DEG10230145;DEG10030517; DEG10220401; DEG10340461; DEG10250145; DEG10160320; DEG10210025; DEG10270133;DEG10140222; DEG10240319; DEG10190209; DEG10280163; DEG10330324; DEG10120073; DEG10110180;DEG10080252; DEG10020258; DEG10200154; DEG10320269; DEG10100121;
/gene_family="435" /family_size="39"	23	DEG10240128; DEG10100146; DEG10120148; DEG10250655; DEG10010173; DEG10100527; DEG10050338;DEG10160243; DEG10330246; DEG10190200; DEG10170202; DEG10130221; DEG10150294; DEG10100471;DEG10290086; DEG10270529; DEG10250178; DEG10210177; DEG10270588; DEG10030037; DEG10320260;DEG10070024; DEG10200244;
/gene_family="969" /family_size="39"	9	DEG10170220; DEG10250200; DEG10050182; DEG10070073; DEG10140210; DEG10310029; DEG10020176;DEG10060232; DEG10080151;
/gene_family="561" /family_size="39"	1	DEG10310017;
/gene_family="1602" /family_size="39"	7	DEG10220363; DEG10020246; DEG10060327; DEG10280130; DEG10080091; DEG10250485; DEG10140248;
/gene_family="596" /family_size="41"	15	DEG10200011; DEG10130033; DEG10240074; DEG10180595; DEG10050058; DEG10120212; DEG10030510;DEG10140175; DEG10330351; DEG10250708; DEG10320347; DEG10060290; DEG10160346; DEG10270637;DEG10190292;
/gene_family="481" /family_size="39"	1	DEG10080198;
/gene_family="934" /family_size="39"	1	DEG10300030;
/gene_family="283" /family_size="39"	10	DEG10100044; DEG10250071; DEG10050311; DEG10020040; DEG10110149; DEG10020082; DEG10100561;DEG10020291; DEG10250696; DEG10270630;
/gene_family="1001" /family_size="39"	14	DEG10240155; DEG10130440; DEG10030208; DEG10290188; DEG10320060; DEG10160161; DEG10200479;DEG10120250; DEG10190056; DEG10150277; DEG10050419; DEG10180090; DEG10330164; DEG10110037;
/gene_family="209" /family_size="39"	2	DEG10290293; DEG10050234;
/gene_family="472" /family_size="39"	15	DEG10150293; DEG10320259; DEG10240129; DEG10160242; DEG10130222; DEG10330245; DEG10190199;DEG10280510; DEG10210179; DEG10070022; DEG10010174; DEG10170203; DEG10200243; DEG10030038;DEG10120147;
/gene_family="53" /family_size="39"	2	DEG10290215; DEG10340165;
/gene_family="465" /family_size="39"	23	DEG10130451; DEG10230101; DEG10010111; DEG10120168; DEG10340379; DEG10180540; DEG10140269;DEG10060088; DEG10080056; DEG10250261; DEG10200213; DEG10240176; DEG10210164; DEG10320306;DEG10290064; DEG10100223; DEG10330282; DEG10050642; DEG10160278; DEG10280276; DEG10220294;DEG10170134; DEG10190251;
/gene_family="234" /family_size="39"	5	DEG10190099; DEG10080175; DEG10290241; DEG10180197; DEG10260032;
/gene_family="1039" /family_size="39"	1	DEG10020299;
/gene_family="1157" /family_size="39"	1	DEG10050144;
/gene_family="635" /family_size="39"	8	DEG10070217; DEG10250330; DEG10280282; DEG10130102; DEG10020152; DEG10100268; DEG10270307;DEG10050519;
/gene_family="891" /family_size="39"	1	DEG10080280;
/gene_family="387" /family_size="39"	2	DEG10080052; DEG10110050;
/gene_family="827" /family_size="39"	7	DEG10170217; DEG10140130; DEG10340380; DEG10070097; DEG10290102; DEG10010186; DEG10060203;
/gene_family="754" /family_size="39"	1	DEG10080216;
/gene_family="157" /family_size="39"	1	DEG10220437;
/gene_family="725" /family_size="39"	11	DEG10130423; DEG10290041; DEG10160309; DEG10150041; DEG10180501; DEG10190220; DEG10030528;DEG10310220; DEG10320280; DEG10050274; DEG10330313;
/gene_family="2" /family_size="39"	8	DEG10080112; DEG10050092; DEG10130248; DEG10330069; DEG10250499; DEG10280523; DEG10100412;DEG10200378;
/gene_family="884" /family_size="39"	1	DEG10080126;
/gene_family="269" /family_size="39"	1	DEG10220282;
/gene_family="370" /family_size="39"	1	DEG10060106;
/gene_family="327" /family_size="39"	5	DEG10310008; DEG10240403; DEG10080203; DEG10280220; DEG10200395;
/gene_family="1449" /family_size="39"	1	DEG10080288;
/gene_family="1260" /family_size="39"	1	DEG10020063;
/gene_family="54" /family_size="39"	17	DEG10140069; DEG10010084; DEG10060081; DEG10080109; DEG10100486; DEG10150264; DEG10240010;DEG10280091; DEG10270544; DEG10130125; DEG10200330; DEG10020216; DEG10250591; DEG10170274;DEG10120382; DEG10070135; DEG10210057;
/gene_family="630" /family_size="39"	20	DEG10240299; DEG10190184; DEG10100569; DEG10230277; DEG10340120; DEG10110173; DEG10080192;DEG10130342; DEG10160226; DEG10220007; DEG10120163; DEG10330229; DEG10140307; DEG10250704;DEG10250396; DEG10200390; DEG10020038; DEG10060369; DEG10030130; DEG10290109;
/gene_family="1550" /family_size="39"	2	DEG10030084; DEG10060285;
/gene_family="1114" /family_size="39"	8	DEG10230123; DEG10240082; DEG10340105; DEG10130403; DEG10250084; DEG10220202; DEG10280061;DEG10120095;
/gene_family="1301" /family_size="39"	23	DEG10210197; DEG10340137; DEG10100232; DEG10270261; DEG10020194; DEG10280266; DEG10220016;DEG10230289; DEG10310185; DEG10170077; DEG10160091; DEG10130309; DEG10060242; DEG10050001;DEG10250274; DEG10180303; DEG10190123; DEG10130176; DEG10140018; DEG10320124; DEG10330093;DEG10020070; DEG10070229;
/gene_family="913" /family_size="39"	1	DEG10060210;
/gene_family="1218" /family_size="39"	6	DEG10240068; DEG10280502; DEG10100014; DEG10300056; DEG10250028; DEG10270032;
/gene_family="424" /family_size="39"	9	DEG10130179; DEG10130195; DEG10280190; DEG10100218; DEG10250256; DEG10100284; DEG10280094;DEG10270250; DEG10240054;
/gene_family="919" /family_size="39"	3	DEG10220198; DEG10310025; DEG10080018;
/gene_family="1187" /family_size="39"	1	DEG10080012;
/gene_family="733" /family_size="39"	6	DEG10130344; DEG10310028; DEG10250260; DEG10240301; DEG10270251; DEG10280053;
/gene_family="369" /family_size="39"	3	DEG10050448; DEG10060055; DEG10020066;
/gene_family="922" /family_size="39"	43	DEG10030559; DEG10200477; DEG10200418; DEG10310006; DEG10060328; DEG10150334; DEG10200416;DEG10080206; DEG10120357; DEG10120359; DEG10210080; DEG10130026; DEG10240272; DEG10220347;DEG10290397; DEG10290395; DEG10340350; DEG10130028; DEG10230082; DEG10250245; DEG10140165;DEG10280104; DEG10280102; DEG10250243; DEG10240358; DEG10240356; DEG10100205; DEG10100207;DEG10060330; DEG10100196; DEG10270239; …
/gene_family="514" /family_size="39"	1	DEG10080264;
/gene_family="804" /family_size="39"	3	DEG10080138; DEG10100502; DEG10250616;
/gene_family="1148" /family_size="39"	3	DEG10280275; DEG10050260; DEG10180524;
/gene_family="235" /family_size="41"	3	DEG10250536; DEG10270497; DEG10050459;
/gene_family="1194" /family_size="39"	18	DEG10290173; DEG10140091; DEG10320063; DEG10270593; DEG10160158; DEG10070147; DEG10150189;DEG10060008; DEG10310111; DEG10120105; DEG10100532; DEG10130339; DEG10330161; DEG10240209;DEG10190059; DEG10250662; DEG10110039; DEG10010172;
/gene_family="1473" /family_size="39"	8	DEG10230271; DEG10260033; DEG10300077; DEG10340112; DEG10290358; DEG10310161; DEG10200294;DEG10300022;
/gene_family="784" /family_size="39"	7	DEG10100267; DEG10130297; DEG10130101; DEG10280281; DEG10280366; DEG10250329; DEG10270306;
/gene_family="939" /family_size="39"	5	DEG10100256; DEG10250318; DEG10130109; DEG10280515; DEG10200361;
/gene_family="595" /family_size="39"	15	DEG10120311; DEG10290162; DEG10130270; DEG10340118; DEG10160045; DEG10190040; DEG10320044;DEG10230275; DEG10150103; DEG10180049; DEG10030437; DEG10330046; DEG10220024; DEG10200250;DEG10240246;
/gene_family="593" /family_size="39"	2	DEG10130129; DEG10310040;
/gene_family="805" /family_size="39"	8	DEG10250056; DEG10230020; DEG10340198; DEG10270058; DEG10100035; DEG10280385; DEG10270620;DEG10250687;
/gene_family="1055" /family_size="39"	1	DEG10310066;
/gene_family="957" /family_size="39"	26	DEG10230125; DEG10130196; DEG10270519; DEG10290152; DEG10120043; DEG10330036; DEG10320035;DEG10150095; DEG10070153; DEG10110017; DEG10190030; DEG10240236; DEG10210146; DEG10060353;DEG10340100; DEG10050387; DEG10310170; DEG10100458; DEG10030448; DEG10160035; DEG10140073;DEG10200261; DEG10220392; DEG10250560; DEG10180041; DEG10170157;
/gene_family="221" /family_size="39"	1	DEG10230080;
/gene_family="1432" /family_size="39"	3	DEG10140192; DEG10130252; DEG10060364;
/gene_family="1220" /family_size="39"	1	DEG10080297;
/gene_family="1372" /family_size="39"	1	DEG10080152;
/gene_family="539" /family_size="39"	3	DEG10290275; DEG10030408; DEG10180329;
/gene_family="1568" /family_size="39"	16	DEG10130442; DEG10150003; DEG10330291; DEG10120132; DEG10200165; DEG10180530; DEG10160287;DEG10240048; DEG10290008; DEG10320300; DEG10210172; DEG10070180; DEG10190243; DEG10280529;DEG10010181; DEG10110195;
/gene_family="968" /family_size="39"	43	DEG10200196; DEG10290228; DEG10320187; DEG10170177; DEG10120126; DEG10060003; DEG10170005;DEG10330078; DEG10200197; DEG10270005; DEG10150117; DEG10180351; DEG10160208; DEG10190132;DEG10180449; DEG10020004; DEG10140142; DEG10330211; DEG10110131; DEG10280495; DEG10280027;DEG10210120; DEG10210122; DEG10230048; DEG10290331; DEG10130327; DEG10140048; DEG10150298;DEG10060172; DEG10340287; DEG10030489; …
/gene_family="71" /family_size="39"	1	DEG10240141;
/gene_family="1624" /family_size="39"	1	DEG10080208;
/gene_family="1431" /family_size="39"	1	DEG10150009;
/gene_family="503" /family_size="39"	1	DEG10100236;
/gene_family="358" /family_size="39"	5	DEG10080110; DEG10150188; DEG10130165; DEG10240304; DEG10180056;
/gene_family="619" /family_size="39"	4	DEG10030230; DEG10130251; DEG10050367; DEG10250317;
/gene_family="91" /family_size="39"	1	DEG10080045;
/gene_family="1035" /family_size="39"	20	DEG10240119; DEG10180474; DEG10160231; DEG10050319; DEG10330234; DEG10130365; DEG10320253;DEG10120216; DEG10270106; DEG10190188; DEG10080038; DEG10250116; DEG10100081; DEG10310211;DEG10080157; DEG10200307; DEG10030075; DEG10010157; DEG10100535; DEG10290321;
/gene_family="1829" /family_size="39"	1	DEG10310196;
/gene_family="442" /family_size="39"	2	DEG10080050; DEG10340035;
/gene_family="1159" /family_size="39"	1	DEG10310162;
/gene_family="170" /family_size="39"	4	DEG10070188; DEG10260074; DEG10080136; DEG10020292;
/gene_family="331" /family_size="39"	19	DEG10180377; DEG10200132; DEG10080171; DEG10230047; DEG10330063; DEG10160062; DEG10320197;DEG10290178; DEG10220439; DEG10270496; DEG10130493; DEG10190142; DEG10250534; DEG10100437;DEG10280080; DEG10340286; DEG10010140; DEG10050109; DEG10150232;
/gene_family="39" /family_size="39"	21	DEG10270568; DEG10270569; DEG10010224; DEG10280336; DEG10250624; DEG10240099; DEG10240100;DEG10130066; DEG10200272; DEG10130064; DEG10200270; DEG10010227; DEG10120370; DEG10310198;DEG10100009; DEG10120369; DEG10260050; DEG10200271; DEG10240098; DEG10270021; DEG10310199;
/gene_family="1106" /family_size="39"	7	DEG10050171; DEG10100163; DEG10250206; DEG10300111; DEG10050505; DEG10270196; DEG10200306;
/gene_family="1546" /family_size="39"	40	DEG10330119; DEG10100217; DEG10150130; DEG10150072; DEG10230004; DEG10120252; DEG10210181;DEG10010118; DEG10340259; DEG10270613; DEG10020120; DEG10050073; DEG10120298; DEG10030391;DEG10280021; DEG10320113; DEG10290259; DEG10110073; DEG10230056; DEG10170144; DEG10100300;DEG10280498; DEG10120206; DEG10200210; DEG10100554; DEG10270276; DEG10160117; DEG10180180;DEG10230239; DEG10340452; DEG10220452; …
/gene_family="657" /family_size="39"	6	DEG10050636; DEG10060085; DEG10260028; DEG10110224; DEG10170082; DEG10110098;
/gene_family="576" /family_size="39"	11	DEG10130455; DEG10150310; DEG10290059; DEG10310038; DEG10050098; DEG10280003; DEG10120256;DEG10100411; DEG10080024; DEG10180518; DEG10200368;
/gene_family="785" /family_size="39"	1	DEG10100420;
/gene_family="773" /family_size="39"	16	DEG10240075; DEG10060315; DEG10160092; DEG10180294; DEG10290189; DEG10130350; DEG10320125;DEG10310106; DEG10330094; DEG10140251; DEG10210165; DEG10170279; DEG10020221; DEG10190122;DEG10030587; DEG10010068;
/gene_family="641" /family_size="39"	1	DEG10080300;
/gene_family="492" /family_size="39"	19	DEG10340544; DEG10220340; DEG10030027; DEG10210059; DEG10050210; DEG10130351; DEG10280005;DEG10200198; DEG10330286; DEG10290390; DEG10170116; DEG10160282; DEG10180537; DEG10070106;DEG10150013; DEG10120179; DEG10320302; DEG10240027; DEG10190247;
/gene_family="1761" /family_size="39"	10	DEG10100173; DEG10270037; DEG10270043; DEG10270209; DEG10270136; DEG10270512; DEG10250218;DEG10020294; DEG10130498; DEG10110085;
/gene_family="1363" /family_size="39"	23	DEG10190234; DEG10100529; DEG10060101; DEG10340429; DEG10250658; DEG10220010; DEG10170101;DEG10260068; DEG10290061; DEG10120321; DEG10130345; DEG10030541; DEG10020084; DEG10140295;DEG10080239; DEG10210217; DEG10200016; DEG10270590; DEG10230255; DEG10280420; DEG10180516;DEG10070244; DEG10010091;
/gene_family="399" /family_size="39"	12	DEG10060295; DEG10170042; DEG10120337; DEG10210112; DEG10240343; DEG10280380; DEG10130050;DEG10020045; DEG10140108; DEG10310054; DEG10200082; DEG10010026;
/gene_family="459" /family_size="39"	2	DEG10140102; DEG10020010;
/gene_family="966" /family_size="39"	21	DEG10220048; DEG10160079; DEG10180342; DEG10050455; DEG10250186; DEG10060013; DEG10320184;DEG10170025; DEG10190129; DEG10330081; DEG10270182; DEG10110126; DEG10120117; DEG10130122;DEG10010010; DEG10020031; DEG10100151; DEG10140185; DEG10210150; DEG10290247; DEG10280074;
/gene_family="1348" /family_size="39"	2	DEG10110041; DEG10260006;
/gene_family="40" /family_size="39"	13	DEG10060176; DEG10050080; DEG10340089; DEG10080162; DEG10260015; DEG10080123; DEG10050140;DEG10250308; DEG10180402; DEG10270289; DEG10180012; DEG10140111; DEG10220151;
/gene_family="1514" /family_size="39"	1	DEG10030168;
/gene_family="1033" /family_size="39"	6	DEG10300047; DEG10180224; DEG10280475; DEG10030372; DEG10110099; DEG10130271;
/gene_family="90" /family_size="39"	16	DEG10220364; DEG10180438; DEG10170174; DEG10140193; DEG10240134; DEG10250277; DEG10050368;DEG10160204; DEG10270265; DEG10290092; DEG10330207; DEG10200450; DEG10100237; DEG10020147;DEG10010146; DEG10280265;
/gene_family="352" /family_size="39"	3	DEG10180514; DEG10310010; DEG10150269;
/gene_family="613" /family_size="39"	1	DEG10080291;
/gene_family="477" /family_size="39"	1	DEG10080274;
/gene_family="975" /family_size="39"	49	DEG10030490; DEG10340055; DEG10170176; DEG10060002; DEG10170004; DEG10270004; DEG10190175;DEG10050551; DEG10160209; DEG10200287; DEG10230200; DEG10220076; DEG10020003; DEG10130002;DEG10140141; DEG10250003; DEG10020149; DEG10210123; DEG10290006; DEG10290333; DEG10030004;DEG10320307; DEG10240353; DEG10280496; DEG10120327; DEG10060171; DEG10330281; DEG10150299;DEG10130487; DEG10220341; DEG10010148; …
/gene_family="343" /family_size="39"	2	DEG10240087; DEG10200283;
/gene_family="672" /family_size="39"	5	DEG10240088; DEG10080241; DEG10200282; DEG10280326; DEG10120380;
/gene_family="522" /family_size="39"	1	DEG10310043;
/gene_family="179" /family_size="39"	1	DEG10080077;
/gene_family="962" /family_size="39"	14	DEG10130457; DEG10030482; DEG10340078; DEG10230225; DEG10080121; DEG10120135; DEG10230282;DEG10070206; DEG10220249; DEG10010070; DEG10210067; DEG10170291; DEG10220247; DEG10020229;
/gene_family="7" /family_size="39"	7	DEG10340398; DEG10230115; DEG10180135; DEG10310048; DEG10220461; DEG10080042; DEG10310129;
/gene_family="654" /family_size="39"	36	DEG10170021; DEG10160163; DEG10030223; DEG10220190; DEG10160114; DEG10330116; DEG10270640;DEG10060340; DEG10250711; DEG10240273; DEG10320058; DEG10070046; DEG10270651; DEG10210104;DEG10190054; DEG10020026; DEG10320116; DEG10070050; DEG10190092; DEG10330166; DEG10130241;DEG10290186; DEG10250726; DEG10010009; DEG10180088; DEG10010007; DEG10130274; DEG10120034;DEG10200228; DEG10200037; DEG10280012; …
/gene_family="11" /family_size="39"	27	DEG10010117; DEG10210182; DEG10220034; DEG10270320; DEG10120297; DEG10050074; DEG10030392;DEG10270361; DEG10070019; DEG10180179; DEG10280020; DEG10250351; DEG10320112; DEG10110072;DEG10100288; DEG10310011; DEG10170143; DEG10330120; DEG10230036; DEG10240199; DEG10160118;DEG10270072; DEG10250073; DEG10250388; DEG10200209; DEG10190088; DEG10020119;
/gene_family="1071" /family_size="39"	22	DEG10010224; DEG10010227; DEG10240100; DEG10120370; DEG10270021; DEG10130066; DEG10130064;DEG10200271; DEG10200270; DEG10310198; DEG10310199; DEG10270568; DEG10270569; DEG10120369;DEG10280335; DEG10280336; DEG10250624; DEG10240099; DEG10240098; DEG10100009; DEG10200272;DEG10260050;
/gene_family="591" /family_size="39"	2	DEG10310084; DEG10080116;
/gene_family="227" /family_size="39"	2	DEG10050599; DEG10060153;
/gene_family="406" /family_size="39"	1	DEG10080293;
/gene_family="850" /family_size="39"	2	DEG10290256; DEG10180128;
/gene_family="927" /family_size="39"	6	DEG10160245; DEG10330248; DEG10310071; DEG10320319; DEG10190267; DEG10110206;
/gene_family="647" /family_size="39"	1	DEG10080039;
/gene_family="1093" /family_size="39"	1	DEG10050265;
/gene_family="1017" /family_size="39"	1	DEG10050112;
/gene_family="1036" /family_size="39"	4	DEG10080095; DEG10270451; DEG10250481; DEG10340208;
/gene_family="302" /family_size="39"	7	DEG10130454; DEG10280002; DEG10050099; DEG10250498; DEG10310131; DEG10100410; DEG10200369;
/gene_family="626" /family_size="39"	2	DEG10310093; DEG10080213;
/gene_family="615" /family_size="39"	8	DEG10130310; DEG10200193; DEG10220141; DEG10180395; DEG10340415; DEG10240205; DEG10280428;DEG10290132;
/gene_family="1133" /family_size="39"	1	DEG10080043;
/gene_family="536" /family_size="39"	1	DEG10080306;
/gene_family="366" /family_size="39"	6	DEG10060264; DEG10270471; DEG10050296; DEG10140220; DEG10270364; DEG10140184;
/gene_family="946" /family_size="39"	19	DEG10020251; DEG10330330; DEG10060149; DEG10290057; DEG10030511; DEG10250675; DEG10150053;DEG10210030; DEG10130407; DEG10190204; DEG10080248; DEG10010063; DEG10160326; DEG10320264;DEG10200159; DEG10050289; DEG10240312; DEG10120079; DEG10170307;
/gene_family="1416" /family_size="39"	10	DEG10050171; DEG10100163; DEG10240072; DEG10250206; DEG10300111; DEG10050505; DEG10130043;DEG10270196; DEG10280306; DEG10200306;
/gene_family="156" /family_size="39"	11	DEG10280248; DEG10290302; DEG10230288; DEG10320054; DEG10220191; DEG10160169; DEG10100230;DEG10130490; DEG10180076; DEG10190050; DEG10330172;
/gene_family="912" /family_size="39"	4	DEG10310228; DEG10250511; DEG10290232; DEG10180312;
/gene_family="143" /family_size="39"	3	DEG10250216; DEG10080108; DEG10270206;
/gene_family="475" /family_size="39"	25	DEG10240003; DEG10310005; DEG10060300; DEG10010113; DEG10340404; DEG10170137; DEG10330331;DEG10230268; DEG10070214; DEG10160327; DEG10250267; DEG10290009; DEG10190203; DEG10030007;DEG10210163; DEG10180489; DEG10100227; DEG10150004; DEG10270255; DEG10220436; DEG10280463;DEG10320263; DEG10130497; DEG10120183; DEG10140017;
/gene_family="819" /family_size="39"	13	DEG10150086; DEG10220288; DEG10130475; DEG10240247; DEG10270599; DEG10100536; DEG10080148;DEG10280044; DEG10020023; DEG10010005; DEG10070111; DEG10310139; DEG10250668;
/gene_family="203" /family_size="39"	20	DEG10130372; DEG10140191; DEG10240145; DEG10160236; DEG10170305; DEG10190193; DEG10290340;DEG10020247; DEG10180480; DEG10200176; DEG10320257; DEG10120288; DEG10050526; DEG10010065;DEG10220338; DEG10060338; DEG10030118; DEG10340424; DEG10330239; DEG10250672;
/gene_family="1051" /family_size="39"	1	DEG10080196;
/gene_family="1607" /family_size="39"	1	DEG10080070;
/gene_family="145" /family_size="39"	1	DEG10310143;
/gene_family="719" /family_size="39"	1	DEG10080231;
/gene_family="1008" /family_size="39"	1	DEG10080092;
/gene_family="1471" /family_size="39"	3	DEG10250269; DEG10100228; DEG10080303;
/gene_family="1347" /family_size="39"	5	DEG10280136; DEG10130269; DEG10050038; DEG10270070; DEG10050056;
/gene_family="337" /family_size="39"	1	DEG10080230;
/gene_family="551" /family_size="39"	4	DEG10280238; DEG10170198; DEG10310042; DEG10240135;
/gene_family="1124" /family_size="39"	24	DEG10170047; DEG10150034; DEG10080219; DEG10010031; DEG10280186; DEG10110191; DEG10130145;DEG10220423; DEG10340484; DEG10140161; DEG10290029; DEG10320292; DEG10030060; DEG10240338;DEG10120050; DEG10060070; DEG10330301; DEG10160297; DEG10210199; DEG10100098; DEG10050189;DEG10200382; DEG10190232; DEG10020050;
/gene_family="928" /family_size="39"	2	DEG10260073; DEG10270138;
/gene_family="997" /family_size="39"	44	DEG10230041; DEG10160082; DEG10230108; DEG10270474; DEG10160197; DEG10150090; DEG10290095;DEG10060025; DEG10100563; DEG10010153; DEG10180315; DEG10330200; DEG10120021; DEG10020181;DEG10270631; DEG10110114; DEG10280009; DEG10320174; DEG10320231; DEG10330084; DEG10140128;DEG10240217; DEG10130100; DEG10030140; DEG10250697; DEG10030238; DEG10010018; DEG10170227;DEG10170035; DEG10290234; DEG10340280; …
/gene_family="1685" /family_size="39"	1	DEG10080225;
/gene_family="795" /family_size="39"	1	DEG10080124;
/gene_family="1037" /family_size="39"	2	DEG10310137; DEG10080296;
/gene_family="931" /family_size="39"	22	DEG10030597; DEG10150139; DEG10060166; DEG10010205; DEG10220199; DEG10020189; DEG10340214;DEG10200122; DEG10190119; DEG10130384; DEG10080019; DEG10170244; DEG10320130; DEG10160096;DEG10290213; DEG10050475; DEG10120267; DEG10140094; DEG10210134; DEG10250343; DEG10180287;DEG10330098;
/gene_family="434" /family_size="39"	12	DEG10200312; DEG10080001; DEG10130388; DEG10340139; DEG10240070; DEG10030121; DEG10100564;DEG10230294; DEG10250699; DEG10270632; DEG10280289; DEG10290089;
/gene_family="726" /family_size="39"	1	DEG10080312;
/gene_family="159" /family_size="39"	22	DEG10030155; DEG10170009; DEG10200470; DEG10340401; DEG10010263; DEG10280376; DEG10250167;DEG10270578; DEG10280043; DEG10210141; DEG10200371; DEG10230052; DEG10050626; DEG10230116;DEG10250641; DEG10310158; DEG10270162; DEG10100160; DEG10340267; DEG10070064; DEG10200364;DEG10030698;
/gene_family="1094" /family_size="39"	2	DEG10080170; DEG10050494;
/gene_family="168" /family_size="39"	14	DEG10200179; DEG10150056; DEG10070200; DEG10050317; DEG10330290; DEG10070219; DEG10230103;DEG10310150; DEG10100573; DEG10160286; DEG10270638; DEG10060094; DEG10260045; DEG10250709;
/gene_family="751" /family_size="39"	3	DEG10200393; DEG10150233; DEG10030352;
/gene_family="100" /family_size="39"	5	DEG10270308; DEG10250331; DEG10130103; DEG10050520; DEG10100269;
/gene_family="669" /family_size="39"	100	DEG10030734; DEG10100216; DEG10340077; DEG10330114; DEG10330295; DEG10180114; DEG10280312;DEG10050394; DEG10020083; DEG10050540; DEG10220139; DEG10270222; DEG10250225; DEG10080054;DEG10130324; DEG10120209; DEG10150123; DEG10180246; DEG10300009; DEG10050262; DEG10260086;DEG10180475; DEG10100446; DEG10050060; DEG10320118; DEG10030320; DEG10290200; DEG10060049;DEG10250613; DEG10270176; DEG10210103; …
/gene_family="396" /family_size="39"	6	DEG10320151; DEG10110134; DEG10180115; DEG10110116; DEG10180133; DEG10080217;
/gene_family="1199" /family_size="39"	4	DEG10310202; DEG10240094; DEG10200276; DEG10120374;
/gene_family="304" /family_size="39"	2	DEG10050120; DEG10080114;
/gene_family="1268" /family_size="39"	30	DEG10190182; DEG10150286; DEG10130313; DEG10010137; DEG10200009; DEG10100449; DEG10160222;DEG10050236; DEG10280414; DEG10330225; DEG10340049; DEG10110170; DEG10260053; DEG10170166;DEG10240293; DEG10270506; DEG10220060; DEG10060114; DEG10120365; DEG10130059; DEG10230195;DEG10220276; DEG10180471; DEG10020137; DEG10140071; DEG10290114; DEG10020174; DEG10030135;DEG10250549; DEG10320249;
/gene_family="824" /family_size="39"	8	DEG10200428; DEG10240374; DEG10290182; DEG10130346; DEG10250041; DEG10230177; DEG10280154;DEG10150206;
/gene_family="1615" /family_size="39"	6	DEG10170162; DEG10020135; DEG10010135; DEG10060022; DEG10210192; DEG10140265;
/gene_family="1257" /family_size="39"	25	DEG10290151; DEG10010130; DEG10120042; DEG10330035; DEG10340422; DEG10210206; DEG10140201;DEG10230260; DEG10320034; DEG10110016; DEG10240235; DEG10270520; DEG10060352; DEG10130264;DEG10220336; DEG10310156; DEG10100459; DEG10030449; DEG10160034; DEG10190029; DEG10020132;DEG10200262; DEG10250561; DEG10180040; DEG10170156;
/gene_family="841" /family_size="39"	10	DEG10220004; DEG10060099; DEG10030730; DEG10010202; DEG10150321; DEG10180400; DEG10130381;DEG10110205; DEG10290070; DEG10170122;
/gene_family="890" /family_size="39"	44	DEG10340132; DEG10160089; DEG10230286; DEG10340070; DEG10210114; DEG10010242; DEG10100500;DEG10050564; DEG10170297; DEG10060216; DEG10250614; DEG10130286; DEG10200238; DEG10220263;DEG10320232; DEG10330201; DEG10070056; DEG10140028; DEG10170071; DEG10070038; DEG10020065;DEG10150279; DEG10100198; DEG10270559; DEG10120325; DEG10110165; DEG10230217; DEG10020235;DEG10010255; DEG10270231; DEG10120035; …
/gene_family="571" /family_size="39"	5	DEG10310189; DEG10340024; DEG10240037; DEG10220449; DEG10200324;
/gene_family="52" /family_size="50"	1	DEG10050380;
/gene_family="644" /family_size="39"	27	DEG10130431; DEG10280182; DEG10060123; DEG10310223; DEG10030536; DEG10010036; DEG10080262;DEG10160301; DEG10190228; DEG10340480; DEG10180505; DEG10330305; DEG10140240; DEG10250136;DEG10240335; DEG10120054; DEG10230152; DEG10110188; DEG10200136; DEG10020277; DEG10210011;DEG10270125; DEG10220419; DEG10320288; DEG10100104; DEG10290033; DEG10170333;
/gene_family="1193" /family_size="39"	20	DEG10080261; DEG10120058; DEG10020273; DEG10290037; DEG10010040; DEG10190224; DEG10160305;DEG10170329; DEG10060127; DEG10330309; DEG10210015; DEG10140236; DEG10200140; DEG10150037;DEG10050270; DEG10030532; DEG10250138; DEG10320284; DEG10100108; DEG10130427;
/gene_family="185" /family_size="39"	15	DEG10100275; DEG10200437; DEG10330136; DEG10030375; DEG10130272; DEG10340147; DEG10290226;DEG10310113; DEG10320095; DEG10160134; DEG10250339; DEG10190076; DEG10240184; DEG10050436;DEG10210121;
/gene_family="300" /family_size="39"	24	DEG10120312; DEG10120314; DEG10080030; DEG10030438; DEG10220443; DEG10190039; DEG10190037;DEG10160044; DEG10050331; DEG10160042; DEG10200252; DEG10330045; DEG10330043; DEG10200254;DEG10290161; DEG10340129; DEG10150102; DEG10030440; DEG10080273; DEG10240245; DEG10320043;DEG10320041; DEG10180048; DEG10110021;
/gene_family="869" /family_size="39"	51	DEG10170044; DEG10030051; DEG10030052; DEG10070226; DEG10170045; DEG10210033; DEG10120335;DEG10120334; DEG10240341; DEG10240340; DEG10180572; DEG10150033; DEG10100093; DEG10220327;DEG10220328; DEG10110213; DEG10110212; DEG10330262; DEG10330261; DEG10270117; DEG10270116;DEG10140206; DEG10020047; DEG10290027; DEG10290026; DEG10310056; DEG10200084; DEG10200085;DEG10060280; DEG10060281; DEG10050165; …
/gene_family="1479" /family_size="39"	6	DEG10300089; DEG10270452; DEG10070192; DEG10100397; DEG10110034; DEG10250482;
/gene_family="1115" /family_size="39"	1	DEG10080093;
/gene_family="437" /family_size="39"	1	DEG10080202;
/gene_family="747" /family_size="39"	14	DEG10060168; DEG10250458; DEG10220371; DEG10100040; DEG10170213; DEG10100375; DEG10250062;DEG10240158; DEG10020172; DEG10210187; DEG10290097; DEG10060011; DEG10140291; DEG10310159;
/gene_family="908" /family_size="39"	1	DEG10050266;
/gene_family="378" /family_size="39"	1	DEG10080063;
/gene_family="485" /family_size="39"	20	DEG10130242; DEG10100558; DEG10160190; DEG10250690; DEG10220003; DEG10240252; DEG10320225;DEG10200225; DEG10010019; DEG10050220; DEG10290294; DEG10190162; DEG10280037; DEG10030104;DEG10330193; DEG10180423; DEG10310205; DEG10120249; DEG10010020; DEG10340419;
/gene_family="603" /family_size="39"	41	DEG10050487; DEG10030209; DEG10270537; DEG10230162; DEG10220100; DEG10340318; DEG10050111;DEG10180117; DEG10150119; DEG10280365; DEG10220425; DEG10320075; DEG10210203; DEG10150191;DEG10160067; DEG10190138; DEG10160144; DEG10020041; DEG10070232; DEG10140266; DEG10130461;DEG10330147; DEG10100479; DEG10290169; DEG10170036; DEG10330068; DEG10120137; DEG10320192;DEG10120039; DEG10060373; DEG10030428; …
/gene_family="264" /family_size="39"	1	DEG10050614;
/gene_family="247" /family_size="39"	1	DEG10080046;
/gene_family="559" /family_size="39"	2	DEG10170233; DEG10080186;
/gene_family="1356" /family_size="39"	11	DEG10200202; DEG10130389; DEG10340266; DEG10240159; DEG10100354; DEG10080185; DEG10230031;DEG10280347; DEG10270402; DEG10250441; DEG10030122;
/gene_family="916" /family_size="39"	29	DEG10160165; DEG10050523; DEG10190188; DEG10080038; DEG10100081; DEG10080157; DEG10010157;DEG10050319; DEG10330168; DEG10010171; DEG10280004; DEG10030186; DEG10180081; DEG10190053;DEG10290145; DEG10240119; DEG10130365; DEG10310211; DEG10100535; DEG10180474; DEG10160231;DEG10270106; DEG10330234; DEG10250116; DEG10320253; DEG10200307; DEG10290321; DEG10200303;DEG10030075;
/gene_family="178" /family_size="39"	1	DEG10260005;
/gene_family="731" /family_size="39"	4	DEG10280040; DEG10100335; DEG10250419; DEG10270385;
/gene_family="1267" /family_size="39"	1	DEG10180161;
/gene_family="1424" /family_size="39"	34	DEG10030559; DEG10200418; DEG10310006; DEG10060328; DEG10150334; DEG10200416; DEG10080206;DEG10120357; DEG10120359; DEG10210080; DEG10130026; DEG10290397; DEG10290395; DEG10130028;DEG10250245; DEG10140165; DEG10280104; DEG10280102; DEG10250243; DEG10100207; DEG10240356;DEG10100205; DEG10240358; DEG10060330; DEG10270239; DEG10030561; DEG10070182; DEG10270237;DEG10070184; DEG10140095; DEG10140097; …
/gene_family="958" /family_size="39"	2	DEG10290249; DEG10180142;
/gene_family="847" /family_size="39"	27	DEG10240324; DEG10170319; DEG10130417; DEG10010050; DEG10230148; DEG10020263; DEG10120068;DEG10250143; DEG10220406; DEG10210022; DEG10270131; DEG10140226; DEG10320274; DEG10280168;DEG10100117; DEG10150046; DEG10290047; DEG10060137; DEG10050280; DEG10180496; DEG10030522;DEG10110184; DEG10340466; DEG10160315; DEG10200150; DEG10190214; DEG10330319;
/gene_family="727" /family_size="39"	23	DEG10010039; DEG10060126; DEG10150036; DEG10030533; DEG10210014; DEG10160304; DEG10180502;DEG10190225; DEG10330308; DEG10240332; DEG10120057; DEG10130428; DEG10050269; DEG10020274;DEG10220416; DEG10340477; DEG10200139; DEG10290036; DEG10100107; DEG10140237; DEG10170330;DEG10280179; DEG10320285;
/gene_family="312" /family_size="39"	1	DEG10080068;
/gene_family="488" /family_size="39"	100	DEG10030734; DEG10340077; DEG10330114; DEG10330295; DEG10100381; DEG10100446; DEG10020083;DEG10050540; DEG10050542; DEG10220139; DEG10270222; DEG10250225; DEG10130324; DEG10120209;DEG10150123; DEG10180246; DEG10280312; DEG10050262; DEG10260086; DEG10050394; DEG10050060;DEG10320118; DEG10030320; DEG10290200; DEG10060049; DEG10250613; DEG10270176; DEG10210103;DEG10200045; DEG10140106; DEG10320297; …
/gene_family="535" /family_size="39"	1	DEG10220222;
/gene_family="158" /family_size="39"	3	DEG10330289; DEG10050401; DEG10160285;
/gene_family="262" /family_size="39"	5	DEG10270203; DEG10250165; DEG10130349; DEG10280364; DEG10240376;
/gene_family="422" /family_size="39"	7	DEG10190187; DEG10160230; DEG10320252; DEG10330233; DEG10120165; DEG10030076; DEG10290320;
/gene_family="1280" /family_size="39"	1	DEG10080084;
/gene_family="1095" /family_size="39"	12	DEG10060343; DEG10070034; DEG10170169; DEG10060111; DEG10020093; DEG10170110; DEG10010095;DEG10210042; DEG10020140; DEG10140275; DEG10140276; DEG10070004;
/gene_family="223" /family_size="39"	6	DEG10160164; DEG10140200; DEG10340278; DEG10220133; DEG10060202; DEG10330167;
/gene_family="432" /family_size="39"	3	DEG10080005; DEG10250698; DEG10220250;
/gene_family="1529" /family_size="39"	3	DEG10280385; DEG10230020; DEG10340198;
/gene_family="65" /family_size="39"	1	DEG10080160;
/gene_family="1211" /family_size="39"	18	DEG10070195; DEG10120349; DEG10050225; DEG10230264; DEG10060350; DEG10100234; DEG10220136;DEG10210091; DEG10170079; DEG10270263; DEG10130057; DEG10250276; DEG10340409; DEG10020072;DEG10240085; DEG10140169; DEG10010239; DEG10200247;
/gene_family="1247" /family_size="39"	6	DEG10180472; DEG10150287; DEG10160224; DEG10330227; DEG10290112; DEG10030133;
/gene_family="921" /family_size="39"	1	DEG10110109;
/gene_family="384" /family_size="39"	26	DEG10240144; DEG10050527; DEG10100544; DEG10130371; DEG10340425; DEG10250673; DEG10320258;DEG10080010; DEG10020248; DEG10330240; DEG10310194; DEG10290341; DEG10150258; DEG10180481;DEG10190194; DEG10170306; DEG10280497; DEG10010064; DEG10220339; DEG10120287; DEG10060339;DEG10160237; DEG10210189; DEG10200175; DEG10030117; DEG10140190;
/gene_family="810" /family_size="39"	4	DEG10180050; DEG10290163; DEG10030436; DEG10050385;
/gene_family="904" /family_size="39"	25	DEG10130358; DEG10240028; DEG10120234; DEG10150283; DEG10060065; DEG10170029; DEG10050135;DEG10010014; DEG10280188; DEG10080301; DEG10140309; DEG10210003; DEG10290108; DEG10310030;DEG10100153; DEG10250188; DEG10340166; DEG10270186; DEG10180202; DEG10320166; DEG10220046;DEG10190100; DEG10020035; DEG10070002; DEG10200078;
/gene_family="151" /family_size="39"	10	DEG10100199; DEG10180206; DEG10250237; DEG10190106; DEG10130249; DEG10270232; DEG10050563;DEG10110104; DEG10050430; DEG10290325;
/gene_family="690" /family_size="39"	2	DEG10250117; DEG10080155;
/gene_family="811" /family_size="39"	4	DEG10080279; DEG10070215; DEG10050461; DEG10300043;
/gene_family="167" /family_size="39"	3	DEG10140253; DEG10030221; DEG10060036;
/gene_family="707" /family_size="39"	1	DEG10310089;
/gene_family="1346" /family_size="39"	23	DEG10240109; DEG10030195; DEG10330156; DEG10280456; DEG10230208; DEG10130041; DEG10070057;DEG10100326; DEG10030480; DEG10170115; DEG10160153; DEG10150252; DEG10310133; DEG10270377;DEG10180108; DEG10320067; DEG10200346; DEG10210137; DEG10190061; DEG10010098; DEG10280078;DEG10070041; DEG10250408;
/gene_family="752" /family_size="39"	19	DEG10050096; DEG10320216; DEG10170148; DEG10190157; DEG10010124; DEG10150088; DEG10020125;DEG10130449; DEG10120330; DEG10030110; DEG10210127; DEG10180406; DEG10330184; DEG10310092;DEG10240189; DEG10290134; DEG10340315; DEG10160182; DEG10140174;
/gene_family="839" /family_size="80"	1	DEG10080049;
/gene_family="696" /family_size="40"	7	DEG10290358; DEG10260033; DEG10300077; DEG10340373; DEG10340112; DEG10230271; DEG10300022;
/gene_family="1304" /family_size="39"	8	DEG10080270; DEG10150297; DEG10330343; DEG10160338; DEG10120120; DEG10320343; DEG10130488;DEG10190287;
/gene_family="1004" /family_size="39"	1	DEG10080146;
/gene_family="80" /family_size="39"	8	DEG10180553; DEG10290376; DEG10010231; DEG10050253; DEG10330252; DEG10160249; DEG10340314;DEG10130331;
/gene_family="1236" /family_size="39"	26	DEG10340057; DEG10290360; DEG10030475; DEG10070204; DEG10310088; DEG10140186; DEG10230203;DEG10160021; DEG10190018; DEG10110013; DEG10200339; DEG10100322; DEG10210062; DEG10330022;DEG10240115; DEG10050413; DEG10120032; DEG10010109; DEG10080167; DEG10180024; DEG10280449;DEG10130478; DEG10250404; DEG10020110; DEG10320022; DEG10170131;
/gene_family="1729" /family_size="39"	1	DEG10310099;
/gene_family="813" /family_size="39"	1	DEG10070163;
/gene_family="897" /family_size="39"	1	DEG10340206;
/gene_family="1006" /family_size="39"	5	DEG10050540; DEG10330160; DEG10130155; DEG10160157; DEG10140075;
/gene_family="549" /family_size="40"	2	DEG10280082; DEG10220303;
/gene_family="895" /family_size="39"	25	DEG10240325; DEG10130418; DEG10180497; DEG10120067; DEG10050279; DEG10020264; DEG10290046;DEG10250142; DEG10220407; DEG10210021; DEG10270130; DEG10140227; DEG10280169; DEG10320275;DEG10100116; DEG10200149; DEG10010049; DEG10170320; DEG10060136; DEG10340467; DEG10310217;DEG10030523; DEG10160314; DEG10190215; DEG10330318;
/gene_family="334" /family_size="39"	1	DEG10260019;
/gene_family="771" /family_size="39"	1	DEG10180555;
/gene_family="1322" /family_size="39"	8	DEG10030054; DEG10130037; DEG10010238; DEG10170080; DEG10120158; DEG10140170; DEG10060349;DEG10290012;
/gene_family="474" /family_size="39"	1	DEG10120379;
/gene_family="947" /family_size="39"	5	DEG10130343; DEG10100221; DEG10240302; DEG10280051; DEG10250259;
/gene_family="874" /family_size="39"	4	DEG10280143; DEG10070018; DEG10080132; DEG10210183;
/gene_family="242" /family_size="39"	25	DEG10140202; DEG10290150; DEG10120041; DEG10100460; DEG10330034; DEG10030450; DEG10340423;DEG10210207; DEG10180039; DEG10320033; DEG10050330; DEG10240234; DEG10060052; DEG10010129;DEG10130265; DEG10220337; DEG10080317; DEG10230259; DEG10190028; DEG10160033; DEG10020131;DEG10200263; DEG10150094; DEG10250562; DEG10170155;
/gene_family="44" /family_size="39"	4	DEG10220031; DEG10290316; DEG10270183; DEG10310225;
/gene_family="1325" /family_size="39"	100	DEG10030734; DEG10130213; DEG10340077; DEG10330114; DEG10060061; DEG10330295; DEG10100381;DEG10100446; DEG10020083; DEG10220139; DEG10270222; DEG10250225; DEG10080054; DEG10130324;DEG10300045; DEG10060062; DEG10150123; DEG10180246; DEG10300009; DEG10050262; DEG10260086;DEG10050394; DEG10050060; DEG10320118; DEG10030320; DEG10330135; DEG10290200; DEG10060049;DEG10250613; DEG10270176; DEG10210103; …
/gene_family="1401" /family_size="39"	20	DEG10290156; DEG10030444; DEG10330038; DEG10150099; DEG10120317; DEG10050291; DEG10340372;DEG10010133; DEG10240240; DEG10190032; DEG10320037; DEG10310179; DEG10160037; DEG10270516;DEG10180043; DEG10250557; DEG10220234; DEG10200257; DEG10280065; DEG10130200;
/gene_family="574" /family_size="39"	13	DEG10170172; DEG10130294; DEG10250439; DEG10100352; DEG10270513; DEG10150318; DEG10050312;DEG10280527; DEG10110208; DEG10270400; DEG10300007; DEG10240208; DEG10200286;
/gene_family="400" /family_size="39"	1	DEG10080127;
/gene_family="1059" /family_size="39"	4	DEG10110035; DEG10260003; DEG10240285; DEG10300033;
/gene_family="160" /family_size="39"	14	DEG10130444; DEG10220272; DEG10100481; DEG10220111; DEG10030715; DEG10120281; DEG10340031;DEG10050155; DEG10050562; DEG10250587; DEG10050037; DEG10020204; DEG10180170; DEG10030405;
/gene_family="1290" /family_size="39"	2	DEG10080237; DEG10310076;
/gene_family="107" /family_size="39"	2	DEG10220273; DEG10240143;
/gene_family="1053" /family_size="39"	20	DEG10170023; DEG10210152; DEG10030389; DEG10200229; DEG10150132; DEG10290245; DEG10240255;DEG10050151; DEG10330117; DEG10320115; DEG10060005; DEG10010008; DEG10160115; DEG10180181;DEG10190091; DEG10280072; DEG10120345; DEG10020028; DEG10140020; DEG10110074;
/gene_family="1152" /family_size="39"	1	DEG10050342;
/gene_family="1437" /family_size="39"	4	DEG10010142; DEG10080128; DEG10220323; DEG10060105;
/gene_family="467" /family_size="39"	17	DEG10340488; DEG10230158; DEG10170041; DEG10120338; DEG10060064; DEG10240344; DEG10030048;DEG10150031; DEG10290023; DEG10250124; DEG10210147; DEG10020044; DEG10220331; DEG10130049;DEG10280261; DEG10140007; DEG10010025;
/gene_family="1217" /family_size="39"	44	DEG10340132; DEG10160089; DEG10230286; DEG10340070; DEG10210114; DEG10010242; DEG10100500;DEG10050564; DEG10270559; DEG10170297; DEG10250614; DEG10130286; DEG10200238; DEG10220263;DEG10320232; DEG10060216; DEG10330201; DEG10070056; DEG10140028; DEG10170071; DEG10070038;DEG10020065; DEG10150279; DEG10100198; DEG10120325; DEG10290326; DEG10230217; DEG10020235;DEG10010255; DEG10270231; DEG10120035; …
/gene_family="1231" /family_size="39"	21	DEG10050410; DEG10340090; DEG10200342; DEG10130481; DEG10300078; DEG10240112; DEG10080120;DEG10030702; DEG10070207; DEG10020230; DEG10120029; DEG10270533; DEG10220150; DEG10250580;DEG10110011; DEG10180021; DEG10210066; DEG10100476; DEG10230233; DEG10010069; DEG10170292;
/gene_family="1491" /family_size="39"	2	DEG10080113; DEG10310128;
/gene_family="60" /family_size="39"	14	DEG10250458; DEG10250062; DEG10100040; DEG10170213; DEG10100375; DEG10060168; DEG10240158;DEG10310159; DEG10020172; DEG10210187; DEG10290097; DEG10060011; DEG10140291; DEG10220371;
/gene_family="1212" /family_size="39"	18	DEG10100608; DEG10070190; DEG10210108; DEG10340369; DEG10180455; DEG10160212; DEG10220173;DEG10190177; DEG10130266; DEG10270680; DEG10320244; DEG10110168; DEG10330215; DEG10050575;DEG10250763; DEG10170191; DEG10010155; DEG10230097;
/gene_family="689" /family_size="39"	26	DEG10190185; DEG10170235; DEG10240122; DEG10210085; DEG10020183; DEG10200048; DEG10160228;DEG10140057; DEG10250476; DEG10110174; DEG10280434; DEG10070058; DEG10060316; DEG10270446;DEG10130308; DEG10120388; DEG10290318; DEG10220166; DEG10180201; DEG10180473; DEG10100391;DEG10020018; DEG10330231; DEG10070001; DEG10010194; DEG10140136;
/gene_family="409" /family_size="39"	16	DEG10100065; DEG10180552; DEG10160250; DEG10200020; DEG10150323; DEG10290377; DEG10330253;DEG10270091; DEG10310070; DEG10190264; DEG10020188; DEG10120023; DEG10240073; DEG10250100;DEG10320316; DEG10080037;
/gene_family="1354" /family_size="39"	29	DEG10130096; DEG10170194; DEG10060007; DEG10280349; DEG10050356; DEG10060268; DEG10240278;DEG10160061; DEG10220019; DEG10070211; DEG10140009; DEG10170349; DEG10020161; DEG10140023;DEG10320198; DEG10330062; DEG10290279; DEG10010162; DEG10340439; DEG10120110; DEG10100299;DEG10150084; DEG10230250; DEG10250362; DEG10190143; DEG10200205; DEG10180380; DEG10210158;DEG10110143;
/gene_family="206" /family_size="39"	1	DEG10030235;
/gene_family="1321" /family_size="39"	1	DEG10050640;
/gene_family="1333" /family_size="39"	5	DEG10260011; DEG10200439; DEG10310115; DEG10320092; DEG10250635;
/gene_family="1139" /family_size="39"	6	DEG10330029; DEG10190022; DEG10180031; DEG10280035; DEG10160028; DEG10320028;
/gene_family="893" /family_size="39"	26	DEG10290155; DEG10340119; DEG10270517; DEG10130199; DEG10120046; DEG10010132; DEG10110019;DEG10320039; DEG10150098; DEG10190034; DEG10200258; DEG10250558; DEG10020133; DEG10280064;DEG10330040; DEG10170160; DEG10030445; DEG10100456; DEG10210194; DEG10220006; DEG10230276;DEG10240239; DEG10160039; DEG10140177; DEG10310180; DEG10180045;
/gene_family="187" /family_size="39"	21	DEG10100464; DEG10320214; DEG10130447; DEG10120328; DEG10270523; DEG10240191; DEG10160180;DEG10070040; DEG10010125; DEG10210126; DEG10020126; DEG10330182; DEG10060361; DEG10030112;DEG10140173; DEG10190156; DEG10180404; DEG10110150; DEG10290136; DEG10170150; DEG10250565;
/gene_family="1635" /family_size="39"	15	DEG10130268; DEG10200459; DEG10170147; DEG10290384; DEG10110193; DEG10020124; DEG10330294;DEG10160290; DEG10050261; DEG10180523; DEG10030018; DEG10320298; DEG10190240; DEG10140264;DEG10030109;
/gene_family="368" /family_size="39"	1	DEG10080286;
/gene_family="109" /family_size="39"	1	DEG10100454;
/gene_family="57" /family_size="39"	2	DEG10080229; DEG10310074;
/gene_family="1410" /family_size="39"	6	DEG10280483; DEG10270139; DEG10250150; DEG10130170; DEG10020220; DEG10120385;
/gene_family="1629" /family_size="39"	12	DEG10050040; DEG10270648; DEG10130174; DEG10030465; DEG10290290; DEG10280491; DEG10200111;DEG10240225; DEG10250720; DEG10100583; DEG10080227; DEG10220008;
/gene_family="980" /family_size="39"	5	DEG10300063; DEG10200411; DEG10050039; DEG10280192; DEG10240269;
/gene_family="359" /family_size="39"	24	DEG10100277; DEG10060164; DEG10010207; DEG10220197; DEG10080017; DEG10280284; DEG10200124;DEG10340212; DEG10130386; DEG10070155; DEG10170246; DEG10160094; DEG10290211; DEG10230016;DEG10050473; DEG10120269; DEG10020191; DEG10190120; DEG10140092; DEG10210135; DEG10330096;DEG10180288; DEG10250342; DEG10320128;
/gene_family="812" /family_size="39"	5	DEG10200239; DEG10290076; DEG10240052; DEG10310167; DEG10050029;
/gene_family="527" /family_size="39"	1	DEG10050580;
/gene_family="180" /family_size="39"	2	DEG10080158; DEG10080159;
/gene_family="512" /family_size="40"	15	DEG10060176; DEG10050080; DEG10050199; DEG10340089; DEG10080162; DEG10260015; DEG10050020;DEG10080123; DEG10050140; DEG10250308; DEG10180402; DEG10270289; DEG10180012; DEG10140111;DEG10220151;
/gene_family="1137" /family_size="39"	26	DEG10120049; DEG10170046; DEG10060069; DEG10030059; DEG10280187; DEG10010030; DEG10080220;DEG10220424; DEG10270118; DEG10130144; DEG10050190; DEG10340485; DEG10140162; DEG10310057;DEG10330300; DEG10020049; DEG10320293; DEG10240339; DEG10100097; DEG10160296; DEG10290028;DEG10210200; DEG10200383; DEG10190233; DEG10250131; DEG10180510;
/gene_family="520" /family_size="39"	9	DEG10010234; DEG10080067; DEG10340054; DEG10230199; DEG10020079; DEG10170086; DEG10120177;DEG10220155; DEG10280316;
/gene_family="668" /family_size="39"	6	DEG10310012; DEG10120127; DEG10320030; DEG10180035; DEG10140253; DEG10290125;
/gene_family="397" /family_size="39"	5	DEG10250605; DEG10130489; DEG10100495; DEG10300087; DEG10280096;
/gene_family="453" /family_size="39"	2	DEG10080139; DEG10180001;
/gene_family="1593" /family_size="39"	45	DEG10330070; DEG10100377; DEG10270429; DEG10200466; DEG10270469; DEG10210180; DEG10250495;DEG10270361; DEG10270320; DEG10190137; DEG10130143; DEG10160068; DEG10270207; DEG10290272;DEG10110135; DEG10220368; DEG10100406; DEG10100287; DEG10200212; DEG10250351; DEG10250350;DEG10170099; DEG10100288; DEG10100360; DEG10100361; DEG10120300; DEG10100599; DEG10320191;DEG10270407; DEG10180363; DEG10340029; …
/gene_family="1425" /family_size="39"	3	DEG10140244; DEG10020092; DEG10060348;
/gene_family="388" /family_size="39"	2	DEG10180320; DEG10290196;
/gene_family="1350" /family_size="39"	8	DEG10180348; DEG10060060; DEG10270644; DEG10080053; DEG10180255; DEG10070104; DEG10140105;DEG10180213;
/gene_family="1044" /family_size="39"	5	DEG10120264; DEG10140088; DEG10060312; DEG10020300; DEG10170348;
/gene_family="1556" /family_size="39"	4	DEG10220077; DEG10080094; DEG10250500; DEG10290246;
