# Supplementary material for: Pan-Genome Analysis of Human Gastric Pathogen H. pylori: Comparative Genomics and Pathogenomics Approaches to Identify Regions Associated with Pathogenicity and Prediction of Potential Core Therapeutic Targets
Source: Biomed Res Int. 2015 Jan 29;2015:139580. doi: 10.1155/2015/139580 (PMC4325212; doi:10.1155/2015/139580)
Supplement: Supplementary file 1 — The supplementary data provides insight view to results originally extracted from different tools and databases. Because of availability of large dataset it was not possible to incorporate all of it the article. You can access the additional files having the composition of core genome families of all 1193 genomes (Additional file 1). Additional file 2 contains BLAST data extracted from DEG, number of homologs along with their AC number against all query proteins. Additional file 3 contains BLAST result of gene families against Human genome to find non-human homologs. Protein sequence of all gene families has been provided in Additional file 4. Additional file 5 gives a comprehensive view of all predicted epitopes along with their location and their predictions as antigenic or not. [file 139580.f1.zip › supplementary material/Additional file 3.xlsx]

## Sheet: VGD7KRNP014-Alignment-HitTable
query id,	subject ids,	% identity,	E-value of best hit	HOMOLOG
/gene_family="566"	gi|4826730|ref|NP_004949.1|;gi|530360517|ref|XP_005263495.1|	37.14	0.064
/gene_family="489"	gi|40217847|ref|NP_054733.2|	29.76	1.1
/gene_family="1318"	gi|225543166|ref|NP_056195.3|	24.64	0.35
/gene_family="213"	gi|134268644|ref|NP_037421.2|	27.96	2.8
/gene_family="525"	gi|4504669|ref|NP_000580.1|	23.4	1.4
/gene_family="1613"	gi|578835539|ref|XP_006723683.1|;gi|578835541|ref|XP_006723684.1|	31.36	0.0001	NO
/gene_family="144"	gi|31581534|ref|NP_060116.2|	26.32	3e-18	NO
/gene_family="673"	gi|45580738|ref|NP_995583.1|	37.17	1e-36
/gene_family="692"	gi|94538322|ref|NP_005317.2|	26.9	6e-07	NO
/gene_family="680"	gi|578824412|ref|XP_006719738.1|	35.21	0.006
/gene_family="699"	gi|578798834|ref|XP_006710601.1|	27.14	1.3
/gene_family="1050"	gi|530370760|ref|XP_005246814.1|	29.63	1.2
/gene_family="1663"	gi|4758184|ref|NP_004403.1|	25.14	2e-07	NO
/gene_family="244"	gi|331284125|ref|NP_056224.3|	44.44	9.9
/gene_family="1295"	gi|530387309|ref|XP_005249621.1|	41.46	2.3
/gene_family="1092"	gi|27894376|ref|NP_006605.2|;gi|578805559|ref|XP_006713001.1|;gi|578805561|ref|XP_006713002.1|;gi|578805563|ref|XP_006713003.1|	30.77	6.2
/gene_family="1222"	gi|312836833|ref|NP_001186137.1|;gi|312836835|ref|NP_001186138.1|	29.52	1.1
/gene_family="263"	gi|5729820|ref|NP_006558.1|;gi|530381385|ref|XP_005248868.1|;gi|530381387|ref|XP_005248869.1|	29.93	3e-28	NO
/gene_family="1353"	gi|578798790|ref|XP_006710579.1|	25.33	3.2
/gene_family="282"	gi|530381044|ref|XP_005265966.1|	37.5	1.9
/gene_family="1072"	gi|4505771|ref|NP_000434.1|	35.19	7.1
/gene_family="357"	gi|38202255|ref|NP_689508.3|;gi|386642860|ref|NP_001245366.1|	38.01	7e-133
/gene_family="390"	gi|578838421|ref|XP_006724731.1|	56.52	9.7
/gene_family="1311"	gi|528524502|ref|NP_001268661.1|	34.21	7.1
/gene_family="1571"	gi|155030194|ref|NP_066982.3|	29.23	0.9
/gene_family="276"	gi|4506749|ref|NP_001024.1|	33.58	8e-118	NO
/gene_family="1075"	gi|118150656|ref|NP_062618.2|	33.9	2.5
/gene_family="1142"	gi|530378750|ref|XP_005248332.1|	28.85	2
/gene_family="258"	gi|62821796|ref|NP_001017361.1|	39.53	2.6
/gene_family="248"	gi|578803044|ref|XP_006712120.1|	30.14	0.1
/gene_family="1195"	gi|194248068|ref|NP_006763.2|	30.3	1
/gene_family="198"	gi|84508631|ref|NP_077733.3|	26.62	0.12
/gene_family="452"	gi|62988328|ref|NP_065070.1|	35.71	8.3
/gene_family="1309"	gi|578819844|ref|XP_006718061.1|	26.27	0.038
/gene_family="1452"	gi|4502183|ref|NP_001642.1|	30.38	0.12
/gene_family="174"	gi|4507215|ref|NP_003127.1|	31.25	7e-56	NO
/gene_family="222"	gi|578802182|ref|XP_006711817.1|;gi|578802184|ref|XP_006711818.1|	33.4	2e-74	NO
/gene_family="84"	gi|7662234|ref|NP_055515.1|	33.33	0.64
/gene_family="114"	gi|578813854|ref|XP_006715890.1|	35	0.45
/gene_family="1442"	gi|55749515|ref|NP_001007070.1|;gi|55749523|ref|NP_001007071.1|	25	0.93
/gene_family="446"	gi|530367447|ref|XP_005264304.1|	32.89	0.74
/gene_family="643"	gi|4502011|ref|NP_000467.1|	31.05	7e-25	NO
/gene_family="202"	gi|37693993|ref|NP_002504.2|	45.93	2e-38
/gene_family="1497"	gi|254911037|ref|NP_001155967.2|;gi|254911041|ref|NP_001155968.2|;gi|254911043|ref|NP_062542.5|	27.06	0.94
/gene_family="214"	gi|9910460|ref|NP_064587.1|	29.18	1e-28	NO
/gene_family="301"	gi|40385883|ref|NP_954699.1|	35.35	8e-38
/gene_family="823"	gi|499591687|ref|NP_001265098.1|	36.04	2e-75
/gene_family="1495"	gi|578818605|ref|XP_006717579.1|	24.4	5e-06	NO
/gene_family="197"	gi|530377549|ref|XP_005262984.1|;gi|578809038|ref|XP_006714245.1|	29.79	9e-08	NO
/gene_family="173"	gi|57770468|ref|NP_001009905.1|;gi|578831989|ref|XP_006722335.1|	25.56	4e-08	NO
/gene_family="1306"	gi|32307132|ref|NP_066923.3|	42.78	1e-97
/gene_family="540"	gi|7657339|ref|NP_055299.1|	37.84	1e-43
/gene_family="407"	gi|46255039|ref|NP_598193.2|	33.33	0.048
/gene_family="604"	gi|31083280|ref|NP_851307.1|	24.62	0.58
/gene_family="748"	gi|354983493|ref|NP_001238978.1|	27.51	2e-12	NO
/gene_family="9"	gi|71061468|ref|NP_001804.2|	27.27	0.44
/gene_family="639"	gi|38708321|ref|NP_060023.1|	32	6.5
/gene_family="47"	gi|530355401|ref|XP_005275754.1|;gi|530396101|ref|XP_005253332.1|;gi|530436734|ref|XP_005276450.1|	24.77	0.59
/gene_family="594"	gi|72534670|ref|NP_001026859.1|	26.92	0.79
/gene_family="268"	gi|165377209|ref|NP_001107000.1|	31.67	2e-38	NO
/gene_family="99"	gi|307133775|ref|NP_001182502.1|	25.69	0.34
/gene_family="1150"	gi|533869216|ref|NP_001269222.1|	34.92	4e-08	NO
/gene_family="541"	gi|4507521|ref|NP_001055.1|;gi|205277463|ref|NP_001128527.1|	24.76	2e-19	NO
/gene_family="373"	gi|81295809|ref|NP_006022.3|	33.33	1.7
/gene_family="476"	gi|578833410|ref|XP_006722869.1|	26.32	0.022
/gene_family="1472"	gi|7657339|ref|NP_055299.1|	27.5	1e-05	NO
/gene_family="1861"	gi|578836729|ref|XP_006724128.1|	31.43	2
/gene_family="161"	gi|312147315|ref|NP_001185879.1|	26.39	0.064
/gene_family="698"	gi|296010906|ref|NP_001171565.1|	32.37	1e-47	NO
/gene_family="949"	gi|578811654|ref|XP_006715146.1|	31.87	0.65
/gene_family="338"	gi|22748717|ref|NP_689541.1|	44.13	3e-115
/gene_family="923"	gi|104487295|ref|NP_570923.2|;gi|530425353|ref|XP_005259666.1|	25.66	0.45
/gene_family="1019"	gi|251831119|ref|YP_003024038.1|	36.41	3e-65
/gene_family="956"	gi|299473797|ref|NP_001177408.1|	34.48	0.54
/gene_family="335"	gi|635574573|ref|NP_001278977.1|	27.13	3.4
/gene_family="953"	gi|7706057|ref|NP_057588.1|	49.28	3e-13
/gene_family="495"	gi|23238219|ref|NP_008999.2|;gi|578836874|ref|XP_006724173.1|	26.19	4e-09	NO
/gene_family="1721"	gi|530386976|ref|XP_005250040.1|	39.29	5.3
/gene_family="30"	gi|530382109|ref|XP_005249218.1|	33.78	7e-30	NO
/gene_family="1376"	gi|194018542|ref|NP_001123482.1|	30.56	0.73
/gene_family="37"	gi|530377430|ref|XP_005262925.1|	32.67	4e-46	NO
/gene_family="854"	gi|27436901|ref|NP_002940.2|	29.77	1e-07	NO
/gene_family="964"	gi|118572611|ref|NP_002475.2|	26.39	1e-12	NO
/gene_family="162"	gi|119943100|ref|NP_000523.2|	27.59	0.0002	NO
/gene_family="32"	gi|31542947|ref|NP_002147.2|;gi|41399285|ref|NP_955472.1|;gi|530370277|ref|XP_005246575.1|	53.21	0
/gene_family="1240"	gi|34147630|ref|NP_003312.3|	57.29	1e-167
/gene_family="371"	gi|116734668|ref|NP_001068566.1|	20.9	0.007
/gene_family="1111"	gi|56699456|ref|NP_998760.1|	38.41	7e-19
/gene_family="449"	gi|153945836|ref|NP_001093591.1|	26.09	1.2
/gene_family="287"	gi|9961252|ref|NP_061338.1|	40.81	2e-45
/gene_family="924"	gi|530400334|ref|XP_005268969.1|	36.23	0.14
/gene_family="553"	gi|25306275|ref|NP_733935.1|;gi|578821681|ref|XP_006718729.1|	41.55	9e-28
/gene_family="871"	gi|108773782|ref|NP_002931.2|;gi|108773784|ref|NP_001035809.1|	36.59	0.034
/gene_family="1298"	gi|145309326|ref|NP_002284.3|	22.83	0.65
/gene_family="1073"	gi|530396822|ref|XP_005274072.1|	47.01	7e-31
/gene_family="1009"	gi|530386488|ref|XP_005250681.1|	27.27	6.5
/gene_family="22"	gi|530407272|ref|XP_005255034.1|	36.94	1e-13
/gene_family="240"	gi|530403147|ref|XP_005267413.1|	23.43	0.44
/gene_family="136"	gi|4826852|ref|NP_004994.1|	47.54	2e-12
/gene_family="674"	gi|11641243|ref|NP_071736.1|	35.54	8e-12
/gene_family="183"	gi|56118217|ref|NP_001008217.1|;gi|56237023|ref|NP_000394.2|;gi|189083684|ref|NP_001121093.1|	30.86	4e-47	NO
/gene_family="298"	gi|4502297|ref|NP_001678.1|;gi|50345991|ref|NP_001001975.1|	25.93	1.4
/gene_family="1436"	gi|16554611|ref|NP_112570.2|	29.63	8e-05	NO
/gene_family="1283"	gi|93277096|ref|NP_667338.3|	29	1
/gene_family="803"	gi|56605983|ref|NP_068596.2|;gi|215272360|ref|NP_001135827.1|	31.48	6e-07	NO
/gene_family="577"	gi|116812579|ref|NP_057140.2|	33.77	4e-15	NO
/gene_family="1135"	gi|4885079|ref|NP_005165.1|	31.17	2e-27	NO
/gene_family="81"	gi|4758786|ref|NP_004541.1|;gi|530364807|ref|XP_005245265.1|	41.87	3e-106
/gene_family="1029"	gi|14790190|ref|NP_055816.2|	35.29	0.79
/gene_family="1080"	gi|11968182|ref|NP_072045.1|	26.43	2e-09	NO
/gene_family="450"	gi|18390331|ref|NP_079272.4|	45.98	0
/gene_family="1525"	gi|14141193|ref|NP_001004.2|;gi|530416994|ref|XP_005259192.1|;gi|530416996|ref|XP_005259193.1|;gi|530431386|ref|XP_005277141.1|;gi|530431388|ref|XP_005277142.1|;gi|530431823|ref|XP_005277331.1|;gi|530431917|ref|XP_005277372.1|;gi|530431919|ref|XP_005277373.1|;gi|530433542|ref|XP_005278344.1|;gi|530433544|ref|XP_005278345.1|;gi|578841778|ref|XP_006725939.1|;gi|578841780|ref|XP_006725940.1|;gi|5788…	27.94	0.002	NO
/gene_family="710"	gi|84798622|ref|NP_005899.3|	24.43	0.11
/gene_family="111"	gi|4557335|ref|NP_000040.1|;gi|189339202|ref|NP_001121557.1|;gi|578829901|ref|XP_006721590.1|	37.5	3
/gene_family="1351"	gi|578820480|ref|XP_005252939.2|	34.15	3
/gene_family="1429"	gi|222537719|ref|NP_660275.2|	27.92	3e-08	NO
/gene_family="1520"	gi|261862348|ref|NP_001159829.1|;gi|261862350|ref|NP_001159830.1|;gi|261862352|ref|NP_001159831.1|	43.3	8e-104
/gene_family="344"	gi|5031777|ref|NP_005521.1|	32.31	1e-50	NO
/gene_family="23"	gi|4826742|ref|NP_005101.1|	31.45	9e-89	NO
/gene_family="125"	gi|40254834|ref|NP_006603.2|;gi|530409731|ref|XP_005256481.1|	40.74	4.4
/gene_family="224"	gi|530397933|ref|XP_005271532.1|	30.85	0.055
/gene_family="622"	gi|578806691|ref|XP_006713443.1|	23.39	1.5
/gene_family="618"	gi|7661872|ref|NP_056155.1|;gi|530372179|ref|XP_005265063.1|	32.8	3e-142	NO
/gene_family="945"	gi|188528628|ref|NP_149100.2|	33.33	2e-95	NO
/gene_family="552"	gi|239788483|ref|NP_001155091.1|	32.52	7e-30	NO
/gene_family="1063"	gi|11128019|ref|NP_061820.1|	30.53	0.046
/gene_family="493"	gi|13654276|ref|NP_112486.1|	40.4	5e-92
/gene_family="1673"	gi|39725942|ref|NP_068602.2|	23.45	7.7
/gene_family="1275"	gi|4507835|ref|NP_000364.1|	23.74	3e-07	NO
/gene_family="1149"	gi|153792144|ref|NP_525021.3|	33.78	6e-30	NO
/gene_family="723"	gi|87116668|ref|NP_001034568.1|	22.86	2
/gene_family="786"	gi|109148542|ref|NP_001596.2|	35.51	1e-155
/gene_family="816"	gi|31377548|ref|NP_775853.2|	24.53	4e-08	NO
/gene_family="96"	gi|385719196|ref|NP_001245322.1|	30.6	3e-35	NO
/gene_family="349"	gi|578807029|ref|XP_006713551.1|	29.17	3.4
/gene_family="1486"	gi|223718097|ref|NP_005006.3|	24.09	8e-10	NO
/gene_family="1252"	gi|87298935|ref|NP_078988.2|	24.64	5.8
/gene_family="1426"	gi|148491070|ref|NP_001896.2|;gi|530361940|ref|XP_005270593.1|;gi|578798477|ref|XP_006710453.1|;gi|578798479|ref|XP_006710454.1|	45.62	5e-159
/gene_family="1543"	gi|10834988|ref|NP_000600.1|	22.03	1.2
/gene_family="675"	gi|578804153|ref|XP_006712521.1|	25	4.4
/gene_family="117"	gi|50845418|ref|NP_065973.2|	31.91	2.5
/gene_family="228"	gi|126116596|ref|NP_060606.3|	25	2.1
/gene_family="992"	gi|578802946|ref|XP_005264429.2|	40	2
/gene_family="915"	gi|160358340|ref|NP_001104003.1|	26.32	10
/gene_family="336"	gi|16579888|ref|NP_000498.2|;gi|189083692|ref|NP_001121100.1|	30.43	8e-19	NO
/gene_family="1282"	gi|474451716|ref|NP_001264282.1|	25.29	8.9
/gene_family="165"	gi|15055539|ref|NP_002943.2|	30.82	1e-13	NO
/gene_family="45"	gi|32261309|ref|NP_072093.2|	30	5.5
/gene_family="1078"	gi|4826716|ref|NP_004946.1|;gi|118582260|ref|NP_001071642.1|;gi|118582262|ref|NP_001071643.1|;gi|118582265|ref|NP_001071644.1|;gi|118582267|ref|NP_001071645.1|;gi|530381521|ref|XP_005248935.1|;gi|530381523|ref|XP_005248936.1|;gi|530381525|ref|XP_005248937.1|;gi|530381527|ref|XP_005248938.1|;gi|530381529|ref|XP_005248939.1|	32.31	0.8
/gene_family="329"	gi|6005862|ref|NP_009139.1|	42.7	4e-12
/gene_family="1027"	gi|578799212|ref|XP_006710738.1|	35.82	0.28
/gene_family="217"	gi|578804071|ref|XP_006712483.1|	30.43	0.36
/gene_family="25"	gi|32189394|ref|NP_001677.2|	67.67	0
/gene_family="497"	gi|586798196|ref|NP_001276977.1|	28.21	3.2
/gene_family="863"	gi|530429786|ref|XP_005275697.1|	31.91	0.97
/gene_family="1645"	gi|126131104|ref|NP_733842.2|	23.7	1.7
/gene_family="948"	gi|115648022|ref|NP_003974.3|;gi|115648063|ref|NP_001070253.1|	22.16	2e-10	NO
/gene_family="1784"	gi|196123584|ref|YP_002124307.1|	27.08	0.022
/gene_family="1028"	gi|578805879|ref|XP_006713131.1|	25.94	2e-14	NO
/gene_family="1706"	gi|9506745|ref|NP_061822.1|	34.38	7.2
/gene_family="942"	gi|530394055|ref|XP_005270064.1|	31.37	8.9
/gene_family="1342"	gi|21361454|ref|NP_037460.2|	26.09	3e-15	NO
/gene_family="1271"	gi|45269149|ref|NP_055113.2|	31.02	2e-36	NO
/gene_family="713"	gi|22202611|ref|NP_001295.2|	31.73	0.95
/gene_family="609"	gi|556695367|ref|NP_001273336.1|	28.65	4e-18	NO
/gene_family="585"	gi|4506697|ref|NP_001014.1|	28	2e-09	NO
/gene_family="670"	gi|578817158|ref|XP_006717059.1|	43.59	0.82
/gene_family="1528"	gi|32189392|ref|NP_005800.3|	33.79	2e-10	NO
/gene_family="1336"	gi|239735488|ref|NP_001155128.1|	24.35	2.1
/gene_family="1061"	gi|117553627|ref|NP_004183.2|;gi|530420935|ref|XP_005274491.1|;gi|530423013|ref|XP_005274840.1|	28.35	0.002	NO
/gene_family="898"	gi|4557809|ref|NP_000265.1|;gi|578819508|ref|XP_006717934.1|	26.43	3e-22	NO
/gene_family="229"	gi|7661920|ref|NP_055555.1|	38.37	2e-85
/gene_family="880"	gi|333609274|ref|NP_001013712.4|;gi|530400244|ref|XP_005268927.1|	31.82	0.43
/gene_family="131"	gi|4503949|ref|NP_000152.1|;gi|66932968|ref|NP_001019195.1|	45.45	1e-56
/gene_family="1457"	gi|29171306|ref|NP_808218.1|	35.87	2e-82
/gene_family="1439"	gi|578825331|ref|XP_006720034.1|	28.49	7e-13	NO
/gene_family="1391"	gi|94681057|ref|NP_001035526.1|	27.99	3e-27	NO
/gene_family="120"	gi|530410420|ref|XP_005256747.1|	42.42	8.4
/gene_family="1445"	gi|112420958|ref|NP_861524.2|	28.05	3e-50	NO
/gene_family="579"	gi|530426967|ref|XP_005268373.1|	37.5	5.9
/gene_family="914"	gi|42544136|ref|NP_056528.2|	27.16	2e-23	NO
/gene_family="189"	gi|578823591|ref|XP_006719409.1|	28.43	4.6
/gene_family="438"	gi|110349750|ref|NP_036345.2|	25.33	6
/gene_family="588"	gi|4506205|ref|NP_002791.1|	28.7	0.26
/gene_family="383"	gi|22748651|ref|NP_689501.1|	34.04	1.1
/gene_family="61"	gi|578831007|ref|XP_006721992.1|;gi|578840206|ref|XP_006725339.1|;gi|578841198|ref|XP_006725689.1|	31.94	0.94
/gene_family="200"	gi|47519562|ref|NP_997404.1|;gi|530367842|ref|XP_005264491.1|	16.99	5
/gene_family="1468"	gi|315221152|ref|NP_001186731.1|	23.94	7e-08	NO
/gene_family="411"	gi|167614504|ref|NP_002282.2|	30.7	0.14
/gene_family="682"	gi|27477127|ref|NP_149022.3|	32.08	0.093
/gene_family="261"	gi|110349734|ref|NP_001036018.1|	28.2	6e-24	NO
/gene_family="589"	gi|7019477|ref|NP_037379.1|	32.79	0.62
/gene_family="1451"	gi|13375695|ref|NP_078813.1|	30.96	9e-64	NO
/gene_family="1208"	gi|189083849|ref|NP_000022.3|	41.5	2e-77
/gene_family="1505"	gi|22748709|ref|NP_689537.1|	28.81	9.2
/gene_family="402"	gi|13376725|ref|NP_079416.1|;gi|530401778|ref|XP_005253681.1|;gi|530401780|ref|XP_005253682.1|;gi|578824261|ref|XP_006719674.1|	60.61	0.013
/gene_family="1003"	gi|530404536|ref|XP_005268081.1|	31.58	2e-27	NO
/gene_family="724"	gi|578808709|ref|XP_006714124.1|	43.33	2.5
/gene_family="1056"	gi|4505489|ref|NP_002530.1|;gi|563580287|ref|NP_001274118.1|;gi|563580289|ref|NP_001274119.1|	25.26	3e-23	NO
/gene_family="1842"	gi|260593665|ref|NP_001159529.1|	34.55	0.22
/gene_family="1058"	gi|323635431|ref|NP_001191142.1|;gi|323635434|ref|NP_001191143.1|	31.82	0.19
/gene_family="852"	gi|22748849|ref|NP_689611.1|;gi|557948061|ref|NP_001273702.1|	26.79	0.81
/gene_family="583"	gi|4758668|ref|NP_004854.1|	29.95	2e-23	NO
/gene_family="1203"	gi|5031815|ref|NP_005539.1|	40.55	9e-119
/gene_family="325"	gi|67782305|ref|NP_000627.2|;gi|67782307|ref|NP_001019636.1|	35.86	1e-33
/gene_family="693"	gi|288541306|ref|NP_543023.2|	33.33	0.017
/gene_family="1800"	gi|530364401|ref|XP_005245066.1|	23.66	1
/gene_family="532"	gi|578827160|ref|XP_006720659.1|	22.39	0.28
/gene_family="581"	gi|578805921|ref|XP_006713147.1|	28.24	0.29
/gene_family="46"	gi|578809585|ref|XP_006714462.1|	35.44	4.1
/gene_family="69"	gi|310832431|ref|NP_001185599.1|	36.36	5
/gene_family="230"	gi|7705925|ref|NP_057370.1|	26.38	5e-13	NO
/gene_family="1196"	gi|578819182|ref|XP_006717796.1|	27.08	1.8
/gene_family="1480"	gi|256985183|ref|NP_066918.2|;gi|578803244|ref|XP_006712191.1|;gi|578803246|ref|XP_006712192.1|;gi|578803248|ref|XP_006712193.1|	22.79	4e-13	NO
/gene_family="714"	gi|530398785|ref|XP_005253806.1|	25.2	2e-24	NO
/gene_family="1417"	gi|578809921|ref|XP_006714537.1|	30.1	0.019
/gene_family="216"	gi|24234688|ref|NP_004125.3|	57	0
/gene_family="768"	gi|7661806|ref|NP_054894.1|	34.85	0.15
/gene_family="24"	gi|171184421|ref|NP_006463.3|	28.95	3.8
/gene_family="1671"	gi|58761500|ref|NP_037473.3|	42.16	1e-88
/gene_family="1043"	gi|109715852|ref|NP_001035940.1|	29.73	0.0006	NO
/gene_family="1189"	gi|15718687|ref|NP_000996.2|;gi|378548190|ref|NP_001243731.1|	25.68	1e-06	NO
/gene_family="1327"	gi|222352145|ref|NP_060893.2|;gi|530399249|ref|XP_005253474.1|	41.94	6.7
/gene_family="836"	gi|27545315|ref|NP_057444.2|	27.1	5e-21	NO
/gene_family="137"	gi|40068053|ref|NP_060119.3|	24.15	3e-08	NO
/gene_family="128"	gi|9910460|ref|NP_064587.1|	26.09	3e-08	NO
/gene_family="496"	gi|393535067|ref|NP_056540.2|	28.52	8e-25	NO
/gene_family="303"	gi|122937243|ref|NP_001073895.1|;gi|530365620|ref|XP_005245660.1|	31.82	3
/gene_family="857"	gi|56549113|ref|NP_057300.2|	20.25	8.8
/gene_family="1110"	gi|5174419|ref|NP_006003.1|	58.82	1e-74
/gene_family="342"	gi|530360729|ref|XP_005263597.1|	30.39	5e-16	NO
/gene_family="105"	gi|530387923|ref|XP_005273634.1|;gi|530387925|ref|XP_005273635.1|	41.03	2.7
/gene_family="1725"	gi|578802610|ref|XP_006711971.1|	30.86	0.22
/gene_family="215"	gi|325197164|ref|NP_001191439.1|	37.04	0.71
/gene_family="428"	gi|34577061|ref|NP_000659.2|	29.25	5e-19	NO
/gene_family="1243"	gi|15149476|ref|NP_002878.2|	20.87	1e-12	NO
/gene_family="705"	gi|544346261|ref|NP_001269715.1|	22.22	0.27
/gene_family="267"	gi|578804532|ref|XP_006712674.1|	31.78	0.034
/gene_family="1506"	gi|50301238|ref|NP_000628.2|	28.06	2e-07	NO
/gene_family="208"	gi|16306548|ref|NP_006504.2|	29.07	8e-52	NO
/gene_family="1238"	gi|149274653|ref|NP_065831.1|	24.26	0.004	NO
/gene_family="108"	gi|16306539|ref|NP_001787.2|;gi|530423505|ref|XP_005255816.1|	25	1.3
/gene_family="560"	gi|55925604|ref|NP_079286.2|	31.58	4.2
/gene_family="13"	gi|118572588|ref|NP_001752.2|	33.33	2.9
/gene_family="97"	gi|71051616|ref|NP_000365.3|	39.08	8e-79
/gene_family="1359"	gi|16507237|ref|NP_005338.1|	24.86	1e-07	NO
/gene_family="742"	gi|227116277|ref|NP_004203.2|	34.6	2e-78	NO
/gene_family="1572"	gi|530402454|ref|XP_005266489.1|	38.89	1.8
/gene_family="833"	gi|251831115|ref|YP_003024034.1|	27.27	2.7
/gene_family="1130"	gi|20357568|ref|NP_056238.2|	37.04	2.8
/gene_family="204"	gi|384367970|ref|NP_001244928.1|	28.93	5
/gene_family="1147"	gi|578813488|ref|XP_006715785.1|	33.73	5e-18	NO
/gene_family="365"	gi|612407800|ref|NP_001278405.1|	27.22	0.23
/gene_family="188"	gi|9961252|ref|NP_061338.1|	29.22	2e-15	NO
/gene_family="1634"	gi|11761621|ref|NP_068806.1|	21.8	4e-06	NO
/gene_family="697"	gi|8923900|ref|NP_061156.1|	30	4e-16	NO
/gene_family="177"	gi|301069346|ref|NP_001180268.1|	24.68	0.04
/gene_family="504"	gi|32528306|ref|NP_002904.3|	28.3	0.001	NO
/gene_family="940"	gi|578835600|ref|XP_006723712.1|	27.43	1e-12	NO
/gene_family="382"	gi|411147367|ref|NP_001258627.1|	30.58	5e-18	NO
/gene_family="1255"	gi|191252795|ref|NP_079095.3|;gi|191252797|ref|NP_001122103.1|;gi|568815620|ref|NP_001275584.1|;gi|568815653|ref|NP_001275583.1|;gi|578831421|ref|XP_006722154.1|	30.85	3e-24	NO
/gene_family="255"	gi|31542775|ref|NP_775898.2|;gi|578830769|ref|XP_006721902.1|	27.07	1.4
/gene_family="1100"	gi|628601897|ref|NP_001278770.1|	32.18	0.35
/gene_family="1022"	gi|116812636|ref|NP_071748.2|;gi|530370778|ref|XP_005246823.1|;gi|578804737|ref|XP_006712748.1|	28.4	3e-33	NO
/gene_family="33"	gi|4557415|ref|NP_000062.1|;gi|295821200|ref|NP_001171479.1|;gi|295821202|ref|NP_001171480.1|;gi|578836350|ref|XP_006723989.1|;gi|578836709|ref|XP_006724120.1|	40.13	3e-69
/gene_family="870"	gi|4504035|ref|NP_003866.1|	35.23	1e-90
/gene_family="950"	gi|4501951|ref|NP_000667.1|	38.24	2.4
/gene_family="82"	gi|312284070|ref|NP_060166.2|	21.13	0.22
/gene_family="694"	gi|530401708|ref|XP_005253648.1|	23.94	0.0004	NO
/gene_family="601"	gi|4506605|ref|NP_000969.1|	41.75	5e-14
/gene_family="286"	gi|9910460|ref|NP_064587.1|	31.7	2e-27	NO
/gene_family="1249"	gi|578812798|ref|XP_006715563.1|	29.73	0.0005	NO
/gene_family="664"	gi|255708477|ref|NP_001157413.1|	25.58	2e-08	NO
/gene_family="642"	gi|222831590|ref|NP_060762.3|	38.57	2e-84
/gene_family="127"	gi|33519475|ref|NP_004997.4|	28.67	3e-26	NO
/gene_family="866"	gi|574279253|ref|NP_001276023.1|	31.42	2e-53	NO
/gene_family="628"	gi|108796653|ref|NP_001035830.1|	36.17	0.76
/gene_family="820"	gi|375364515|ref|NP_001243624.1|	32.14	3.8
/gene_family="245"	gi|56549685|ref|NP_054889.2|	28.03	7e-08	NO
/gene_family="266"	gi|193083168|ref|NP_001122402.1|	31.25	8.3
/gene_family="1154"	gi|71037407|ref|NP_078896.3|;gi|578834892|ref|XP_006723444.1|;gi|578834894|ref|XP_006723445.1|;gi|578834896|ref|XP_006723446.1|;gi|578834898|ref|XP_006723447.1|	41.38	1.3
/gene_family="621"	gi|4506127|ref|NP_002755.1|	48.09	2e-100
/gene_family="295"	gi|342187274|ref|NP_001230111.1|	22.84	9e-44	NO
/gene_family="1392"	gi|24308295|ref|NP_079472.1|	32.37	2e-14	NO
/gene_family="1576"	gi|4501867|ref|NP_001089.1|	22.91	0.0002	NO
/gene_family="624"	gi|578828368|ref|XP_006721049.1|;gi|578840063|ref|XP_006725283.1|	27.83	1.4
/gene_family="28"	gi|578799625|ref|XP_006710901.1|	24.8	3e-13	NO
/gene_family="445"	gi|28416899|ref|NP_780294.1|	32.99	2e-58	NO
/gene_family="1316"	gi|5174529|ref|NP_005902.1|	54.47	1e-133
/gene_family="1129"	gi|530387938|ref|XP_005273641.1|	22.54	0.032
/gene_family="1408"	gi|578835950|ref|XP_006723837.1|	45.45	0.0005
/gene_family="1677"	gi|572882683|ref|NP_001275915.1|	32.2	2e-22	NO
/gene_family="150"	gi|4504031|ref|NP_001491.1|	55.25	2e-139
/gene_family="429"	gi|4826934|ref|NP_005125.1|	22.43	4
/gene_family="194"	gi|530378301|ref|XP_005263345.1|	28.3	3.9
/gene_family="763"	gi|18426902|ref|NP_064520.2|	29.33	1e-08	NO
/gene_family="1623"	gi|342187274|ref|NP_001230111.1|	30.87	1e-110	NO
/gene_family="1631"	gi|5032215|ref|NP_005827.1|	48	3e-39
/gene_family="652"	gi|46852147|ref|NP_060530.3|	33.6	2e-172	NO
/gene_family="998"	gi|270309167|ref|NP_001161857.1|	29.03	0.018
/gene_family="1598"	gi|194294508|ref|NP_001123571.1|	28.57	1.9
/gene_family="1197"	gi|225543525|ref|NP_006437.3|	28.81	0.66
/gene_family="6"	gi|21450679|ref|NP_659418.1|;gi|530395111|ref|XP_005252868.1|;gi|530395113|ref|XP_005252869.1|;gi|530395117|ref|XP_005252871.1|;gi|578820383|ref|XP_006718231.1|	31.94	0.022
/gene_family="1012"	gi|4504523|ref|NP_002148.1|	37.36	6e-10
/gene_family="728"	gi|4507635|ref|NP_003926.1|;gi|530788288|ref|NP_001269041.1|;gi|530788290|ref|NP_001269042.1|;gi|530420521|ref|XP_005261868.1|;gi|578837470|ref|XP_006724412.1|;gi|578837472|ref|XP_006724413.1|	24.48	3e-29	NO
/gene_family="1287"	gi|5803029|ref|NP_006822.1|;gi|578821108|ref|XP_006718488.1|	32.73	0.59
/gene_family="1113"	gi|4504035|ref|NP_003866.1|	28.04	2e-08	NO
/gene_family="1088"	gi|21361621|ref|NP_002624.2|	26.62	4e-10	NO
/gene_family="243"	gi|7657116|ref|NP_055179.1|	37.65	2e-73
/gene_family="98"	gi|70906444|ref|NP_001020420.1|	36.88	3e-25
/gene_family="51"	gi|298231236|ref|NP_064733.3|	23.74	3.1
/gene_family="1219"	gi|530393629|ref|XP_005269858.1|	27.5	0.63
/gene_family="326"	gi|568384711|ref|NP_001275521.1|	28.74	2.2
/gene_family="564"	gi|148886692|ref|NP_001008781.2|	24.24	0.034
/gene_family="977"	gi|156416003|ref|NP_004159.2|	33.56	8e-83	NO
/gene_family="72"	gi|578815095|ref|XP_006716319.1|	34.52	2.2
/gene_family="293"	gi|116063536|ref|NP_115690.3|	27.92	8e-22	NO
/gene_family="556"	gi|578810315|ref|XP_006714660.1|	40.79	4e-05
/gene_family="1727"	gi|18466806|ref|NP_569708.1|	36.59	9.3
/gene_family="1485"	gi|530395865|ref|XP_005253221.1|	33.33	2.6
/gene_family="1312"	gi|578832034|ref|XP_006722350.1|	36.76	3e-10
/gene_family="163"	gi|308818200|ref|NP_001184223.1|	28.8	0.006
/gene_family="354"	gi|578812559|ref|XP_006715467.1|	30.91	6.5
/gene_family="1209"	gi|578822370|ref|XP_006718966.1|	38.64	2.3
/gene_family="1097"	gi|4505467|ref|NP_002517.1|	21.79	7e-07	NO
/gene_family="205"	gi|38679892|ref|NP_006214.2|	36.08	9e-08
/gene_family="1245"	gi|21361633|ref|NP_060238.3|	25	1.1
/gene_family="1487"	gi|4506141|ref|NP_002766.1|	34.98	1e-33	NO
/gene_family="1178"	gi|499591491|ref|NP_001265096.1|	26.87	4e-32	NO
/gene_family="984"	gi|563580285|ref|NP_001274117.1|	25.33	0.27
/gene_family="123"	gi|19718751|ref|NP_550433.1|	39.91	5e-45
/gene_family="686"	gi|38327533|ref|NP_057217.2|	26.43	0.024
/gene_family="1021"	gi|18375501|ref|NP_001632.2|;gi|18375503|ref|NP_542379.1|;gi|18375505|ref|NP_542380.1|;gi|346644849|ref|NP_001231178.1|;gi|530403615|ref|XP_005267638.1|	49.61	3e-85
/gene_family="93"	gi|211971095|ref|NP_001130043.1|	36.21	1.2
/gene_family="1011"	gi|578837391|ref|XP_006724383.1|	29.63	5.7
/gene_family="1467"	gi|411147365|ref|NP_001258626.1|	30.27	8e-22	NO
/gene_family="611"	gi|11761621|ref|NP_068806.1|	26.47	0.29
/gene_family="307"	gi|578803432|ref|XP_006712231.1|;gi|578803434|ref|XP_006712232.1|;gi|578803436|ref|XP_006712233.1|	23.2	8e-05	NO
/gene_family="1030"	gi|530393927|ref|XP_005270002.1|	27.27	9.1
/gene_family="933"	gi|14210504|ref|NP_115882.1|	39.53	6.1
/gene_family="1441"	gi|395455051|ref|NP_001257421.1|	37.29	0.7
/gene_family="706"	gi|26051237|ref|NP_059122.2|	29.23	3.2
/gene_family="1105"	gi|157426893|ref|NP_068746.2|	32.69	4e-39	NO
/gene_family="1627"	gi|530378789|ref|XP_005248350.1|	29.6	7e-21	NO
/gene_family="721"	gi|558695424|ref|NP_001273897.1|	36.59	6.9
/gene_family="341"	gi|530380015|ref|XP_005272075.1|	40.82	1.9
/gene_family="935"	gi|578803312|ref|XP_006712218.1|	28.74	0.002	NO
/gene_family="469"	gi|530390857|ref|XP_005251921.1|	31.95	2e-17	NO
/gene_family="783"	gi|7706339|ref|NP_057143.1|	39.55	3e-27
/gene_family="598"	gi|300192933|ref|NP_006787.2|	43.69	3e-134
/gene_family="1296"	gi|530382523|ref|XP_005249419.1|;gi|530428118|ref|XP_005272926.1|;gi|530428457|ref|XP_005275078.1|	35.82	2e-175
/gene_family="867"	gi|530385671|ref|XP_005250292.1|	26.74	2.5
/gene_family="64"	gi|56550061|ref|NP_009192.2|	35.56	2.2
/gene_family="660"	gi|578827149|ref|XP_006720655.1|	32.56	0.37
/gene_family="1083"	gi|325995161|ref|NP_001191840.1|	40	0.13
/gene_family="1488"	gi|578802138|ref|XP_006711798.1|	32.31	0.39
/gene_family="425"	gi|530412104|ref|XP_005257364.1|	29.41	1.4
/gene_family="486"	gi|22035588|ref|NP_078816.2|;gi|22035590|ref|NP_663781.1|	34.38	0.022
/gene_family="1314"	gi|530410824|ref|XP_005256941.1|;gi|530410826|ref|XP_005256942.1|;gi|578830144|ref|XP_006721675.1|	30.49	2.5
/gene_family="597"	gi|109809759|ref|NP_821079.3|	26.83	4
/gene_family="1406"	gi|13699256|ref|NP_054829.2|	31.58	2.2
/gene_family="518"	gi|603844408|ref|NP_003377.2|	26.55	1.8
/gene_family="1215"	gi|157426893|ref|NP_068746.2|	47.53	0
/gene_family="152"	gi|30578416|ref|NP_849192.1|	32.56	1.1
/gene_family="572"	gi|5453718|ref|NP_006402.1|;gi|15100175|ref|NP_116130.2|;gi|530381375|ref|XP_005248863.1|;gi|530427725|ref|XP_005274887.1|;gi|530427895|ref|XP_005272819.1|;gi|530428576|ref|XP_005275131.1|;gi|530428854|ref|XP_005275261.1|;gi|530429140|ref|XP_005275395.1|;gi|530429496|ref|XP_005275562.1|	26.09	3e-13	NO
/gene_family="1622"	gi|557878595|ref|NP_001273620.1|	32.61	1.9
/gene_family="838"	gi|61743967|ref|NP_001012632.1|	35.28	1e-37
/gene_family="1502"	NO HITS			NO
/gene_family="250"	NO HITS			NO
/gene_family="1447"	NO HITS			NO
/gene_family="1748"	NO HITS			NO
/gene_family="971"	NO HITS			NO
/gene_family="1121"	NO HITS			NO
/gene_family="419"	NO HITS			NO
/gene_family="1084"	NO HITS			NO
/gene_family="275"	NO HITS			NO
/gene_family="926"	NO HITS			NO
/gene_family="765"	NO HITS			NO
/gene_family="1174"	NO HITS			NO
/gene_family="745"	NO HITS			NO
/gene_family="821"	NO HITS			NO
/gene_family="1453"	NO HITS			NO
/gene_family="88"	NO HITS			NO
/gene_family="253"	NO HITS			NO
/gene_family="83"	NO HITS			NO
/gene_family="1688"	NO HITS			NO
/gene_family="1450"	NO HITS			NO
/gene_family="288"	NO HITS			NO
/gene_family="1277"	NO HITS			NO
/gene_family="1224"	NO HITS			NO
/gene_family="451"	NO HITS			NO
/gene_family="277"	NO HITS			NO
/gene_family="116"	NO HITS			NO
/gene_family="544"	NO HITS			NO
/gene_family="1123"	NO HITS			NO
/gene_family="1595"	NO HITS			NO
/gene_family="17"	NO HITS			NO
/gene_family="740"	NO HITS			NO
/gene_family="1183"	NO HITS			NO
/gene_family="387"	NO HITS			NO
/gene_family="850"	NO HITS			NO
/gene_family="1017"	NO HITS			NO
/gene_family="437"	NO HITS			NO
/gene_family="690"	NO HITS			NO
/gene_family="1290"	NO HITS			NO
/gene_family="1321"	NO HITS			NO
/gene_family="359"	NO HITS			NO
/gene_family="668"	NO HITS			NO
/gene_family="1237"	gi|530383042|ref|XP_005248728.1|	24.71	1.8
/gene_family="967"	gi|24307899|ref|NP_005693.1|	27.33	3e-13	NO
/gene_family="1386"	gi|58294158|ref|NP_001010974.1|	28.74	0.74
/gene_family="1371"	gi|29029595|ref|NP_055434.2|;gi|541862116|ref|NP_001269399.1|	41.03	0.003
/gene_family="616"	gi|19923667|ref|NP_542388.2|	25.94	2.9
/gene_family="759"	gi|578838266|ref|XP_006724673.1|	32.56	0.081
/gene_family="542"	gi|45643138|ref|NP_277030.2|	31.4	3.7
/gene_family="985"	gi|188536108|ref|NP_001120930.1|	37.14	8e-11
/gene_family="1000"	gi|289547580|ref|NP_001073997.2|	21.14	0.42
/gene_family="1143"	gi|70906437|ref|NP_000500.2|	34.09	0.26
/gene_family="124"	gi|31543397|ref|NP_620061.2|	41.32	1e-95
/gene_family="1669"	gi|150036268|ref|NP_004002.2|	24.32	0.57
/gene_family="1604"	gi|108773793|ref|NP_001035810.1|	27.08	2e-51	NO
/gene_family="1131"	gi|291621630|ref|NP_001167579.1|	26.61	3.5
/gene_family="360"	gi|6005842|ref|NP_009129.1|	35.98	5e-28
/gene_family="1182"	gi|578838676|ref|XP_006724819.1|	38.71	4.5
/gene_family="1119"	gi|530419305|ref|XP_005261210.1|;gi|530419307|ref|XP_005261211.1|	24.84	0.001	NO
/gene_family="612"	gi|533869216|ref|NP_001269222.1|	29.66	3e-20	NO
/gene_family="663"	gi|530382430|ref|XP_005249373.1|	36.07	6.1
/gene_family="944"	gi|37595756|ref|NP_919417.1|	31.03	5e-67	NO
/gene_family="1465"	gi|38348336|ref|NP_940912.1|	26.97	2.5
/gene_family="418"	gi|38679946|ref|NP_065737.2|;gi|38679950|ref|NP_000654.2|;gi|188536080|ref|NP_001120920.1|	34.43	2.7
/gene_family="236"	gi|50592994|ref|NP_003320.2|	35.82	4e-10
/gene_family="1513"	gi|62177127|ref|NP_055826.1|	33.85	0.29
/gene_family="580"	gi|34303926|ref|NP_689481.2|	39.92	3e-52
/gene_family="112"	gi|42794009|ref|NP_001373.2|	25	0.015
/gene_family="1045"	gi|118026927|ref|NP_079091.3|	30.95	0.003	NO
/gene_family="970"	gi|578812798|ref|XP_006715563.1|	26.55	0.1
/gene_family="797"	gi|251831117|ref|YP_003024036.1|	24.29	2e-06	NO
/gene_family="930"	gi|163310725|ref|NP_079467.3|	29.21	0.92
/gene_family="257"	gi|578821981|ref|XP_006718829.1|	41.94	10
/gene_family="233"	gi|41393561|ref|NP_056991.2|	34.21	1e-56	NO
/gene_family="739"	gi|94981556|ref|NP_963925.2|	33.33	6.5
/gene_family="645"	gi|229577391|ref|NP_116098.2|	27.45	4
/gene_family="760"	gi|13540477|ref|NP_110380.1|	37.25	0.68
/gene_family="201"	gi|4557289|ref|NP_000021.1|	22.83	4e-20	NO
/gene_family="903"	gi|19923821|ref|NP_064519.2|;gi|359279859|ref|NP_001240652.1|;gi|359279861|ref|NP_001240653.1|	19.76	0.0004	NO
/gene_family="1395"	gi|578829684|ref|XP_006721503.1|	25.58	8.7
/gene_family="1122"	gi|8923448|ref|NP_060310.1|	33.61	2e-10	NO
/gene_family="1223"	gi|7706353|ref|NP_057163.1|	32.79	6.4
/gene_family="809"	gi|270265812|ref|NP_849158.2|	27.87	4e-13	NO
/gene_family="1066"	gi|20270317|ref|NP_620132.1|	28.41	1e-10	NO
/gene_family="1324"	gi|118402596|ref|NP_004652.2|	29.58	1.2
/gene_family="506"	gi|27881506|ref|NP_009120.1|	32.23	4e-68	NO
/gene_family="1433"	gi|134288884|ref|NP_001077083.1|	30.7	3e-42	NO
/gene_family="864"	gi|9994179|ref|NP_037392.1|	50	0.87
/gene_family="361"	gi|11761621|ref|NP_068806.1|	20.68	0.0005	NO
/gene_family="708"	gi|5803011|ref|NP_001966.1|	47.87	1e-131
/gene_family="772"	gi|157384956|ref|NP_079428.2|	42.97	7e-70
/gene_family="509"	gi|18201905|ref|NP_000166.2|;gi|530416229|ref|XP_005258821.1|;gi|578834293|ref|XP_006723211.1|	51.37	0
/gene_family="135"	gi|27881501|ref|NP_056472.2|	30	5e-20	NO
/gene_family="296"	gi|32189392|ref|NP_005800.3|	47.94	5e-58
/gene_family="1140"	gi|530397826|ref|XP_005271479.1|	27.73	0.92
/gene_family="494"	gi|530423647|ref|XP_005255884.1|	36.31	2e-62
/gene_family="110"	gi|530425796|ref|XP_005260809.1|	41.3	4.9
/gene_family="1048"	gi|530369521|ref|XP_005263884.1|	31.91	2.5
/gene_family="873"	gi|31542641|ref|NP_060476.2|	28.72	1e-42	NO
/gene_family="789"	gi|34916028|ref|NP_919274.1|	25.88	0.37
/gene_family="195"	gi|21359935|ref|NP_065744.2|	45.45	7.2
/gene_family="629"	gi|36949366|ref|NP_002431.2|	25.77	9e-08	NO
/gene_family="859"	gi|578824012|ref|XP_006719578.1|	32.2	1.4
/gene_family="225"	gi|154813204|ref|NP_002184.2|	34.09	0.97
/gene_family="1650"	gi|530404814|ref|XP_005268215.1|	28.81	1.6
/gene_family="1025"	gi|269846968|ref|NP_689704.4|	23.48	7e-08	NO
/gene_family="130"	gi|530390682|ref|XP_005251837.1|	29.61	1e-23	NO
/gene_family="1413"	gi|530413480|ref|XP_005256405.1|	23.28	2.6
/gene_family="1360"	gi|157384956|ref|NP_079428.2|	24.01	0.0003	NO
/gene_family="1637"	gi|4507709|ref|NP_003304.1|	27.78	3e-36	NO
/gene_family="584"	gi|32189394|ref|NP_001677.2|	23.99	0.0001	NO
/gene_family="720"	gi|4502171|ref|NP_000476.1|	45.61	7e-38
/gene_family="1016"	gi|7242140|ref|NP_006651.2|	48.16	2e-94
/gene_family="832"	gi|148539872|ref|NP_005882.2|	47.58	6e-125
/gene_family="1070"	gi|71725351|ref|NP_068595.3|	33.16	5e-19	NO
/gene_family="987"	gi|4557809|ref|NP_000265.1|;gi|578819508|ref|XP_006717934.1|	28.03	8e-34	NO
/gene_family="770"	gi|32483357|ref|NP_066284.2|	28.74	2e-23	NO
/gene_family="986"	gi|578816058|ref|XP_006716656.1|	25.64	5.7
/gene_family="709"	gi|226693357|ref|NP_001152794.1|	25.77	1.8
/gene_family="48"	gi|116686114|ref|NP_060141.3|	37.93	9.9
/gene_family="792"	gi|530404459|ref|XP_005268045.1|	27.33	5e-17	NO
/gene_family="461"	gi|71999143|ref|NP_001025186.1|	31.37	0.59
/gene_family="715"	gi|22035696|ref|NP_004702.2|	32.14	0.2
/gene_family="758"	gi|635574573|ref|NP_001278977.1|	31.03	3.8
/gene_family="1459"	gi|530411171|ref|XP_005258102.1|	25.23	0.012
/gene_family="996"	gi|530380811|ref|XP_005265852.1|	40	4.1
/gene_family="1518"	gi|7019415|ref|NP_037468.1|	25.59	0.074
/gene_family="435"	gi|116805327|ref|NP_064551.3|	44.07	6e-134
/gene_family="969"	gi|578825879|ref|XP_006720230.1|	37.21	5.7
/gene_family="561"	gi|27734697|ref|NP_775876.1|	21.7	3.8
/gene_family="1602"	gi|546231794|ref|NP_001271246.1|	23.36	0.24
/gene_family="596"	gi|11056044|ref|NP_066952.1|	26.46	9e-10	NO
/gene_family="481"	gi|156151379|ref|NP_001095866.1|	26.56	0.82
/gene_family="934"	gi|17149842|ref|NP_004461.2|;gi|17149844|ref|NP_476433.1|;gi|206725530|ref|NP_001128680.1|;gi|530396476|ref|XP_005273905.1|;gi|578821229|ref|XP_006718539.1|	25.51	0.41
/gene_family="283"	gi|385719198|ref|NP_001245323.1|	36.65	2e-54
/gene_family="1001"	gi|60499021|ref|NP_000131.2|	32.73	1e-40	NO
/gene_family="209"	gi|530400867|ref|XP_005269223.1|	31.97	2e-12	NO
/gene_family="472"	gi|189095269|ref|NP_001121164.1|	31.82	0.56
/gene_family="53"	gi|188497625|ref|NP_036337.2|	42.86	2.2
/gene_family="465"	gi|4504221|ref|NP_000849.1|;gi|226874833|ref|NP_001152863.1|;gi|338827696|ref|NP_001229768.1|	38.01	1e-29
/gene_family="234"	gi|6912540|ref|NP_036357.1|	28.57	2e-06	NO
/gene_family="1039"	gi|4557469|ref|NP_001273.1|	30.88	9.9
/gene_family="1157"	gi|578812427|ref|XP_006715412.1|	26.98	3e-05	NO
/gene_family="635"	gi|4557415|ref|NP_000062.1|;gi|295821200|ref|NP_001171479.1|;gi|295821202|ref|NP_001171480.1|;gi|578836350|ref|XP_006723989.1|;gi|578836709|ref|XP_006724120.1|	23.74	0.071
/gene_family="891"	gi|19923977|ref|NP_612455.1|	27	0.003	NO
/gene_family="827"	gi|491227401|ref|NP_001264984.1|	34.88	0.17
/gene_family="754"	gi|578810160|ref|XP_006714605.1|	31.25	2.3
/gene_family="157"	gi|578831638|ref|XP_006722237.1|	22.63	0.0004	NO
/gene_family="725"	gi|4506681|ref|NP_001006.1|	32	0.0001	NO
/gene_family="2"	gi|63025206|ref|NP_001010924.1|	30.91	2
/gene_family="884"	gi|530423195|ref|XP_005262621.1|	25	5.3
/gene_family="269"	gi|530370087|ref|XP_005246485.1|	33.9	2.9
/gene_family="370"	gi|4885413|ref|NP_005331.1|	37.86	1e-17
/gene_family="327"	gi|6631083|ref|NP_005257.2|;gi|32483412|ref|NP_859054.1|;gi|530363884|ref|XP_005273008.1|	25.93	1.2
/gene_family="1449"	gi|388240770|ref|NP_001252519.1|	23.61	4.1
/gene_family="1260"	gi|8923819|ref|NP_060909.1|	33.87	0.032
/gene_family="54"	gi|4758894|ref|NP_004555.1|	35.01	1e-83
/gene_family="630"	gi|300192933|ref|NP_006787.2|	34.88	7e-72	NO
/gene_family="1550"	gi|530400251|ref|XP_005268930.1|	27.48	0.097
/gene_family="1114"	gi|5453906|ref|NP_006310.1|	30.14	0.028
/gene_family="1301"	gi|7669492|ref|NP_002037.2|;gi|576583519|ref|NP_001276674.1|;gi|576583524|ref|NP_001276675.1|	39.82	9e-81
/gene_family="913"	gi|578823979|ref|XP_006719563.1|	27.4	1.2
/gene_family="1218"	gi|511772977|ref|NP_777591.3|	30.56	0.86
/gene_family="424"	gi|530368098|ref|XP_005264615.1|	31.01	4e-34	NO
/gene_family="919"	gi|379698826|ref|NP_001243888.1|	40	1.8
/gene_family="1187"	gi|100913206|ref|NP_001348.2|	32.89	0.91
/gene_family="733"	gi|169790915|ref|NP_001116105.1|	37.27	0
/gene_family="369"	gi|45446743|ref|NP_031398.2|;gi|45446747|ref|NP_987095.1|;gi|578830314|ref|XP_006721720.1|	28.97	4e-06	NO
/gene_family="922"	gi|32189394|ref|NP_001677.2|	31.59	5e-44	NO
/gene_family="514"	gi|21450759|ref|NP_659462.1|	41.07	0.093
/gene_family="804"	gi|61966695|ref|NP_001013645.1|	27.78	7
/gene_family="1148"	gi|578812944|ref|XP_006715617.1|;gi|578839537|ref|XP_006725076.1|	30.77	2.7
/gene_family="235"	gi|55925468|ref|NP_055725.2|;gi|209954811|ref|NP_001129628.1|	26.19	4.1
/gene_family="1194"	gi|222418558|ref|NP_001138450.1|	41.64	1e-73
/gene_family="1473"	gi|156139137|ref|NP_001095839.1|	39.39	0.32
/gene_family="784"	gi|530370202|ref|XP_005246539.1|	29.51	4.1
/gene_family="939"	gi|578835372|ref|XP_006723616.1|	32.73	3.4
/gene_family="595"	gi|66346674|ref|NP_150648.2|	41.67	7.5
/gene_family="593"	gi|22748727|ref|NP_689546.1|;gi|625180321|ref|NP_001278742.1|;gi|625180323|ref|NP_001278743.1|;gi|578825506|ref|XP_006720104.1|;gi|578825508|ref|XP_006720105.1|	40	3.9
/gene_family="805"	gi|56713256|ref|NP_001008662.1|	27.75	3e-40	NO
/gene_family="1055"	gi|530404688|ref|XP_005268154.1|	36.36	2.3
/gene_family="957"	gi|62912457|ref|NP_001017423.1|	34.78	2.5
/gene_family="221"	gi|255708477|ref|NP_001157413.1|	38.46	0.039
/gene_family="1432"	gi|73089054|ref|NP_001026849.1|;gi|301336162|ref|NP_001180389.1|;gi|301336164|ref|NP_001180390.1|	50.81	1e-35
/gene_family="1220"	gi|530411171|ref|XP_005258102.1|	40.35	0.02
/gene_family="1372"	gi|530424833|ref|XP_005258155.1|	21.71	0.11
/gene_family="539"	gi|116325993|ref|NP_001006608.2|	31.63	2
/gene_family="1568"	gi|578799003|ref|XP_006710661.1|	30.43	1.1
/gene_family="968"	gi|19913406|ref|NP_001058.2|	25.66	6e-17	NO
/gene_family="71"	gi|5031707|ref|NP_005503.1|;gi|193083139|ref|NP_001122394.1|;gi|530396584|ref|XP_005273959.1|	24.11	0.76
/gene_family="1624"	gi|359385708|ref|NP_001186978.2|	37.04	1.9
/gene_family="1431"	gi|134031945|ref|NP_940857.2|	31.11	5.9
/gene_family="503"	gi|530422334|ref|XP_005262425.1|	28.99	2.1
/gene_family="358"	gi|558516022|ref|NP_001273766.1|	27.18	0.0001	NO
/gene_family="619"	gi|37577164|ref|NP_919433.1|	26.83	1.5
/gene_family="91"	gi|157419140|ref|NP_061486.2|	43.75	6.4
/gene_family="1035"	gi|50659086|ref|NP_055132.2|	31.72	9e-27	NO
/gene_family="1829"	gi|17318565|ref|NP_477097.1|	23.08	4.5
/gene_family="442"	gi|39932583|ref|NP_060440.2|	33.9	0.88
/gene_family="1159"	gi|530367796|ref|XP_005264468.1|	25.16	2e-07	NO
/gene_family="170"	gi|530402436|ref|XP_005266480.1|;gi|530402438|ref|XP_005266481.1|;gi|578824920|ref|XP_006719900.1|	24.56	5e-55	NO
/gene_family="331"	gi|31543060|ref|NP_612422.2|	24.11	3e-18	NO
/gene_family="39"	gi|292606418|ref|YP_003541054.1|	30.19	1e-37	NO
/gene_family="1106"	gi|19743875|ref|NP_000134.2|	58.23	0
/gene_family="1546"	gi|40254992|ref|NP_116172.2|	40.76	5e-50
/gene_family="657"	gi|530402172|ref|XP_005266351.1|	29.31	3e-31	NO
/gene_family="576"	gi|153792148|ref|NP_079114.3|;gi|530392455|ref|XP_005252654.1|	28.87	8e-06	NO
/gene_family="785"	gi|578821990|ref|XP_006718831.1|	25.56	0.15
/gene_family="773"	gi|41393551|ref|NP_060631.2|	26.04	3e-07	NO
/gene_family="641"	gi|332688227|ref|NP_001193856.1|;gi|578811443|ref|XP_006715067.1|	30.12	0.4
/gene_family="492"	gi|24307989|ref|NP_055854.1|	29.17	0.092
/gene_family="1761"	gi|12007648|ref|NP_072090.1|	27.53	1e-40	NO
/gene_family="1363"	gi|530361552|ref|XP_005270407.1|	42.07	1e-87
/gene_family="399"	gi|52218826|ref|NP_001004452.1|	28.21	0.21
/gene_family="459"	gi|332634960|ref|NP_001155306.2|	22.94	2.8
/gene_family="966"	gi|24308436|ref|NP_612404.1|	34.31	5e-85	NO
/gene_family="1348"	gi|29789054|ref|NP_055937.1|;gi|239049457|ref|NP_001154830.1|;gi|578833116|ref|XP_006722764.1|;gi|578833118|ref|XP_006722765.1|	27.39	0.054
/gene_family="40"	gi|17158025|ref|NP_478072.1|	23.67	7e-15	NO
/gene_family="1514"	gi|5802974|ref|NP_006784.1|	29.5	0.009
/gene_family="1033"	gi|578824796|ref|XP_006719848.1|	20.48	6.4
/gene_family="90"	gi|4507521|ref|NP_001055.1|;gi|205277463|ref|NP_001128527.1|	26.94	2e-58	NO
/gene_family="352"	gi|219842220|ref|NP_001137254.1|	32.2	0.0001	NO
/gene_family="613"	gi|122937263|ref|NP_001073901.1|	31.25	2.1
/gene_family="477"	gi|578824662|ref|XP_006719797.1|	28.57	9.8
/gene_family="975"	gi|530373069|ref|XP_005265484.1|	26.74	8e-35	NO
/gene_family="343"	gi|251831114|ref|YP_003024033.1|	34.72	0.005
/gene_family="672"	gi|187281616|ref|NP_077718.3|	59.59	2e-64
/gene_family="522"	gi|38570109|ref|NP_942153.1|	26.45	7.5
/gene_family="179"	gi|530410148|ref|XP_005256617.1|	24.2	0.097
/gene_family="962"	gi|578843586|ref|XP_006726476.1|;gi|578843588|ref|XP_006726477.1|	28.75	3.1
/gene_family="7"	gi|499591687|ref|NP_001265098.1|	25.22	1e-27	NO
/gene_family="654"	gi|31563534|ref|NP_852136.1|	31.34	3e-21	NO
/gene_family="11"	gi|51243059|ref|NP_775738.3|	27.3	3e-21	NO
/gene_family="1071"	gi|196123589|ref|YP_002124312.1|	38.19	2e-79
/gene_family="591"	gi|530382148|ref|XP_005249237.1|	57.69	0.28
/gene_family="227"	gi|23503259|ref|NP_699170.1|	24.1	0.0003	NO
/gene_family="406"	gi|55769585|ref|NP_065089.2|;gi|255759934|ref|NP_001157588.1|	35.59	3.7
/gene_family="927"	gi|578805686|ref|XP_006713052.1|	24.27	2
/gene_family="647"	gi|76563936|ref|NP_697020.2|	45	4.3
/gene_family="1093"	gi|4557817|ref|NP_000427.1|	57.21	2e-75
/gene_family="302"	gi|93141226|ref|NP_003390.4|	41.3	0.31
/gene_family="626"	gi|34328899|ref|NP_005392.2|	25.53	1.8
/gene_family="615"	gi|149944509|ref|NP_066962.2|	27.91	9.8
/gene_family="1133"	gi|578829363|ref|XP_006721398.1|	36.21	1.6
/gene_family="536"	gi|530406156|ref|XP_005254586.1|	48.28	1.1
/gene_family="366"	gi|530394334|ref|XP_005270202.1|	27.8	4e-15	NO
/gene_family="946"	gi|11596859|ref|NP_071344.1|	34.78	1e-16	NO
/gene_family="1416"	gi|19743875|ref|NP_000134.2|	44.03	1e-124
/gene_family="156"	gi|17975772|ref|NP_510961.1|	33.68	5.2
/gene_family="912"	gi|109148508|ref|NP_060140.2|	20.93	6.5
/gene_family="143"	gi|530372634|ref|XP_005265275.1|	33.85	7.9
/gene_family="475"	gi|164663775|ref|NP_640335.2|	26.15	8e-16	NO
/gene_family="819"	gi|66933016|ref|NP_000875.2|	40.71	2e-99
/gene_family="203"	gi|4506691|ref|NP_001011.1|	33.1	5e-10	NO
/gene_family="1051"	gi|530414438|ref|XP_005259765.1|	42.31	0.0007
/gene_family="1607"	gi|112382372|ref|NP_060754.2|	21.05	1.8
/gene_family="145"	gi|530420214|ref|XP_005261722.1|	27.66	6.5
/gene_family="719"	gi|530416881|ref|XP_005259136.1|	22.12	0.42
/gene_family="1008"	gi|578809574|ref|XP_006714457.1|	32.81	1.4
/gene_family="1471"	gi|7661872|ref|NP_056155.1|;gi|530372179|ref|XP_005265063.1|	28.75	1.9
/gene_family="1347"	gi|21361334|ref|NP_001893.2|	50.28	5e-121
/gene_family="337"	gi|23397492|ref|NP_694958.1|	27.13	3e-06	NO
/gene_family="551"	gi|7706617|ref|NP_057725.1|	31.71	0.37
/gene_family="1124"	gi|186928852|ref|NP_057055.2|;gi|530412344|ref|XP_005257481.1|	33.76	4e-25	NO
/gene_family="928"	gi|73915092|ref|NP_038347.2|;gi|572152963|ref|NP_001275762.1|;gi|572153074|ref|NP_038265.2|	32.36	4e-61	NO
/gene_family="997"	gi|40789249|ref|NP_060592.2|	39.16	1e-131
/gene_family="1685"	gi|546231499|ref|NP_001271228.1|	28.3	0.57
/gene_family="795"	gi|222352127|ref|NP_001138424.1|	23.89	0.0002	NO
/gene_family="795"	gi|83281200|ref|NP_776175.2|	25.71	1.7
/gene_family="1037"	gi|530420149|ref|XP_005261690.1|	23.61	0.0001	NO
/gene_family="931"	gi|26638657|ref|NP_060441.2|	36.08	1e-11
/gene_family="434"	gi|7705897|ref|NP_057312.1|;gi|33469970|ref|NP_872603.1|;gi|557878725|ref|NP_001273612.1|	36.96	3.6
/gene_family="726"	gi|578815680|ref|XP_006716523.1|	28.97	0.054
/gene_family="159"	gi|385719224|ref|NP_001245335.1|	31.34	0.62
/gene_family="1094"	gi|46593007|ref|NP_003356.2|	26.42	6e-22	NO
/gene_family="168"	gi|42516563|ref|NP_079352.2|	25.78	3e-16	NO
/gene_family="751"	gi|5803092|ref|NP_006829.1|	28.4	8.6
/gene_family="100"	gi|578798933|ref|XP_006710636.1|	25.29	2.3
/gene_family="669"	gi|148612844|ref|NP_848654.3|	33.18	5e-25	NO
/gene_family="396"	gi|578806257|ref|XP_006713277.1|	23.97	0.35
/gene_family="1199"	gi|196123579|ref|YP_002124302.1|	36.61	1e-51
/gene_family="304"	gi|49574210|ref|NP_067034.2|;gi|219521826|ref|NP_001137139.1|	28.89	2.6
/gene_family="1268"	gi|53729337|ref|NP_002444.2|;gi|53729339|ref|NP_001005369.1|;gi|530367629|ref|XP_005264392.1|;gi|578802919|ref|XP_006712086.1|	39.7	5e-108
/gene_family="824"	gi|115387094|ref|NP_002991.2|	30.57	5e-29	NO
/gene_family="1615"	gi|13569960|ref|NP_112242.1|;gi|530365439|ref|XP_005245573.1|;gi|530365441|ref|XP_005245574.1|;gi|578801549|ref|XP_006711623.1|;gi|578801551|ref|XP_006711624.1|	26.46	0.007
/gene_family="1257"	gi|171846268|ref|NP_005717.3|	29.07	5e-17	NO
/gene_family="841"	gi|21361403|ref|NP_036605.2|;gi|578837158|ref|XP_006724289.1|	37.65	2e-17
/gene_family="890"	gi|166795303|ref|NP_061914.3|	42.28	2e-81
/gene_family="571"	gi|100913192|ref|NP_001035723.1|	23.13	0.53
/gene_family="52"	gi|62988355|ref|NP_001017928.1|	27.27	0.46
/gene_family="644"	gi|22547136|ref|NP_057040.2|;gi|22547138|ref|NP_666499.1|	41.75	7e-20
/gene_family="1193"	gi|21265040|ref|NP_054899.2|	27.88	1e-07	NO
/gene_family="185"	gi|70980549|ref|NP_055791.1|	26.56	1e-13	NO
/gene_family="300"	gi|530370204|ref|XP_005246540.1|;gi|530370208|ref|XP_005246542.1|	31.08	0.052
/gene_family="869"	gi|4505939|ref|NP_000928.1|	26.56	6e-49	NO
/gene_family="1479"	gi|7242140|ref|NP_006651.2|	27.2	2e-19	NO
/gene_family="1115"	gi|156523968|ref|NP_001609.2|	26.23	2.4
/gene_family="747"	gi|205360840|ref|NP_001128582.1|	27.27	2e-32	NO
/gene_family="908"	gi|4557817|ref|NP_000427.1|	56.68	3e-91
/gene_family="378"	gi|530412656|ref|XP_005257629.1|	27.45	1.5
/gene_family="485"	gi|530410142|ref|XP_005256615.1|	30.17	0.26
/gene_family="603"	gi|134288884|ref|NP_001077083.1|	30.57	4e-65	NO
/gene_family="264"	gi|4505471|ref|NP_002519.1|	27.68	5e-18	NO
/gene_family="247"	gi|530396822|ref|XP_005274072.1|	37.93	2e-05
/gene_family="559"	gi|18426902|ref|NP_064520.2|	35.33	3e-63
/gene_family="1356"	gi|208022653|ref|NP_001129071.1|	23.19	1.3
/gene_family="916"	gi|50659086|ref|NP_055132.2|	29.86	7e-11	NO
/gene_family="178"	gi|440309857|ref|NP_001258978.1|	32.76	2e-108	NO
/gene_family="731"	gi|578813042|ref|XP_006715655.1|	38.89	8.3
/gene_family="1267"	gi|530380512|ref|XP_005268485.1|	37.5	5.4
/gene_family="1424"	gi|4757810|ref|NP_004037.1|;gi|50345984|ref|NP_001001937.1|	59.24	0
/gene_family="958"	gi|36029914|ref|NP_079330.2|	33.33	3.8
/gene_family="847"	gi|112382231|ref|NP_612154.2|	30.61	0.22
/gene_family="727"	gi|4506687|ref|NP_001009.1|	40.58	7e-06
/gene_family="312"	gi|578813364|ref|XP_006715734.1|	29.03	0.8
/gene_family="488"	gi|9955963|ref|NP_005680.1|	30.63	3e-17	NO
/gene_family="535"	gi|578809052|ref|XP_006714249.1|	33.33	1.4
/gene_family="158"	gi|74271907|ref|NP_001028200.1|	27.17	9.7
/gene_family="262"	gi|38327625|ref|NP_004068.2|	28.36	2e-22	NO
/gene_family="422"	gi|224593249|ref|NP_775947.2|	30.88	0.86
/gene_family="1280"	gi|37594467|ref|NP_803877.2|	38.92	9e-44
/gene_family="1095"	gi|33300633|ref|NP_060341.2|	31.91	1e-07	NO
/gene_family="223"	gi|530424409|ref|XP_005256248.1|	43.81	5e-153
/gene_family="432"	gi|195539372|ref|NP_008969.2|	30.95	5
/gene_family="1529"	gi|56713256|ref|NP_001008662.1|	22.63	2e-14	NO
/gene_family="65"	gi|117190517|ref|NP_003951.3|	27.36	1e-06	NO
/gene_family="1211"	gi|4507645|ref|NP_000356.1|	34.85	1e-29	NO
/gene_family="1247"	gi|578836544|ref|XP_006724068.1|	26.92	1.7
/gene_family="921"	gi|203097003|ref|NP_065875.3|;gi|530392343|ref|XP_005252599.1|;gi|530392345|ref|XP_005252600.1|;gi|578818520|ref|XP_006717550.1|;gi|578818522|ref|XP_006717551.1|	30.88	0.002	NO
/gene_family="384"	gi|14165270|ref|NP_054797.2|	35.54	2e-21
/gene_family="810"	gi|38455391|ref|NP_006388.2|	22.38	1e-05	NO
/gene_family="904"	gi|50897284|ref|NP_001002913.1|	37.34	7e-21
/gene_family="151"	gi|7705409|ref|NP_057257.1|	33.16	5e-18	NO
/gene_family="811"	gi|511772963|ref|NP_001265443.1|	31.03	6.9
/gene_family="167"	gi|28372497|ref|NP_777576.1|	35.42	0.3
/gene_family="707"	gi|530408660|ref|XP_005255527.1|	27.91	1.1
/gene_family="1346"	gi|15029528|ref|NP_005283.1|;gi|148235349|ref|NP_001091670.1|;gi|578825249|ref|XP_006720009.1|	27.91	7.4
/gene_family="752"	gi|7705626|ref|NP_057149.1|	38.36	6e-12
/gene_family="839"	gi|578828072|ref|XP_006720941.1|	48.72	3.8
/gene_family="696"	gi|599044318|ref|NP_001265439.2|	34.78	0.56
/gene_family="1304"	gi|530419787|ref|XP_005261519.1|	29.05	3e-34	NO
/gene_family="1004"	gi|13540569|ref|NP_110418.1|	26.6	0.012
/gene_family="80"	gi|28416431|ref|NP_056475.1|	24.09	0.54
/gene_family="1236"	gi|285002214|ref|NP_001165447.1|;gi|285002216|ref|NP_060145.3|	28.92	0.15
/gene_family="1729"	gi|223029380|ref|NP_001138365.1|	24.29	4.6
/gene_family="813"	gi|154146199|ref|NP_741996.2|	26.17	0.99
/gene_family="897"	gi|108796649|ref|NP_001035826.1|	28	3.8
/gene_family="1006"	gi|578802182|ref|XP_006711817.1|;gi|578802184|ref|XP_006711818.1|	32.72	8e-19	NO
/gene_family="549"	gi|578819491|ref|XP_006717926.1|	43.02	5e-22
/gene_family="895"	gi|14165469|ref|NP_001010.2|;gi|71772415|ref|NP_001025180.1|	26.87	3e-08	NO
/gene_family="334"	gi|4557014|ref|NP_001743.1|	53.33	6e-173
/gene_family="771"	gi|312836765|ref|NP_001186109.1|	28.12	3.2
/gene_family="1322"	gi|170650661|ref|NP_006199.2|	31.65	3.1
/gene_family="474"	gi|4758788|ref|NP_004542.1|	30.61	7e-18	NO
/gene_family="947"	gi|530368098|ref|XP_005264615.1|	32.65	5e-51	NO
/gene_family="874"	gi|66933016|ref|NP_000875.2|	41.18	0.14
/gene_family="242"	gi|7705805|ref|NP_057118.1|	24.46	2e-19	NO
/gene_family="44"	gi|156415992|ref|NP_057104.2|;gi|530383770|ref|XP_005267062.1|	24.65	5e-14	NO
/gene_family="1325"	gi|411147367|ref|NP_001258627.1|	31.05	3e-26	NO
/gene_family="1401"	gi|209954795|ref|NP_001008401.3|;gi|584458454|ref|NP_001276880.1|;gi|584458460|ref|NP_001276881.1|	38.64	0.81
/gene_family="574"	gi|19923206|ref|NP_002056.2|;gi|74271826|ref|NP_001028228.1|;gi|74271837|ref|NP_001028216.1|;gi|578800828|ref|XP_006711341.1|	27.08	4e-14	NO
/gene_family="400"	gi|4503509|ref|NP_003741.1|	22.95	0.31
/gene_family="1059"	gi|149274653|ref|NP_065831.1|	22.44	0.4
/gene_family="160"	gi|23308577|ref|NP_006614.2|	33.67	4e-64	NO
/gene_family="107"	gi|31377775|ref|NP_036216.2|	30.27	1e-34	NO
/gene_family="1053"	gi|259013537|ref|NP_001158503.1|	33.02	0.001	NO
/gene_family="1152"	gi|578804153|ref|XP_006712521.1|	28.75	0.016
/gene_family="1437"	gi|578806389|ref|XP_006713328.1|	33.33	5.7
/gene_family="467"	gi|143770802|ref|NP_064621.3|	21.52	0.0001	NO
/gene_family="1217"	gi|166795303|ref|NP_061914.3|	36.82	4e-49
/gene_family="1231"	gi|170295797|ref|NP_001116106.1|	22.09	0.063
/gene_family="1491"	gi|578795664|ref|XP_006710239.1|	29.79	0.85
/gene_family="60"	gi|205360840|ref|NP_001128582.1|	29.6	7e-41	NO
/gene_family="1212"	gi|155030240|ref|NP_886552.2|	34.6	1e-27	NO
/gene_family="689"	gi|24308117|ref|NP_056481.1|;gi|530418068|ref|XP_005260450.1|;gi|578835952|ref|XP_006723838.1|	39.86	1e-46
/gene_family="409"	gi|66933009|ref|NP_001019553.1|;gi|530398051|ref|XP_005271588.1|;gi|530398053|ref|XP_005271589.1|	40.22	5e-50
/gene_family="1354"	gi|306518614|ref|NP_001182351.1|	33.7	4e-07	NO
/gene_family="206"	gi|4507691|ref|NP_003487.1|	26	2.5
/gene_family="1333"	gi|345478668|ref|NP_001230869.1|	25.93	6.4
/gene_family="1139"	gi|110624790|ref|NP_061987.3|	25	0.11
/gene_family="893"	gi|22035624|ref|NP_001254.2|	28.9	7e-08	NO
/gene_family="187"	gi|4505047|ref|NP_002336.1|	35.71	5.1
/gene_family="1635"	gi|530404536|ref|XP_005268081.1|	29.47	2e-11	NO
/gene_family="368"	gi|145699123|ref|NP_653259.3|	31.25	0.096
/gene_family="109"	gi|371875963|ref|NP_001243126.1|	30.49	2.2
/gene_family="57"	gi|530366583|ref|XP_005273370.1|	32.81	0.01
/gene_family="1410"	gi|4557269|ref|NP_000017.1|	26.1	8e-29	NO
/gene_family="1629"	gi|578800964|ref|XP_006711397.1|	24.59	0.99
/gene_family="980"	gi|153792148|ref|NP_079114.3|;gi|530392455|ref|XP_005252654.1|	40.68	4e-48
/gene_family="812"	gi|530410339|ref|XP_005256707.1|	29.85	3.4
/gene_family="527"	gi|153792564|ref|NP_001093116.1|	24.2	2e-07	NO
/gene_family="180"	gi|7656936|ref|NP_055020.1|	29.82	3.1
/gene_family="512"	gi|556695367|ref|NP_001273336.1|	33.14	4e-20	NO
/gene_family="1137"	gi|11056056|ref|NP_066930.1|;gi|16950589|ref|NP_203526.1|;gi|16950591|ref|NP_203527.1|	56.63	9e-26
/gene_family="520"	gi|32307132|ref|NP_066923.3|	22.92	0.001	NO
/gene_family="397"	gi|46249388|ref|NP_004568.2|;gi|530385298|ref|XP_005271830.1|;gi|530385300|ref|XP_005271831.1|;gi|530385302|ref|XP_005271832.1|;gi|530385304|ref|XP_005271833.1|;gi|530385306|ref|XP_005271834.1|;gi|578813583|ref|XP_006715823.1|	31.91	2e-17	NO
/gene_family="453"	gi|530402932|ref|XP_005267311.1|	42.68	1e-35
/gene_family="1593"	gi|8923559|ref|NP_060367.1|;gi|578806264|ref|XP_006713279.1|	42.14	6e-96
/gene_family="1425"	gi|530419000|ref|XP_005261074.1|	38.3	2.2
/gene_family="388"	gi|22749189|ref|NP_689790.1|	23.89	0.12
/gene_family="1350"	gi|530376696|ref|XP_005248176.1|	25.17	3.9
/gene_family="1044"	gi|74024895|ref|NP_036255.2|	43.54	1e-142
/gene_family="1556"	gi|530420037|ref|XP_005261638.1|	34.69	2.2
/gene_family="415"	No HITS			NO
/gene_family="995"	NP_659404.2	26	0.52
/gene_family="1102"	XP_005263800.1	41	5e-26
/gene_family="1601"	NP_001041677.1	33	0.66
/gene_family="346"	NP_000523.2	28	1e-12	NO
/gene_family="976"	NP_001245381.1	23	0.027
/gene_family="172"	No HITS			NO
/gene_family="1010"	NP_004279.3	36	6.9
/gene_family="455"	No HITS			NO
/gene_family="625"	No HITS			NO

## Sheet: non homololgs
query id,	subject ids,	% identity,	E-value	HOMOLOG
/gene_family="1613"	gi|578835539|ref|XP_006723683.1|;gi|578835541|ref|XP_006723684.1|	31.36	0.0001	NO
/gene_family="144"	gi|31581534|ref|NP_060116.2|	26.32	3e-18	NO
/gene_family="692"	gi|94538322|ref|NP_005317.2|	26.9	6e-07	NO
/gene_family="1663"	gi|4758184|ref|NP_004403.1|	25.14	2e-07	NO
/gene_family="263"	gi|5729820|ref|NP_006558.1|;gi|530381385|ref|XP_005248868.1|;gi|530381387|ref|XP_005248869.1|	29.93	3e-28	NO
/gene_family="276"	gi|4506749|ref|NP_001024.1|	33.58	8e-118	NO
/gene_family="174"	gi|4507215|ref|NP_003127.1|	31.25	7e-56	NO
/gene_family="222"	gi|578802182|ref|XP_006711817.1|;gi|578802184|ref|XP_006711818.1|	33.4	2e-74	NO
/gene_family="643"	gi|4502011|ref|NP_000467.1|	31.05	7e-25	NO
/gene_family="214"	gi|9910460|ref|NP_064587.1|	29.18	1e-28	NO
/gene_family="1495"	gi|578818605|ref|XP_006717579.1|	24.4	5e-06	NO
/gene_family="197"	gi|530377549|ref|XP_005262984.1|;gi|578809038|ref|XP_006714245.1|	29.79	9e-08	NO
/gene_family="173"	gi|57770468|ref|NP_001009905.1|;gi|578831989|ref|XP_006722335.1|	25.56	4e-08	NO
/gene_family="748"	gi|354983493|ref|NP_001238978.1|	27.51	2e-12	NO
/gene_family="268"	gi|165377209|ref|NP_001107000.1|	31.67	2e-38	NO
/gene_family="1150"	gi|533869216|ref|NP_001269222.1|	34.92	4e-08	NO
/gene_family="541"	gi|4507521|ref|NP_001055.1|;gi|205277463|ref|NP_001128527.1|	24.76	2e-19	NO
/gene_family="1472"	gi|7657339|ref|NP_055299.1|	27.5	1e-05	NO
/gene_family="698"	gi|296010906|ref|NP_001171565.1|	32.37	1e-47	NO
/gene_family="495"	gi|23238219|ref|NP_008999.2|;gi|578836874|ref|XP_006724173.1|	26.19	4e-09	NO
/gene_family="30"	gi|530382109|ref|XP_005249218.1|	33.78	7e-30	NO
/gene_family="37"	gi|530377430|ref|XP_005262925.1|	32.67	4e-46	NO
/gene_family="854"	gi|27436901|ref|NP_002940.2|	29.77	1e-07	NO
/gene_family="964"	gi|118572611|ref|NP_002475.2|	26.39	1e-12	NO
/gene_family="162"	gi|119943100|ref|NP_000523.2|	27.59	0.0002	NO
/gene_family="183"	gi|56118217|ref|NP_001008217.1|;gi|56237023|ref|NP_000394.2|;gi|189083684|ref|NP_001121093.1|	30.86	4e-47	NO
/gene_family="1436"	gi|16554611|ref|NP_112570.2|	29.63	8e-05	NO
/gene_family="803"	gi|56605983|ref|NP_068596.2|;gi|215272360|ref|NP_001135827.1|	31.48	6e-07	NO
/gene_family="577"	gi|116812579|ref|NP_057140.2|	33.77	4e-15	NO
/gene_family="1135"	gi|4885079|ref|NP_005165.1|	31.17	2e-27	NO
/gene_family="1080"	gi|11968182|ref|NP_072045.1|	26.43	2e-09	NO
/gene_family="1525"	gi|14141193|ref|NP_001004.2|;gi|530416994|ref|XP_005259192.1|;gi|530416996|ref|XP_005259193.1|;gi|530431386|ref|XP_005277141.1|;gi|530431388|ref|XP_005277142.1|;gi|530431823|ref|XP_005277331.1|;gi|530431917|ref|XP_005277372.1|;gi|530431919|ref|XP_005277373.1|;gi|530433542|ref|XP_005278344.1|;gi|530433544|ref|XP_005278345.1|;gi|578841778|ref|XP_006725939.1|;gi|578841780|ref|XP_006725940.1|;gi|5788…	27.94	0.002	NO
/gene_family="1429"	gi|222537719|ref|NP_660275.2|	27.92	3e-08	NO
/gene_family="344"	gi|5031777|ref|NP_005521.1|	32.31	1e-50	NO
/gene_family="23"	gi|4826742|ref|NP_005101.1|	31.45	9e-89	NO
/gene_family="618"	gi|7661872|ref|NP_056155.1|;gi|530372179|ref|XP_005265063.1|	32.8	3e-142	NO
/gene_family="945"	gi|188528628|ref|NP_149100.2|	33.33	2e-95	NO
/gene_family="552"	gi|239788483|ref|NP_001155091.1|	32.52	7e-30	NO
/gene_family="1275"	gi|4507835|ref|NP_000364.1|	23.74	3e-07	NO
/gene_family="1149"	gi|153792144|ref|NP_525021.3|	33.78	6e-30	NO
/gene_family="816"	gi|31377548|ref|NP_775853.2|	24.53	4e-08	NO
/gene_family="96"	gi|385719196|ref|NP_001245322.1|	30.6	3e-35	NO
/gene_family="1486"	gi|223718097|ref|NP_005006.3|	24.09	8e-10	NO
/gene_family="336"	gi|16579888|ref|NP_000498.2|;gi|189083692|ref|NP_001121100.1|	30.43	8e-19	NO
/gene_family="165"	gi|15055539|ref|NP_002943.2|	30.82	1e-13	NO
/gene_family="948"	gi|115648022|ref|NP_003974.3|;gi|115648063|ref|NP_001070253.1|	22.16	2e-10	NO
/gene_family="1028"	gi|578805879|ref|XP_006713131.1|	25.94	2e-14	NO
/gene_family="1342"	gi|21361454|ref|NP_037460.2|	26.09	3e-15	NO
/gene_family="1271"	gi|45269149|ref|NP_055113.2|	31.02	2e-36	NO
/gene_family="609"	gi|556695367|ref|NP_001273336.1|	28.65	4e-18	NO
/gene_family="585"	gi|4506697|ref|NP_001014.1|	28	2e-09	NO
/gene_family="1528"	gi|32189392|ref|NP_005800.3|	33.79	2e-10	NO
/gene_family="1061"	gi|117553627|ref|NP_004183.2|;gi|530420935|ref|XP_005274491.1|;gi|530423013|ref|XP_005274840.1|	28.35	0.002	NO
/gene_family="898"	gi|4557809|ref|NP_000265.1|;gi|578819508|ref|XP_006717934.1|	26.43	3e-22	NO
/gene_family="1439"	gi|578825331|ref|XP_006720034.1|	28.49	7e-13	NO
/gene_family="1391"	gi|94681057|ref|NP_001035526.1|	27.99	3e-27	NO
/gene_family="1445"	gi|112420958|ref|NP_861524.2|	28.05	3e-50	NO
/gene_family="914"	gi|42544136|ref|NP_056528.2|	27.16	2e-23	NO
/gene_family="1468"	gi|315221152|ref|NP_001186731.1|	23.94	7e-08	NO
/gene_family="261"	gi|110349734|ref|NP_001036018.1|	28.2	6e-24	NO
/gene_family="1451"	gi|13375695|ref|NP_078813.1|	30.96	9e-64	NO
/gene_family="1003"	gi|530404536|ref|XP_005268081.1|	31.58	2e-27	NO
/gene_family="1056"	gi|4505489|ref|NP_002530.1|;gi|563580287|ref|NP_001274118.1|;gi|563580289|ref|NP_001274119.1|	25.26	3e-23	NO
/gene_family="583"	gi|4758668|ref|NP_004854.1|	29.95	2e-23	NO
/gene_family="230"	gi|7705925|ref|NP_057370.1|	26.38	5e-13	NO
/gene_family="1480"	gi|256985183|ref|NP_066918.2|;gi|578803244|ref|XP_006712191.1|;gi|578803246|ref|XP_006712192.1|;gi|578803248|ref|XP_006712193.1|	22.79	4e-13	NO
/gene_family="714"	gi|530398785|ref|XP_005253806.1|	25.2	2e-24	NO
/gene_family="1043"	gi|109715852|ref|NP_001035940.1|	29.73	0.0006	NO
/gene_family="1189"	gi|15718687|ref|NP_000996.2|;gi|378548190|ref|NP_001243731.1|	25.68	1e-06	NO
/gene_family="836"	gi|27545315|ref|NP_057444.2|	27.1	5e-21	NO
/gene_family="137"	gi|40068053|ref|NP_060119.3|	24.15	3e-08	NO
/gene_family="128"	gi|9910460|ref|NP_064587.1|	26.09	3e-08	NO
/gene_family="496"	gi|393535067|ref|NP_056540.2|	28.52	8e-25	NO
/gene_family="342"	gi|530360729|ref|XP_005263597.1|	30.39	5e-16	NO
/gene_family="428"	gi|34577061|ref|NP_000659.2|	29.25	5e-19	NO
/gene_family="1243"	gi|15149476|ref|NP_002878.2|	20.87	1e-12	NO
/gene_family="1506"	gi|50301238|ref|NP_000628.2|	28.06	2e-07	NO
/gene_family="208"	gi|16306548|ref|NP_006504.2|	29.07	8e-52	NO
/gene_family="1238"	gi|149274653|ref|NP_065831.1|	24.26	0.004	NO
/gene_family="1359"	gi|16507237|ref|NP_005338.1|	24.86	1e-07	NO
/gene_family="742"	gi|227116277|ref|NP_004203.2|	34.6	2e-78	NO
/gene_family="1147"	gi|578813488|ref|XP_006715785.1|	33.73	5e-18	NO
/gene_family="188"	gi|9961252|ref|NP_061338.1|	29.22	2e-15	NO
/gene_family="1634"	gi|11761621|ref|NP_068806.1|	21.8	4e-06	NO
/gene_family="697"	gi|8923900|ref|NP_061156.1|	30	4e-16	NO
/gene_family="504"	gi|32528306|ref|NP_002904.3|	28.3	0.001	NO
/gene_family="940"	gi|578835600|ref|XP_006723712.1|	27.43	1e-12	NO
/gene_family="382"	gi|411147367|ref|NP_001258627.1|	30.58	5e-18	NO
/gene_family="1255"	gi|191252795|ref|NP_079095.3|;gi|191252797|ref|NP_001122103.1|;gi|568815620|ref|NP_001275584.1|;gi|568815653|ref|NP_001275583.1|;gi|578831421|ref|XP_006722154.1|	30.85	3e-24	NO
/gene_family="1022"	gi|116812636|ref|NP_071748.2|;gi|530370778|ref|XP_005246823.1|;gi|578804737|ref|XP_006712748.1|	28.4	3e-33	NO
/gene_family="694"	gi|530401708|ref|XP_005253648.1|	23.94	0.0004	NO
/gene_family="286"	gi|9910460|ref|NP_064587.1|	31.7	2e-27	NO
/gene_family="1249"	gi|578812798|ref|XP_006715563.1|	29.73	0.0005	NO
/gene_family="664"	gi|255708477|ref|NP_001157413.1|	25.58	2e-08	NO
/gene_family="127"	gi|33519475|ref|NP_004997.4|	28.67	3e-26	NO
/gene_family="866"	gi|574279253|ref|NP_001276023.1|	31.42	2e-53	NO
/gene_family="245"	gi|56549685|ref|NP_054889.2|	28.03	7e-08	NO
/gene_family="295"	gi|342187274|ref|NP_001230111.1|	22.84	9e-44	NO
/gene_family="1392"	gi|24308295|ref|NP_079472.1|	32.37	2e-14	NO
/gene_family="1576"	gi|4501867|ref|NP_001089.1|	22.91	0.0002	NO
/gene_family="28"	gi|578799625|ref|XP_006710901.1|	24.8	3e-13	NO
/gene_family="445"	gi|28416899|ref|NP_780294.1|	32.99	2e-58	NO
/gene_family="1677"	gi|572882683|ref|NP_001275915.1|	32.2	2e-22	NO
/gene_family="763"	gi|18426902|ref|NP_064520.2|	29.33	1e-08	NO
/gene_family="1623"	gi|342187274|ref|NP_001230111.1|	30.87	1e-110	NO
/gene_family="652"	gi|46852147|ref|NP_060530.3|	33.6	2e-172	NO
/gene_family="728"	gi|4507635|ref|NP_003926.1|;gi|530788288|ref|NP_001269041.1|;gi|530788290|ref|NP_001269042.1|;gi|530420521|ref|XP_005261868.1|;gi|578837470|ref|XP_006724412.1|;gi|578837472|ref|XP_006724413.1|	24.48	3e-29	NO
/gene_family="1113"	gi|4504035|ref|NP_003866.1|	28.04	2e-08	NO
/gene_family="1088"	gi|21361621|ref|NP_002624.2|	26.62	4e-10	NO
/gene_family="977"	gi|156416003|ref|NP_004159.2|	33.56	8e-83	NO
/gene_family="293"	gi|116063536|ref|NP_115690.3|	27.92	8e-22	NO
/gene_family="1097"	gi|4505467|ref|NP_002517.1|	21.79	7e-07	NO
/gene_family="1487"	gi|4506141|ref|NP_002766.1|	34.98	1e-33	NO
/gene_family="1178"	gi|499591491|ref|NP_001265096.1|	26.87	4e-32	NO
/gene_family="1467"	gi|411147365|ref|NP_001258626.1|	30.27	8e-22	NO
/gene_family="307"	gi|578803432|ref|XP_006712231.1|;gi|578803434|ref|XP_006712232.1|;gi|578803436|ref|XP_006712233.1|	23.2	8e-05	NO
/gene_family="1105"	gi|157426893|ref|NP_068746.2|	32.69	4e-39	NO
/gene_family="1627"	gi|530378789|ref|XP_005248350.1|	29.6	7e-21	NO
/gene_family="935"	gi|578803312|ref|XP_006712218.1|	28.74	0.002	NO
/gene_family="469"	gi|530390857|ref|XP_005251921.1|	31.95	2e-17	NO
/gene_family="572"	gi|5453718|ref|NP_006402.1|;gi|15100175|ref|NP_116130.2|;gi|530381375|ref|XP_005248863.1|;gi|530427725|ref|XP_005274887.1|;gi|530427895|ref|XP_005272819.1|;gi|530428576|ref|XP_005275131.1|;gi|530428854|ref|XP_005275261.1|;gi|530429140|ref|XP_005275395.1|;gi|530429496|ref|XP_005275562.1|	26.09	3e-13	NO
/gene_family="1502"	NO HITS			NO
/gene_family="250"	NO HITS			NO
/gene_family="1447"	NO HITS			NO
/gene_family="1748"	NO HITS			NO
/gene_family="971"	NO HITS			NO
/gene_family="1121"	NO HITS			NO
/gene_family="419"	NO HITS			NO
/gene_family="1084"	NO HITS			NO
/gene_family="275"	NO HITS			NO
/gene_family="926"	NO HITS			NO
/gene_family="765"	NO HITS			NO
/gene_family="1174"	NO HITS			NO
/gene_family="745"	NO HITS			NO
/gene_family="821"	NO HITS			NO
/gene_family="1453"	NO HITS			NO
/gene_family="88"	NO HITS			NO
/gene_family="253"	NO HITS			NO
/gene_family="83"	NO HITS			NO
/gene_family="1688"	NO HITS			NO
/gene_family="1450"	NO HITS			NO
/gene_family="288"	NO HITS			NO
/gene_family="1277"	NO HITS			NO
/gene_family="1224"	NO HITS			NO
/gene_family="451"	NO HITS			NO
/gene_family="277"	NO HITS			NO
/gene_family="116"	NO HITS			NO
/gene_family="544"	NO HITS			NO
/gene_family="1123"	NO HITS			NO
/gene_family="1595"	NO HITS			NO
/gene_family="17"	NO HITS			NO
/gene_family="740"	NO HITS			NO
/gene_family="1183"	NO HITS			NO
/gene_family="387"	NO HITS			NO
/gene_family="850"	NO HITS			NO
/gene_family="1017"	NO HITS			NO
/gene_family="437"	NO HITS			NO
/gene_family="690"	NO HITS			NO
/gene_family="1290"	NO HITS			NO
/gene_family="1321"	NO HITS			NO
/gene_family="359"	NO HITS			NO
/gene_family="668"	NO HITS			NO
/gene_family="967"	gi|24307899|ref|NP_005693.1|	27.33	3e-13	NO
/gene_family="1604"	gi|108773793|ref|NP_001035810.1|	27.08	2e-51	NO
/gene_family="1119"	gi|530419305|ref|XP_005261210.1|;gi|530419307|ref|XP_005261211.1|	24.84	0.001	NO
/gene_family="612"	gi|533869216|ref|NP_001269222.1|	29.66	3e-20	NO
/gene_family="944"	gi|37595756|ref|NP_919417.1|	31.03	5e-67	NO
/gene_family="1045"	gi|118026927|ref|NP_079091.3|	30.95	0.003	NO
/gene_family="797"	gi|251831117|ref|YP_003024036.1|	24.29	2e-06	NO
/gene_family="233"	gi|41393561|ref|NP_056991.2|	34.21	1e-56	NO
/gene_family="201"	gi|4557289|ref|NP_000021.1|	22.83	4e-20	NO
/gene_family="903"	gi|19923821|ref|NP_064519.2|;gi|359279859|ref|NP_001240652.1|;gi|359279861|ref|NP_001240653.1|	19.76	0.0004	NO
/gene_family="1122"	gi|8923448|ref|NP_060310.1|	33.61	2e-10	NO
/gene_family="809"	gi|270265812|ref|NP_849158.2|	27.87	4e-13	NO
/gene_family="1066"	gi|20270317|ref|NP_620132.1|	28.41	1e-10	NO
/gene_family="506"	gi|27881506|ref|NP_009120.1|	32.23	4e-68	NO
/gene_family="1433"	gi|134288884|ref|NP_001077083.1|	30.7	3e-42	NO
/gene_family="361"	gi|11761621|ref|NP_068806.1|	20.68	0.0005	NO
/gene_family="135"	gi|27881501|ref|NP_056472.2|	30	5e-20	NO
/gene_family="873"	gi|31542641|ref|NP_060476.2|	28.72	1e-42	NO
/gene_family="629"	gi|36949366|ref|NP_002431.2|	25.77	9e-08	NO
/gene_family="1025"	gi|269846968|ref|NP_689704.4|	23.48	7e-08	NO
/gene_family="130"	gi|530390682|ref|XP_005251837.1|	29.61	1e-23	NO
/gene_family="1360"	gi|157384956|ref|NP_079428.2|	24.01	0.0003	NO
/gene_family="1637"	gi|4507709|ref|NP_003304.1|	27.78	3e-36	NO
/gene_family="584"	gi|32189394|ref|NP_001677.2|	23.99	0.0001	NO
/gene_family="1070"	gi|71725351|ref|NP_068595.3|	33.16	5e-19	NO
/gene_family="987"	gi|4557809|ref|NP_000265.1|;gi|578819508|ref|XP_006717934.1|	28.03	8e-34	NO
/gene_family="770"	gi|32483357|ref|NP_066284.2|	28.74	2e-23	NO
/gene_family="792"	gi|530404459|ref|XP_005268045.1|	27.33	5e-17	NO
/gene_family="596"	gi|11056044|ref|NP_066952.1|	26.46	9e-10	NO
/gene_family="1001"	gi|60499021|ref|NP_000131.2|	32.73	1e-40	NO
/gene_family="209"	gi|530400867|ref|XP_005269223.1|	31.97	2e-12	NO
/gene_family="234"	gi|6912540|ref|NP_036357.1|	28.57	2e-06	NO
/gene_family="1157"	gi|578812427|ref|XP_006715412.1|	26.98	3e-05	NO
/gene_family="891"	gi|19923977|ref|NP_612455.1|	27	0.003	NO
/gene_family="157"	gi|578831638|ref|XP_006722237.1|	22.63	0.0004	NO
/gene_family="725"	gi|4506681|ref|NP_001006.1|	32	0.0001	NO
/gene_family="630"	gi|300192933|ref|NP_006787.2|	34.88	7e-72	NO
/gene_family="424"	gi|530368098|ref|XP_005264615.1|	31.01	4e-34	NO
/gene_family="369"	gi|45446743|ref|NP_031398.2|;gi|45446747|ref|NP_987095.1|;gi|578830314|ref|XP_006721720.1|	28.97	4e-06	NO
/gene_family="922"	gi|32189394|ref|NP_001677.2|	31.59	5e-44	NO
/gene_family="805"	gi|56713256|ref|NP_001008662.1|	27.75	3e-40	NO
/gene_family="968"	gi|19913406|ref|NP_001058.2|	25.66	6e-17	NO
/gene_family="358"	gi|558516022|ref|NP_001273766.1|	27.18	0.0001	NO
/gene_family="1035"	gi|50659086|ref|NP_055132.2|	31.72	9e-27	NO
/gene_family="1159"	gi|530367796|ref|XP_005264468.1|	25.16	2e-07	NO
/gene_family="170"	gi|530402436|ref|XP_005266480.1|;gi|530402438|ref|XP_005266481.1|;gi|578824920|ref|XP_006719900.1|	24.56	5e-55	NO
/gene_family="331"	gi|31543060|ref|NP_612422.2|	24.11	3e-18	NO
/gene_family="39"	gi|292606418|ref|YP_003541054.1|	30.19	1e-37	NO
/gene_family="657"	gi|530402172|ref|XP_005266351.1|	29.31	3e-31	NO
/gene_family="576"	gi|153792148|ref|NP_079114.3|;gi|530392455|ref|XP_005252654.1|	28.87	8e-06	NO
/gene_family="773"	gi|41393551|ref|NP_060631.2|	26.04	3e-07	NO
/gene_family="1761"	gi|12007648|ref|NP_072090.1|	27.53	1e-40	NO
/gene_family="966"	gi|24308436|ref|NP_612404.1|	34.31	5e-85	NO
/gene_family="40"	gi|17158025|ref|NP_478072.1|	23.67	7e-15	NO
/gene_family="90"	gi|4507521|ref|NP_001055.1|;gi|205277463|ref|NP_001128527.1|	26.94	2e-58	NO
/gene_family="352"	gi|219842220|ref|NP_001137254.1|	32.2	0.0001	NO
/gene_family="975"	gi|530373069|ref|XP_005265484.1|	26.74	8e-35	NO
/gene_family="7"	gi|499591687|ref|NP_001265098.1|	25.22	1e-27	NO
/gene_family="654"	gi|31563534|ref|NP_852136.1|	31.34	3e-21	NO
/gene_family="11"	gi|51243059|ref|NP_775738.3|	27.3	3e-21	NO
/gene_family="227"	gi|23503259|ref|NP_699170.1|	24.1	0.0003	NO
/gene_family="366"	gi|530394334|ref|XP_005270202.1|	27.8	4e-15	NO
/gene_family="946"	gi|11596859|ref|NP_071344.1|	34.78	1e-16	NO
/gene_family="475"	gi|164663775|ref|NP_640335.2|	26.15	8e-16	NO
/gene_family="203"	gi|4506691|ref|NP_001011.1|	33.1	5e-10	NO
/gene_family="337"	gi|23397492|ref|NP_694958.1|	27.13	3e-06	NO
/gene_family="1124"	gi|186928852|ref|NP_057055.2|;gi|530412344|ref|XP_005257481.1|	33.76	4e-25	NO
/gene_family="928"	gi|73915092|ref|NP_038347.2|;gi|572152963|ref|NP_001275762.1|;gi|572153074|ref|NP_038265.2|	32.36	4e-61	NO
/gene_family="795"	gi|222352127|ref|NP_001138424.1|	23.89	0.0002	NO
/gene_family="1037"	gi|530420149|ref|XP_005261690.1|	23.61	0.0001	NO
/gene_family="1094"	gi|46593007|ref|NP_003356.2|	26.42	6e-22	NO
/gene_family="168"	gi|42516563|ref|NP_079352.2|	25.78	3e-16	NO
/gene_family="669"	gi|148612844|ref|NP_848654.3|	33.18	5e-25	NO
/gene_family="824"	gi|115387094|ref|NP_002991.2|	30.57	5e-29	NO
/gene_family="1257"	gi|171846268|ref|NP_005717.3|	29.07	5e-17	NO
/gene_family="1193"	gi|21265040|ref|NP_054899.2|	27.88	1e-07	NO
/gene_family="185"	gi|70980549|ref|NP_055791.1|	26.56	1e-13	NO
/gene_family="869"	gi|4505939|ref|NP_000928.1|	26.56	6e-49	NO
/gene_family="1479"	gi|7242140|ref|NP_006651.2|	27.2	2e-19	NO
/gene_family="747"	gi|205360840|ref|NP_001128582.1|	27.27	2e-32	NO
/gene_family="603"	gi|134288884|ref|NP_001077083.1|	30.57	4e-65	NO
/gene_family="264"	gi|4505471|ref|NP_002519.1|	27.68	5e-18	NO
/gene_family="916"	gi|50659086|ref|NP_055132.2|	29.86	7e-11	NO
/gene_family="178"	gi|440309857|ref|NP_001258978.1|	32.76	2e-108	NO
/gene_family="488"	gi|9955963|ref|NP_005680.1|	30.63	3e-17	NO
/gene_family="262"	gi|38327625|ref|NP_004068.2|	28.36	2e-22	NO
/gene_family="1095"	gi|33300633|ref|NP_060341.2|	31.91	1e-07	NO
/gene_family="1529"	gi|56713256|ref|NP_001008662.1|	22.63	2e-14	NO
/gene_family="65"	gi|117190517|ref|NP_003951.3|	27.36	1e-06	NO
/gene_family="1211"	gi|4507645|ref|NP_000356.1|	34.85	1e-29	NO
/gene_family="921"	gi|203097003|ref|NP_065875.3|;gi|530392343|ref|XP_005252599.1|;gi|530392345|ref|XP_005252600.1|;gi|578818520|ref|XP_006717550.1|;gi|578818522|ref|XP_006717551.1|	30.88	0.002	NO
/gene_family="810"	gi|38455391|ref|NP_006388.2|	22.38	1e-05	NO
/gene_family="151"	gi|7705409|ref|NP_057257.1|	33.16	5e-18	NO
/gene_family="1304"	gi|530419787|ref|XP_005261519.1|	29.05	3e-34	NO
/gene_family="1006"	gi|578802182|ref|XP_006711817.1|;gi|578802184|ref|XP_006711818.1|	32.72	8e-19	NO
/gene_family="895"	gi|14165469|ref|NP_001010.2|;gi|71772415|ref|NP_001025180.1|	26.87	3e-08	NO
/gene_family="474"	gi|4758788|ref|NP_004542.1|	30.61	7e-18	NO
/gene_family="947"	gi|530368098|ref|XP_005264615.1|	32.65	5e-51	NO
/gene_family="242"	gi|7705805|ref|NP_057118.1|	24.46	2e-19	NO
/gene_family="44"	gi|156415992|ref|NP_057104.2|;gi|530383770|ref|XP_005267062.1|	24.65	5e-14	NO
/gene_family="1325"	gi|411147367|ref|NP_001258627.1|	31.05	3e-26	NO
/gene_family="574"	gi|19923206|ref|NP_002056.2|;gi|74271826|ref|NP_001028228.1|;gi|74271837|ref|NP_001028216.1|;gi|578800828|ref|XP_006711341.1|	27.08	4e-14	NO
/gene_family="160"	gi|23308577|ref|NP_006614.2|	33.67	4e-64	NO
/gene_family="107"	gi|31377775|ref|NP_036216.2|	30.27	1e-34	NO
/gene_family="1053"	gi|259013537|ref|NP_001158503.1|	33.02	0.001	NO
/gene_family="467"	gi|143770802|ref|NP_064621.3|	21.52	0.0001	NO
/gene_family="60"	gi|205360840|ref|NP_001128582.1|	29.6	7e-41	NO
/gene_family="1212"	gi|155030240|ref|NP_886552.2|	34.6	1e-27	NO
/gene_family="1354"	gi|306518614|ref|NP_001182351.1|	33.7	4e-07	NO
/gene_family="893"	gi|22035624|ref|NP_001254.2|	28.9	7e-08	NO
/gene_family="1635"	gi|530404536|ref|XP_005268081.1|	29.47	2e-11	NO
/gene_family="1410"	gi|4557269|ref|NP_000017.1|	26.1	8e-29	NO
/gene_family="527"	gi|153792564|ref|NP_001093116.1|	24.2	2e-07	NO
/gene_family="512"	gi|556695367|ref|NP_001273336.1|	33.14	4e-20	NO
/gene_family="520"	gi|32307132|ref|NP_066923.3|	22.92	0.001	NO
/gene_family="397"	gi|46249388|ref|NP_004568.2|;gi|530385298|ref|XP_005271830.1|;gi|530385300|ref|XP_005271831.1|;gi|530385302|ref|XP_005271832.1|;gi|530385304|ref|XP_005271833.1|;gi|530385306|ref|XP_005271834.1|;gi|578813583|ref|XP_006715823.1|	31.91	2e-17	NO
/gene_family="415"	No HITS			NO
/gene_family="346"	NP_000523.2	28	1e-12	NO
/gene_family="172"	No HITS			NO
/gene_family="455"	No HITS			NO
/gene_family="625"	No HITS			NO
