# Supplementary material for: Pan-Genome Analysis of Human Gastric Pathogen H. pylori: Comparative Genomics and Pathogenomics Approaches to Identify Regions Associated with Pathogenicity and Prediction of Potential Core Therapeutic Targets
Source: Biomed Res Int. 2015 Jan 29;2015:139580. doi: 10.1155/2015/139580 (PMC4325212; doi:10.1155/2015/139580)
Supplement: Supplementary file 1 — The supplementary data provides insight view to results originally extracted from different tools and databases. Because of availability of large dataset it was not possible to incorporate all of it the article. You can access the additional files having the composition of core genome families of all 1193 genomes (Additional file 1). Additional file 2 contains BLAST data extracted from DEG, number of homologs along with their AC number against all query proteins. Additional file 3 contains BLAST result of gene families against Human genome to find non-human homologs. Protein sequence of all gene families has been provided in Additional file 4. Additional file 5 gives a comprehensive view of all predicted epitopes along with their location and their predictions as antigenic or not. [file 139580.f1.zip › supplementary material/Additional file 4.txt]

> /gene_family="1495" /family_size="39" 
LLETLQLNPEQRKAASALQGHNLIIASAGTGKTSTIVGRILHLLNNGIKPEEILLLTFTN
KASNEMIARVAKYSKLSSKIEAGTFHAVAYRYLKEHYPNLSLKQPKELRKLLESIVDTKN
ALNATDEDKKPYTSQHLYALYSLYTNALKQEDFSAWLSSKNPEHAPYAAFYENILEEFEN
TKKKHDYIDYNDLLLLFKKAMLERPSPYKEVLCDEFQDTNPLQESILDAINPPSLFCVGD
YDQSIYAFNGADISIISNFTQKYKNARVFTLTKNYRSSKEILDLANQVIQHNQRIYPKNL
EVVKSGKFNKPTLLNYNDNIAQCQDIAKRIVMRKDFKEVAVIFRNNASADQLEAALRSHN
VPSKRKGSASFFESKEVALALDICALLFNPKDIMAAIHILSYISDIGSNTAKDIHEALML
LGNGDLKSALIQPNQEAKIYTKKKEITSMGLFEEIFALENSSRFNSVIDKAFHSHPVLMH
PKISLNGAKTLSDFFILYTKAPTHSPSALIKHILESTFFQTFKTRLLKERSKNKDGSYNE
FKKLQAQKRFNEKMDLLSSLAKNYQNLGRFLNGTLIGSSEATQGEGVNLLSVHASKGLEF
KDIYIIDLMEGRFPNHKLMNTGGGIEEERRLFYVAITRAKENLWLSYAKNELRENAKPKE
HKPSVFLYEAGLLKLDSK
> /gene_family="1623" /family_size="39" 
MKESFYIEGMTCTACSSGIERSLGRKSFVKKIEVSLLNKSANIEFNENETNLDEIFKLIE
KLGYSPKKTLAEEKKEFFSPNVKLALAVIFTLFVVYLSMGAMLSPSLLPESLLTINNHSN
FLNACLQLIGTLIVMHWGRDFYIQGFKALWHRQPNMSSLIAIGTSAALASSLWQLYFVYT
NQWSYGHYYFESVCVILTFVMVGKRIENISKDKALDAMQALMKNAPKTALKMQNNQQIEV
LVDSIVVGDILKVLPGSAIAVDGEIIEGEGELDESMLSGEALPVYKKVGDKVFSGTLNSN
TSFLMKATQDNKNSTLSQIIEMIHNAQSSKAEISRLADKVSSVFVPSVIAIAILAFVVWL
IIAPKPDFWWNFGIALEVFVSVLVISCPCALGLATPMSILVANQKASSLGLFFKDAKSLE
KARLVNTIVFDKTGTLTNGKPVVKSVHSNIELLELLSLASSIEKSSEHVIAKGIVEYAKE
HDAPLKEISEVKVKTGFGISAKVDYQGAKEIIKVGNSEFFNPINTLEIQENGILVFVGRA
INEKEDELLGAFVLEDLPKKGVKEHVAQIKNLGINTFLLSGDNRENVKKCALELGIDGYI
SNAKPQDKLNKIKELKEKGRIVMMVGDGLNDAPSLAMSDVAVVMAKGSDVSVQAADIVSF
NNDIKSVYSAIKLSQATIKNIKENLFWAFCYNSVFIPLACGVLYKANIMLSPAIAGLAMS
LSSVSVVLNSQRLRNFKIKDH
> /gene_family="1487" /family_size="39" /organism="Helicobacter_pylori_2017_prodigal.orf.fsa"
MKKTLFVSLALALSLNAGNIQIQNMPKVKERISVPSKEDTIYSYHDSIKDSIKAVVNIST
EKKIKNNFIGGGVFNDPFFQQFFGDLGGMIPKERMERALGSGVIISKDGYIVTNNHVIDG
ADKIKVTIPGSNKEYSATLVGTDSESDLAVIRITKDNLPTIKFSDSNDILVGDLVFAIGN
PFGVGESVTQGIVSALNKSGIGINSYENFIQTDASINPGNSGGALIDSRGGLVGINTAII
SKTGGNHGIGFAIPSNMVKDIVTQLIKTGKIERGYLGVGLQDLSGDLQNSYDNKEGAVVI
SVEKDSPAKKAGILVWDLITEVNGKKVKNTNELRNLIGSMLPNQRVTLKVIRDKKERTFT
LTLAERKNPNKKETISAQNGVQGQLNGLQVEDLTQKTKRSMRLSDDVQGVLVSQVNENSP
AEQAGFRQGNIITKIEEIEVKSVADFNHALEKYRGKPKRFLVLDLNQGYRIILVK
> /gene_family="1447" /family_size="39" /organism="Helicobacter_pylori_2017_prodigal.orf.fsa"
LKILILFLIGLNALFALDLNALKTGIKETYLKEYKDLKLEIETINLEIPERFSHASILSY
ELSASNKLKKDGVVFLRLENEPNLRLPVRYSVIGSMQAFKSASAIKKDENITANNTKKER
VSFGALSNPLLEGAIDKVSAKNFIPPDTLLSADKTQALIIVRKNDIITGVYEEGQISIEI
SLKALENGALNQIIQAKNLESNKILKAKVLSSSKAQIL
> /gene_family="821" /family_size="39" /organism="Helicobacter_pylori_2017_prodigal.orf.fsa"
MFKKIIFLCVFLIGGFVIPPLEAMPILRNKTPKKNYQEAHEKLYRSIINRQKLTRKKSGW
YFLGGVGAVEAIKDYQGKEMKDWIATLNLKTGVQSFFKKYIGIRGVFAWDLGSGKVNYQS
YKDPTNSFFTMLAVGLDVIMEFPLGSYKHYLGAFGGARGALVVYTDKQNFKFFKHSVVSG
GLAISGGVMLTLFLRHRIELGFKILPTARLLSSSSRFETSPLFYAAYSYKF
> /gene_family="222" /family_size="39" /organism="Helicobacter_pylori_2017_prodigal.orf.fsa"
LKLFFRRYSKYLKEHYKSFIVVLFSSLVVALSTAWGTYLVKPTLDEIFINKDTHMLKILP
FLVILAYLGKSGGIYLGTYFTNFIGLDIVKKIRNAMLESLLKMEMDFFNRTKKGELIARI
TNDIGLIRASLSNYLSESLREGLTIVGLVGVVIYQSPKLALVGLVIMPLAAIPISKIIRK
VKKLAKAHQESNAKITARLSEVFNNVEAIKISNGEKLEHKAFVKENEAFFKIGIRNIAVA
EISSPLMEFLGSIAIALVIYLGGNEVIKGHISVGAFFSFITALFMLYTPIKRLTRIVSNF
QEALVASDRIHEILEREPAIIDGELTLDNAIHTIEFKKVWLAYVLDNQERYVLSDISLKF
QQNEIIALKGESGSGKSSLVNLILRLYEPSKGEIFINDQKIESITQKSLREKISVVTQRV
FIFNGSVAENVAYGLEIDEIKIKECLKKAQALDFVEKMPHGIESVLDEFGANLSGGQRQR
IAIARALYKDAQVLIFDEATSALDNHTEESVKQSILELKQNRLIILISHNPSTLKLATKH
VKLEHGRLIEC
> /gene_family="197" /family_size="39" /organism="Helicobacter_pylori_2017_prodigal.orf.fsa"
LLKKITHQIKALSELVALEHTIFSSMFLLMAMVISSYQKNQTLFFGLETLILCFLALLGA
RNFAMGFNRLVDRDIDKDNPRTKNRPSVDGRISVKGMVIFSVSNALLFVVVSYFINPLAF
KLSLPFLIILGGYSYFKRFSSLAHFVVGLALGLAPIAGSVAVLGAIPLWNVFLALGVMLW
VAGFDLLYSLQDMEFDKERGLFSIPSQLGEKWCLNLSRLSHLVALICWLCFVKCYHGGLF
AYLGLGVSALILLYEQILVARDYKNIPKAFFVSNGYLGVVFFIFIVLDVGFKHA
> /gene_family="577" /family_size="39" /organism="Helicobacter_pylori_2017_prodigal.orf.fsa"
MALYDRANSRNAYAEDSVLHESELVSFVKTTYKFFAGSLLLATIGALLGLMNFQAVVQYK
WVFFIAEIVAFFGLMFSKSKPGLNLFMLFAFTSLSGVTLVPLLGMVIAKAGLGAVWQALG
MTTIVFGLMSVYALKTKNDLANMGKMLFIALIVVVVCSLINLFLGSPMFQVVIAGASAIL
FSLYIAYDTQNIVKGMYDSPIDAAVSLYLDFLNVFISILQIIGIFSDRDK
> /gene_family="1486" /family_size="39" /organism="Helicobacter_pylori_2017_prodigal.orf.fsa"
MDKNNNNNLRLILAIALSFLFIALYSYFFQKPNKPTTETTKQETTNNHTTISPNAPNAQH
FSVTQTIPQESLLSTISFEHARIEIDSLGRIKQVYLKDKKYLTPKEKGFLEHVGHLFSSK
ENSQPSLKELPLLAADKLKPLEVRFLDPTLNNKAFNTPYSASKTTLGPNEQLVLTQDLGV
LSIIKTLTFYDDLHYDLKIAFKSSNNLIPSYVITNGYRPVADLDSYTFSGVLLENNDKKI
EKIEDKDAKEIKRFSNTLFLSSVDRYFTTLLFTKDPQGFEALIDSEIGTKNPLGFISLKN
EANLHGYIGPKDYRSLKAISPMLTDVIEYGLITFFAKGVFVLLDYLYQFVGNWGWAIIFL
TIIVRIVLYPLSYKGMVSMQKLKELAPKMKELQEKYKGEPQKLQAHMMQLYKKHGANPLG
GCLPLILQIPVFFAIYRVLYNAVELKSSEWVLWIHDLSIMDPYFILPLLMGASMYWHQSV
TPNTMTDPMQAKIFKLLPLLFTIFLITFPAGLVLYWTTNNILSVLQQLIINKVLENKKRV
HAQNIKE
> /gene_family="948" /family_size="50" /organism="Helicobacter_pylori_2017_prodigal.orf.fsa"
MEHQNTTQKQGELKRDMKMRHLLMIAFGGAIGTGLFVGTGGNIASAGPLGTLIAYCFGGL
VVYCIMLSLGELASVYPTTGSFGDYAAKFIGPGTGYMVFWMYWLGWVITVALEYIAIGML
MQRWFVNIPIHYWVISCIALVFLLNFFSVKIFAEGEFFFSLIKVLAVIAFIGIGVIGIVY
QIYLHGFSSIFDNFHFGDKGFFPNGSEAVFSAMLAVIFAFTGTEVIGVAVGETKNASEVM
PKAIKATLWRIVFFFLGSVFVISVFLPMNDSSIAQSPFVSVLERINLPFIGMGIPYVADI
MNAVIITAMFSTANSGLYGASRMIYGLSKQKMFFKVFSQLNRQGTPTYAMFFSLSFSLIG
LLVQIYAKENVVEALINVISFTVIIVWVSVSISQYSFRKQYLKAGHSLEDLPYKAPFLPF
LQLIGITGCIIGVIGSAMDKDQRIGMILTIVFAVVCYIGYYFTQKANENNKKDLI
> /gene_family="1028" /family_size="39" /organism="Helicobacter_pylori_2017_prodigal.orf.fsa"
MEIAVFGGGAWGRALAFAFGEKNEVKIISRRDLNEPLKKLNDALISKGSAPIEQVDLERG
LKAALYVIAISVQHLREWFQNASLPKNAKVLIASKGIEVLNKAFVSEIAKDFIDPNALCF
LAGPSFAAEIIQGLPCALVIHSNNQALALEFANKTPSFIRAYAQQDIIGGEIAGAYKNVI
AIAGGVCDGLKLGNSAKASLLSRGLVEMQRFGAFFGGKTETFLGLSGAGDLFLTANSILS
RNYRVGLGLAQNKPLEVVLEELGEVAEGVKTTNAIVEIARKYGIYTPIASELALLLKGKS
VLESMNDLIRRA
> /gene_family="1439" /family_size="39" /organism="Helicobacter_pylori_2017_prodigal.orf.fsa"
MENSTLYIVIAGLWLAVGFGIFLKKLDMPVIIGYICTGTVLAAFFKINDFNLLSDIGEFG
IVFLMFMIGIEFNFDKLKSIKQEVLVFGLLQVVLCALIAFLLGYFVLGLSPIFSLVLGMG
LSLSSTAIVLKFFEDSKQLSTPMGKSAVGILIFQDIAAIPMLLILTILGSKDSHVNLLIL
KTLISAGIILVLLLLPGKKGANLILEQAKDTRLPEIFIGTILVIVCSAAGLSHFFGFSMS
LGAFIVGMAISKSRYKINVQEEFAQLKNLFLALFFITIGMQINVSFFMEKFFVVIFLLIL
VMSFKTFIIYALLCFFRDAKTAIKTALSLAQIGEFSFVIFLNSGSHQLFNLQEKKGILGF
LHQKNILNIAQNDIHQLLILMVVFSMLATPFILKYLESIAQFILHQKSQENEPAKK
> /gene_family="1480" /family_size="39" /organism="Helicobacter_pylori_2017_prodigal.orf.fsa"
MGHVVLSTPIVTMFVVYSLLMLYIGFYFYKQNETTEDYFLGDRSMGPVISALSAGASDMS
GWLLMGLPGALYVGGLINSHIAIGLSLGALINWVFVAKRLRVYTSVIANSITISDYFETR
FSDDKHILRLISAFVILIFFIFYISSGLVSGAKLFEATFGIQYSYALSIGTLIIVSYTFL
GGYKAVCWTDLIQGLLMMSALIVVPIVMIIHLGGIGEGIKIIREIKPENLSFLQGSSVVA
IISSLAWGLGYFGQPHILVRFMSIRSIKDVPKATIIGISWMVISLIGACVMGLLGVAYAH
KFDLSLEDPEKIFIVMSQLLFNPWITGILLSAILAAVMSTASSQLLVSSSTIAEDFYATI
FNKNAPQKLVMVISRLSVLGVACIAFFISTDKNASILSIVSYAWAGFGASFGSVILFSLF
WSRMTRIGAIAGMLSGASTVILYDKFGKSFLDIYEIVPGFIVASIAIVAFSLFSSVRAGT
KEAFETMLKEIESLRR
> /gene_family="714" /family_size="78" /organism="Helicobacter_pylori_2017_prodigal.orf.fsa"
MGKFSKLGFILATLGSSIGLGHIWRFPYMVGHNGGSAFVLLYLALTLSLGIAMLLVEMLI
GNLGKKDVVSNYQILDPKRKKYYPFTSFFILGGPLILSFYAVVLGWVLYYLFVVTFDLPK
DLEQAKMQFSMLQNGSLIWPVIGFSACLLPTIWFVSRGIEEGIEKLNVVLMPLLFVIFIG
LLIYAMTLESMPKALRFLFNFEIQKIDFKVVMDALGQMFFSLSLGVGTIITYSAFTPKKE
NLLKSSLFIVLPGILISLIAGVMIFTFVFEYHADVSQGPGLVFISLPLTFAKMGISGQIV
SLFFFIALVFAGITSTVSLIEPLALYLINRFNFSRTQASLWIGIVVYVLGVLVILSMNER
YAKFLSFAHKSVFGWLDFITSSFLMPLGGLFSVLFVGWVLNKKRSFLATKHFFNINAFKA
WHFSVRFIAPVVILAIFILQFK
> /gene_family="1238" /family_size="39" /organism="Helicobacter_pylori_2017_prodigal.orf.fsa"
MIEKIIDLSVKNKLLTTLITLLIFLASLWAIKSVRLDALPDLSPAQVVVQITYPNQSPKI
VQEQVTYPLVSTFMSIANIDTVRGISSYESGLIYIIFKDGVNLYWARDRVLEQLNRVNNL
PKDAKVEIGSDSTSIGWAYQYALSSDSKNLSDLKVLQDFYYRYALLGVDGVSEVASVGGF
VKDYEVTLQNDSLIRYNLSLEQVANAIKNSNNDTGGGVILENGFEKIIRSHGYIQSLKDL
EEIVIKKEGAIPLKIKDIASVRLVPKPRRGAANLNGDKEVVGGIVMVRYHADTYKVLKAI
KEKIATLQASNPDVKITSVYDRSELIEKGINNLIHTLIEESVIVLIIIAIFLLHFRSALV
VIITLPLSVCISFLLMRYFNIEASIMSLGGIAIAIGAMVDAAIVMVENAHKHLQRIDTKD
EIQRVNAIMQGVKHVGGAIFFALMIIVVSFLPIFVLTGQEEKLFAPLAYTKTFAMLVGAL
LSITIVPVLMVWLIKGRILEESKNPINAFFMKIYGVSLKVVLKFRYAFLIASVVGLGGLV
VAYKKLNWEFIPQINEGVIMYMPVTINGVGIDTALEYLKKSNSAIKQLDFVKQVFGKVGR
ANTSTDAAGLGMIETYIELKPQNEWKEKLSYKEVRDKLEKTLQLKGLTNSWTYPIRGRTD
MLLTGIRTPLGIKLYGNDTDKLQELAILMEQQLKTLKESLSVFAERSNNGYYITLDLNDE
NLARYGINKNAVLDAIKFALGGATLTTMIKGVESYPISLRLEDTDRDTIEKLKNLYIKTA
YNYMPLRELAHVYYDNSPAVLKSEKGLNVNFIYIVPQNGISSDTYRQLAQKALEKIQLPS
GYYYEFSGESQYLEEAFKTLQYIVPVSVFIIFILIVFALKNFTNSLLCFFTLPFAFLGGL
IFMNLMGFNMSVAALVGFLALLGVASETAIVMIIYLEDAFQKFIKTPLKERTTAALKEAI
MHGAVLRVRPKLMTFFSILASLIPIMYSHGTGSEIMKSIAAPMLGGMISSVVLTLFIIPT
AYFVIKNARIRKHEC
> /gene_family="230" /family_size="39" /organism="Helicobacter_pylori_2017_prodigal.orf.fsa"
MGFLKGKKGLIVGVANNKSIAYGIAQSCFNQGATLAFTYLNESLEKRVRPIAQELNSPYV
YELDVSKEEHFKSLYNNIKKDLGSLDFIVHSVAFAPKEALEGSLLETSKSAFNTAMEISV
YSLIELTNTLKPLLNNGASVLTLSYLGSTKYMAHYNVMGLAKAALESAVRYLAVDLGRHH
IRVNALSAGPIRTLASSGIADFRMILKWNEINAPLRKNVSLEEVGNAGMYLLSSLSNGVS
GEVHFVDAGYHVMGMGAVEEKDNKATLLWDLQNNKGY
> /gene_family="940" /family_size="39" /organism="Helicobacter_pylori_2017_prodigal.orf.fsa"
MIKSWTKKWVLILFLMASCFGHLVATTGEKYFKMANQALKRGDYHRAVAFYKRSCNLRMG
VGCTSLGSMYEYGDGVDQNISKAVFYYRRGCNLRNHLACASLGSMYEDGDGVQKDLPKAI
YYYRRGCHLKGGVSCGSLGFMYFNGVGVKQNYAKALSLSKYACSLNYGISCNFVGYMYRS
AKGVEQDLKKAFANFKRGCHLKDGASCVSLGYLYEAGMNVKQNQEQAMSLYKKGCSLKEG
SGCHNVAVMYYTGKGAPKDLEKATSYYKKGCALGFSGSCKVLEVIGKESDNLQDDAQNDT
QDSVQ
> /gene_family="792" /family_size="39" /organism="Helicobacter_pylori_2017_prodigal.orf.fsa"
MNIKILKILVGGLLFWGLNAHLWGKQDNSFLGIGERAYKSGNYSKAASYFKKACNDNVSE
GCTQLGIIYENGQGTRIDYKKALEYYKTACQADDREGCFGLGGLYDEGLGTAQNYQEAID
AYAKACVLKHPESCYNLGIIYDRKIKGNAAQAVTYYQKSCNFDMAKGCYVLGTAYEKGFL
EVKQSNHKAVIYYLKACRLNEGQACRTLGSLFENGDAGLDEDFEVAFDYLQKACALNNSG
GCASLGSMYMLGRYVKKDPQKAFNYFKQACDMGSAVSCSRMGFMYSQGDTVPKDLRKALD
NYERGCNMGDEVGCFALAGMYYNMKDKENAIMIYDKGCKLGMKQACENLTKLRGY
> /gene_family="747" /family_size="39" /organism="Helicobacter_pylori_2017_prodigal.orf.fsa"
MSKSLYQTLNVSENASQDEIKKSYRRLARQYHPDLNKTKEAEEKFKEINAAYEILSDEEK
RRQYDQFGDNMFGGQNFSDFARSRSASEDLDDILSSIFGKGGFSQRFSQNSQGFSGFNFS
NFAPENLDITATLNVSVLDTLLGNKKQVSVNNETFSLKIPIGVEEGEKIRVRNKGKTGRT
GRGDLLLQIHIEEDEMYRREKDDIIQIFDLPLKTALFGGKIEIATWHKTLTLTIPPNTKA
MQKFRIKDKGIKNRKTSHVGDLYLQARLILPKTETLSNELKALLEKEL
> /gene_family="30" /family_size="39" /organism="Helicobacter_pylori_2017_prodigal.orf.fsa"
MAIKTYKPYTPSRRFMSVLDSKDITAKSSVKGLLTKLKATAGRNNNGRITSRHKERGAKK
LYRIIDFKRNKYNIEGKVAAIEYDPYRNARIALVVYPDGDKRYILQPSGLKVGDSVIAAE
GGLDIKVGFAMKLKNIPIGTVVHNIEMHPGAGGQLARSAGMSAQIMGRENKYTILRMPSS
EMRYILSECMASVGVVGNEDFINVSIGKAGRNRHRGIRPQTRGSAMNPVDHPHGGGEGKT
GTSGHPVSPWGTPAKGYKTRKKKASDKLIISRKKHK
> /gene_family="1043" /family_size="39" /organism="Helicobacter_pylori_2017_prodigal.orf.fsa"
MGNLTYYAYMYLILFVCLLPVLLVGLVWRLTRPPLKQNIPNKSLSLENLNEQIKNLQNVP
ALEKLKNRFNERFKICPKDKETLWLETIQNLVASEFFELEDAINFGQELENANPNYRQKI
ANATGLALKNKKEKG
> /gene_family="128" /family_size="39" /organism="Helicobacter_pylori_2017_prodigal.orf.fsa"
MGSIGSMGKPIEGFLVAAIQFPVPIVNSRKDIDHNIESIIRTLHATKAGYPGVELIIFPE
YSTQGLNTAKWLSEEFLLDVPGKETELYAKACKEAKVYGVFSIMERNPDSNKNPYNTAII
IDPQGKIILKYRKLFPWNPIEPWYPGDLGMPVCEGPGGSKLAVCICHDGMIPELAREAAY
KGCNVYIRISGYSTQVNDQWILTNRSNAWHNLMYTVSVNLAGYDNVFYYFGEGQICNFDG
TTLVQGHRNPWEIVTGEIYPKMADNARLSWGLENNIYNLGHRGYVAKPGGEHDAGLTYIK
DLAAGKYKLPWEDHMKIKDGSIYGYPTTGGRFGK
> /gene_family="428" /family_size="46" /organism="Helicobacter_pylori_2017_prodigal.orf.fsa"
MHNACNCNSQRVPFKGFAIDSKDGKFHEWEHSRHAMGEYDVVIDTHFSGICHTDIHFAHS
DWLPGIYPMVPGHEIAGVVSAVGSKVTKFKVGDHAGVGCMVNSCGECHTCKHEHQEQWCE
NNKTIYTYSWEDSFHNNEPTYGGYSNNIVVSENFVISIPKEAPLDKAAPLLCAGITVYSP
LKFSKVTKGSKVGIAGFGGLGHMALKYAVAMGAQVSVFARNDKKKQMAQKLGATNFYTSV
GECKEKFDLIVSSIPTQYDLLAYTKLLKYGGEVAIVGIPPKDPQRNLDFGDLVLFSGNHK
VYGSWIGGVKETQEMMDFSVKHGIYPEIELVTGQEIDATWDKLLNGQGNFRYVIDMKKSM
ENFKK
> /gene_family="664" /family_size="46" /organism="Helicobacter_pylori_2017_prodigal.orf.fsa"
MISNIRIHPKTMFKNALNIQDFSFKSHTSTAIIGTNGAGKSTLINTILGIRSDYNFKAQN
NNIPYHDNVIPQRKQLGVVSNLFNYPPGLNANDLFKFYQFFHKNCTPNLFEKNLLNKTYE
HLSDGQKQRLKIDLALSHHPQLIIMDEPETSLEQNALIRLSNLISLRNTQQLTSIIATHD
PIVLDSCEWVLLLKNGNIAQYKPLNSILKSVAKTFNFKEKPTTKDLLALLKDI
> /gene_family="928" /family_size="39" /organism="Helicobacter_pylori_2017_prodigal.orf.fsa"
MRRSFLKTIGLGVIALSLGLLNPLSAASYPPIKNTKVGLALSSHPLATEIGQKVLEEGGN
AIDAAVAIGFALAVVHPAAGNIGGGGFAVIHLANGENVALDFREKAPLKATKNMFLDKQG
NVVPKLSEDGYLAAGVPGTVAGMEAMLKKYGTKKLSQLIDPAIKLAENGYAISQRQAETL
KEARERFLKYSSSKKYFFKKGHLDYQEGDLFVQKDLAKTLNQIKTLGAKGFYQGQVADLI
EKDMQKNGGIITKEDLASYNVKWRKPVIGSYRGYKIISMSPPSSGGTHLIQILNVMENAD
LSALGYGASKNIHIVAEAMRQAYADRSVYMGDADFVSVPVDKLINKAYAKKIFDAIQPDT
VTPSSQIKPGMGQLHEGSNTTHYSVADRWGNAVSVTYTINASYGSAASIDGAGFLLNNEM
DDFSIKPGNPNLYGLVGGDANAIEANKRPLSSMSPTIVLKNNKVFLVVGSPGGSRIITTV
LQVISNVIDYNMNISEAVSAPRFHMQWLPDELRIEKFGMPADVKDNLTKMGYQIVTKPVM
GDVNAIQVLPKTKGSVFYGSTDPRKEF
> /gene_family="1097" /family_size="39" /organism="Helicobacter_pylori_2017_prodigal.orf.fsa"
MKKLILAVFFTLTLSISAKEVKIVFLETSDIHGRLFSYDYAVGEQKPNNGLTRIATLIKK
QRAENKNVVLIDSGDLLQGNSTELFNNEPIHPLVRAENDLKFDIRVLGNHEFNFSKDFLE
KNIKGFNGNVVNANIIKIADNKPFVKPYIIKKIDGVRVAVVGFLVPHVPTWEASTPEHFA
GLKFLDAEEALKKTLNELKGKYDILIGAFHLGREDEKGGDGIPDLAKKFPQFDIIFAGHE
HAVYNTKVGKVHTIEPGAYGAYLAKGVVVFDTKTKKKTITTENLPTKDAPEDEELAKKYE
YVDKKSKEYANEVVGEVTKTFIDRPDFITGEEKITTMPTAALQETPVIELINKVQKYYAK
ADVSAAALFNFGANLKKGPFKRKDVAYIYKFSNTLIGVNITGENLLKYMEWSYKFYNQLQ
PGDLTISFNENVRGYNFDMFSGVKYQVDVTKPAGQRIINPTINGKPIDLKAVYKLAINNY
RFGTLSTTLKLVTDADRYYDSYDALQDNGQIRDLIIKYITEKKGAKVTPELEHNWEIINY
DFKNPLLERLAEKLKEGSIKIPTSKDGRTLNVKSIKESEVE
> /gene_family="88" /family_size="39" /organism="Helicobacter_pylori_2017_prodigal.orf.fsa"
MKAFLKILMVLIFMSVAHAKNPLTLSKEEEVLQHLQSFSAHFKQVLKNEKPLVYYGILKA
KAPNWALWVYEKPLKKEIYMNDKEVVVYEPNLFQATITPLKDKTDFFTILKRLKKQTDGS
FKTTINKTTYRLTFKDGKPFSLEFKDEMNNLVTITFSQAEINPKIPNEIFVFNPKDENID
IVHQ
> /gene_family="1595" /family_size="39" /organism="Helicobacter_pylori_2017_prodigal.orf.fsa"
MLKKIFYGFMVLVLIIIGLLAVLVAQVWVTTDKDIAKIKDYRPSVASQILDRKGRLIANI
YDKEFRFYARFEEIPPRFVESLLAVEDTLFFEHGGINLDAVMRAMIKNAKSGRYTEGGST
LTQQLVKNMVLTREKTLTRKLKEAIISIRIEKVLSKEEILERYLNQTFFGHGYYGVKTAS
LGYFKKPLDKLTLKEITMLVALPRAPSFYDPTKNLEFSLSRANDILRRLYSLGWISSNEL
KSALNEVPIVYNQTSTQNIAPYVVDEVLKQLDQLDGLKTQGYTIKLTIDLDYQRLALESL
RFGHQKILEKIAKEKPKTNASNDEDEDNLNASMIVTDTSTGKILALVGGIDYKKSAFNRA
TQAKRQFGSAIKPFVYQIAFDNGYSTTSKIPDTARNFENGNYSKNSVQNHAWHPSNYTRK
FLGLVTLQEALSHSLNLATINLSDQLGFEKIYQSLSDMGFKNLPKDLSIVLGSFAISPID
AAEKYSLFSNYGTMLKPMLIESITNQQNEVKTFTPIETKKITSKEQAFLTLSALMDAVEN
GTGSLARIKGLEIAGKTGTSNNNIDAWFIGFTPTLQSVIWFGRDDNTPIGKGATGGVVSA
PVYSYFMRNILAIEPSLKRKFDVPKGLRKEIVDKIPYYSTPNSITPTPKKTDDSEERLLF
> /gene_family="387" /family_size="39" /organism="Helicobacter_pylori_2017_prodigal.orf.fsa"
MNSVFIKGLSLSVLLLFGSFLKASENPNATLNPSKENVSIEEQKRFGGVLVFARGADGSS
MDPALVTDGESYVATGNIYDTLVQFKYGTTEVEPALATSWEISPDGLVYTFHLRKGVYFH
QTKYWNKKVEFSAKDVLFSFERQMDKAKRYYSPGAKSYKYWEGMGMSHIIKSIEALDDYT
IRFTLNGPEAPFLANLGMDFLSILSKDYADYLAQNNKKDELAKKPIGTGPFKFFLWNKDE
KIILVKNQDYWGPKAYLDKVVVRTIPNSSTRALALRTGEIMLMTGPNLNEVEQLEKLPNI
VVDRSPGLIANWLSLNTQKKYFNNPLVRLAINHAINVDDYIKVIYEGFAQKMVNPFPPTI
WGYNYNIKPYEYDLKKAKELLKQAGYPNGFKTTIFTTSTRNPKGAVFIQASLAKIGIDVK
IEVYEWGAYLKRTGLGEHEMAFAGWMADIADPDNFLYTLWSKQAASAIPTQNGSFYKSDA
FSDLLIKAKRVSDQKEREALYLKAQEIIHKDAPYVPLAYPYSVVPHLSKVKGYKTTGVSV
NRFFKVYLEK
