# Supplementary material for: Pan-Genome Analysis of Human Gastric Pathogen H. pylori: Comparative Genomics and Pathogenomics Approaches to Identify Regions Associated with Pathogenicity and Prediction of Potential Core Therapeutic Targets
Source: Biomed Res Int. 2015 Jan 29;2015:139580. doi: 10.1155/2015/139580 (PMC4325212; doi:10.1155/2015/139580)
Supplement: Supplementary file 1 — The supplementary data provides insight view to results originally extracted from different tools and databases. Because of availability of large dataset it was not possible to incorporate all of it the article. You can access the additional files having the composition of core genome families of all 1193 genomes (Additional file 1). Additional file 2 contains BLAST data extracted from DEG, number of homologs along with their AC number against all query proteins. Additional file 3 contains BLAST result of gene families against Human genome to find non-human homologs. Protein sequence of all gene families has been provided in Additional file 4. Additional file 5 gives a comprehensive view of all predicted epitopes along with their location and their predictions as antigenic or not. [file 139580.f1.zip › supplementary material/Additional file 5.xlsx]

## Sheet: Sheet1
gene_family="1495"					gene_family="1623"					gene_family="1487"					gene_family="1447"					gene_family="821"					gene_family="222"					gene_family="197"				gene_family="577"				gene_family="1486"					gene_family="948"						gene_family="1439"
Position	Epitope	Score			Position	Epitope	Score			Position	Epitope	Score			Position	Epitope	Score			Position	Epitope	Score			Position	Epitope	Score			Position	Epitope	Score		Position	Epitope	Score		Position	Epitope	Score			Position	Epitope	Score		> /gene_family="1028"		Position
612	RFPNHKLMNTGGGIEEERRL	0.999			223	KNAPKTALKMQNNQQIEVLV	0.998	0.5790 ( Probable ANTIGEN		119	DGADKIKVTIPGSNKEYSAT	0.994	0.6042 ( Probable ANTIGEN ).		102	ASAIKKDENITANNTKKERV	0.996	1.1013 ( Probable ANTIGEN )		27	LRNKTPKKNYQEAHEKLYRS	0.943	0.6847 ( Probable ANTIGEN		201	EVFNNVEAIKISNGEKLEHK	0.809	0.6994 ( Probable ANTIGEN ).		75	IDKDNPRTKNRPSVDGRISV	0.838		184	YIAYDTQNIVKGMYDSPIDA	0.757		40	TKQETTNNHTTISPNAPNAQ	0.999	1.1006 ( Probable ANTIGEN		87	AKFIGPGTGYMVFWMYWLGW	0.99	0.7112 ( Probable ANTIGEN )	NO EPItope		397
431	IQPNQEAKIYTKKKEITSMG	0.995			430	FDKTGTLTNGKPVVKSVHSN	0.992	0.6283 ( Probable ANTIGEN		425	GFRQGNIITKIEEIEVKSVA	0.991	0.4580 ( Probable ANTIGEN		20	NALKTGIKETYLKEYKDLKL	0.892	0.6716 ( Probable ANTIGEN ).		48	INRQKLTRKKSGWYFLGGVG	0.94																386	APKMKELQEKYKGEPQKLQA	0.991	0.8468 ( Probable ANTIGEN )		1	MEHQNTTQKQGELKRDMKMR	0.966	1.5091 ( Probable ANTIGEN ).			340
123	NATDEDKKPYTSQHLYALYS	0.963			603	AKPQDKLNKIKELKEKGRIV	0.974			370	NKKETISAQNGVQGQLNGLQ	0.991	1.0343 ( Probable ANTIGEN							140	MEFPLGSYKHYLGAFGGARG	0.763																153	KAFNTPYSASKTTLGPNEQL	0.985			32	GTGLFVGTGGNIASAGPLGT	0.96
649	KNELRENAKPKEHKPSVFLY	0.962			260	AVDGEIIEGEGELDESMLSG	0.956	0.9125 ( Probable ANTIGEN )		404	SDDVQGVLVSQVNENSPAEQ	0.934	0.5238 ( Probable ANTIGEN																									407	MMQLYKKHGANPLGGCLPLI	0.976	0.4148 ( Probable ANTIGEN )		413	YKAPFLPFLQLIGITGCIIG	0.812	0.5355 ( Probable ANTIGEN )
91	RYLKEHYPNLSLKQPKELRK	0.893			285	YKKVGDKVFSGTLNSNTSFL	0.934	0.4185 ( Probable ANTIGEN		60	TEKKIKNNFIGGGVFNDPFF	0.903	0.4488 ( Probable ANTIGEN																									472	ASMYWHQSVTPNTMTDPMQA	0.954			188	SSIFDNFHFGDKGFFPNGSE	0.753
569	RFLNGTLIGSSEATQGEGVN	0.891			4	SFYIEGMTCTACSSGIERSL	0.89	1.1438 ( Probable ANTIGEN		293	NKEGAVVISVEKDSPAKKAG	0.882	0.6466 ( Probable ANTIGEN																									93	QVYLKDKKYLTPKEKGFLEH	0.903			117	IGMLMQRWFVNIPIHYWVIS	0.741	1.3138 ( Probable ANTIGEN )
528	KERSKNKDGSYNEFKKLQAQ	0.881	0.9336 Probable ANTIGEN		57	KLIEKLGYSPKKTLAEEKKE	0.854			19	NIQIQNMPKVKERISVPSKE	0.88																										302	ANLHGYIGPKDYRSLKAISP	0.822	0.6298 ( Probable ANTIGEN
150	QEDFSAWLSSKNPEHAPYAA	0.829			306	KATQDNKNSTLSQIIEMIHN	0.811			81	QFFGDLGGMIPKERMERALG	0.868																										234	ENNDKKIEKIEDKDAKEIKR	0.77	1.2363 ( Probable ANTIGEN ).
460	NSSRFNSVIDKAFHSHPVLM	0.792	0.4867 ( Probable ANTIGEN )							262	VTQLIKTGKIERGYLGVGLQ	0.867
294	RIYPKNLEVVKSGKFNKPTL	0.786								204	NSYENFIQTDASINPGNSGG	0.859	0.7335 ( Probable ANTIGEN
497	LYTKAPTHSPSALIKHILES	0.752								233	VGINTAIISKTGGNHGIGFA	0.762	1.0569 ( Probable ANTIGEN
										175	VFAIGNPFGVGESVTQGIVS	0.757	0.6371 ( Probable ANTIGEN )
[truncated: 67 more columns]
